# Supplementary material for: Chlorine, an atom economical auxiliary for asymmetric aldol reactions
Source: Royal Society of Chemistry journal article supplement (doi:10.1039/c3ob27462d), 2013-01-01
Supplement: c3ob27462d.pdf [file c3ob27462d.pdf]

# Chlorine, an atom economical auxiliary for asymmetric aldol reactions

Shira D. Halperin and Robert Britton\*

*Department of Chemistry, Simon Fraser University  
Burnaby, British Columbia, Canada*

## Supporting Information

### Table of Contents

|                                                                                |      |
|--------------------------------------------------------------------------------|------|
| General Experimental Details .....                                             | S-3  |
| General Procedure A: dechlorination of $\beta$ -ketoaldehydes .....            | S-4  |
| General Procedure B: addition of acetonitrile to $\alpha$ -chloroaldehyde..... | S-4  |
| Preparation of compound <b>24</b> .....                                        | S-5  |
| Preparation of compound <b>27</b> .....                                        | S-5  |
| Preparation of compound <b>26</b> .....                                        | S-6  |
| Preparation of compound <b>25</b> .....                                        | S-7  |
| Preparation of compound <b>28</b> .....                                        | S-8  |
| Preparation of compound <b>29</b> .....                                        | S-9  |
| Preparation of compound <b>32</b> .....                                        | S-10 |
| Preparation of compound <b>14</b> .....                                        | S-11 |
| Preparation of compound <b>19</b> .....                                        | S-11 |
| Preparation of compound <b>11</b> .....                                        | S-11 |
| Preparation of compound <b>16</b> .....                                        | S-12 |
| Preparation of compound <b>12</b> .....                                        | S-13 |
| Preparation of compound <b>17</b> .....                                        | S-14 |
| Preparation of compound <b>13</b> .....                                        | S-14 |
| Preparation of compound <b>18</b> .....                                        | S-15 |
| Preparation of compound <b>34</b> .....                                        | S-16 |
| Preparation of compound <b>36</b> .....                                        | S-17 |
| Preparation of compound <b>38</b> .....                                        | S-18 |
| Preparation of compound <b>41</b> .....                                        | S-19 |
| Preparation of compound <b>39</b> .....                                        | S-19 |
| Preparation of compound <b>40</b> .....                                        | S-20 |
| $^1\text{H}$ NMR and $^{13}\text{C}$ NMR spectra for compound <b>24</b> .....  | S-22 |
| $^1\text{H}$ NMR and $^{13}\text{C}$ NMR spectra for compound <b>27</b> .....  | S-23 |
| $^1\text{H}$ NMR and $^{13}\text{C}$ NMR spectra for compound <b>26</b> .....  | S-24 |
| $^1\text{H}$ NMR and $^{13}\text{C}$ NMR spectra for compound <b>25</b> .....  | S-25 |
| $^1\text{H}$ NMR and $^{13}\text{C}$ NMR spectra for compound <b>28</b> .....  | S-26 |
| $^1\text{H}$ NMR and $^{13}\text{C}$ NMR spectra for compound <b>29</b> .....  | S-27 |
| $^1\text{H}$ NMR and $^{13}\text{C}$ NMR spectra for compound <b>32</b> .....  | S-28 |

|                                                                                 |      |
|---------------------------------------------------------------------------------|------|
| <sup>1</sup> H NMR and <sup>13</sup> C NMR spectra for compound <b>43</b> ..... | S-29 |
| <sup>1</sup> H NMR and <sup>13</sup> C NMR spectra for compound <b>16</b> ..... | S-30 |
| <sup>1</sup> H NMR and <sup>13</sup> C NMR spectra for compound <b>12</b> ..... | S-31 |
| <sup>1</sup> H NMR and <sup>13</sup> C NMR spectra for compound <b>17</b> ..... | S-32 |
| <sup>1</sup> H NMR and <sup>13</sup> C NMR spectra for compound <b>13</b> ..... | S-33 |
| <sup>1</sup> H NMR and <sup>13</sup> C NMR spectra for compound <b>18</b> ..... | S-34 |
| <sup>1</sup> H NMR and <sup>13</sup> C NMR spectra for compound <b>14</b> ..... | S-35 |
| <sup>1</sup> H NMR and <sup>13</sup> C NMR spectra for compound <b>19</b> ..... | S-36 |
| <sup>1</sup> H NMR and <sup>13</sup> C NMR spectra for compound <b>36</b> ..... | S-37 |
| <sup>1</sup> H NMR and <sup>13</sup> C NMR spectra for compound <b>41</b> ..... | S-38 |
| <sup>1</sup> H NMR and <sup>13</sup> C NMR spectra for compound <b>38</b> ..... | S-39 |
| <sup>1</sup> H NMR and <sup>13</sup> C NMR spectra for compound <b>39</b> ..... | S-40 |
| <sup>1</sup> H NMR and <sup>13</sup> C NMR spectra for compound <b>40</b> ..... | S-41 |
|                                                                                 |      |
| Chiral HPLC chromatogram for compound <b>27</b> .....                           | S-42 |
| Chiral HPLC chromatogram for compound <b>26</b> .....                           | S-43 |
| Chiral HPLC chromatogram for compound <b>25</b> .....                           | S-44 |
| Chiral HPLC chromatogram for compound <b>24</b> .....                           | S-45 |
| Chiral HPLC chromatogram for compound <b>28</b> .....                           | S-46 |
| Chiral GC chromatogram for compound <b>29</b> .....                             | S-47 |
| Chiral HPLC chromatogram for dihydroyashabushiketol <b>32</b> .....             | S-48 |
| Chiral HPLC chromatogram for solistatin <b>40</b> .....                         | S-49 |

## General Experimental Details

All reactions were performed under an atmosphere of dry nitrogen using oven dried glassware unless otherwise specified. THF was freshly distilled from sodium/benzophenone and CH<sub>2</sub>Cl<sub>2</sub> was distilled from CaH<sub>2</sub> prior to use. Commercial anhydrous EtOH (reagent grade) was used without further purification. Cold temperatures were maintained by use of the following reaction baths: 0 °C, ice-water; -78 °C, acetone-dry ice; temperatures between -78 °C and -0 °C required for longer reaction times were maintained with a Polyscience VLT-60A immersion chiller.

Flash chromatography was carried out with 230-400 mesh silica gel (E. Merck, Silica Gel 60) following the technique described by Still.<sup>1</sup> Concentration and removal of trace solvents was carried out with a Buchi rotary evaporator using acetone-dry-ice condenser and a Welch vacuum pump.

Gas chromatography (GC) analysis was performed on an Agilent 6890 gas chromatograph, equipped with a flame ionization detector and a custom-made chiral GC column coated with a 1:1 mixture of heptakis-(2,6-di-O-methyl-3-O-pentyl)-beta-cyclodextrin and OV-1701.<sup>2</sup> High performance liquid chromatography (HPLC) analysis was performed on an Agilent 1100 HPLC, equipped with a variable wavelength UV-Vis detector and Chiralcel OD-H chiral column (0.46 cm x 25 cm).

NMR spectra were recorded using deuteriochloroform (CDCl<sub>3</sub>) as the solvent unless otherwise indicated. Signal positions ( $\delta$ ) are given in parts per million from tetramethylsilane ( $\delta$  0) and were measured relative to the signal of the solvent (CDCl<sub>3</sub>:  $\delta$  7.26, <sup>1</sup>H NMR;  $\delta$  77.0, <sup>13</sup>C NMR) Coupling constants (*J* values) are given in Hertz (Hz) and are reported to the nearest 0.1 Hz. <sup>1</sup>H NMR spectral data are tabulated in the order: multiplicity (s, singlet; d, doublet; t, triplet; m, multiplet), coupling constants, number of protons. Proton nuclear magnetic resonance (<sup>1</sup>H NMR) spectra were recorded on a Bruker Avance 600 equipped with a QNP or TCI cryoprobe (600 MHz), Varian Inova 500 (500 MHz), or Bruker 400 (400 MHz). Carbon nuclear magnetic resonance (<sup>13</sup>C NMR) spectra were recorded on a Bruker Avance 600 equipped with a QNP or TCI cryoprobe (150 MHz), Varian Inova 500 (125 MHz), or Bruker 400 (100 MHz). Assignments of <sup>1</sup>H and <sup>13</sup>C NMR spectra are based on analysis of <sup>1</sup>H-<sup>1</sup>H COSY, HMBC, HMQC and nOe spectra.

Infrared (IR) spectra were recorded on a MB-series Bomem/Hartman & Braun Fourier transform spectrophotometer with internal calibration as films between sodium chloride plates. Only selected, characteristic absorption data are provided for each compound. High resolution mass spectra (HRMS-ESI) were recorded on a Bruker micrOTOF II mass spectrometer. Optical rotation was measured on a Perkin Elmer Polarimeter 341 at 589nm.

---

1. Still, W. C.; Kahn, M.; Mitra, A. *J. Org. Chem.* **1978**, *43*, 2923.

2. Koenig, W.A.; Gehrke, B.; Icheln, D.; Evers, P.; Donnecke, J.; Wang, W. *J. High Resol. Chromatography* **1992**, *15*, 367.

The  $\beta$ -ketochlorohydrins **10**, **12**, **22** were all prepared according to previously described procedures without complication.<sup>3</sup>

**General Procedure A:** *dechlorination of  $\beta$ -ketochlorohydrins*

To a 0.1 M solution of  $\beta$ -ketochlorohydrin in toluene was added tris(trimethylsilyl)silane (5 equiv) and the resultant solution was sparged with N<sub>2</sub> for 20 minutes. A catalytic amount (1-2 mg) of AIBN was then added, and the reaction vessel was sealed and heated to 110 °C in an oil bath and maintained at this temperature for 18 hours. The reaction mixture was then cooled to room temperature and concentrated. Purification of the crude product was accomplished by flash chromatography as noted.

**General Procedure B:** *addition of acetonitrile to  $\alpha$ -chloroaldehydes*

To a cold (-78 °C), stirred 0.2 M solution of diisopropylamine (1.1 equiv) in THF was added *n*-BuLi (1.1 equiv, 2.5 M in hexanes). This mixture was allowed to warm to 0 °C and was stirred at this temperature for 20 minutes prior to cooling to -78 °C, at which temperature a solution of acetonitrile (1.0 equiv) in THF (1 ml) was added. After an additional 30 minutes of stirring at -78 °C, a solution of the  $\alpha$ -chloroaldehyde (1.3 equiv) in THF was slowly added to the reaction mixture. After a further 20 minutes stirring at -78 °C, the reaction mixture was treated with saturated aqueous NH<sub>4</sub>Cl, diluted with EtOAc, the phases were separated, and the aqueous phase was washed with EtOAc (3 x 30 ml). The combined organic phases were washed with brine, dried (MgSO<sub>4</sub>), and concentrated to provide a crude oil. Purification of the crude product was carried out by flash chromatography as noted.

---

3. (a) Draper, J.; Britton, R. *Org. Lett.* **2010**, *12*, 4034. (b) Halperin, S. D.; Kang, B.; Britton, R. *Synthesis*, **2011**, 1946.

### (*R*)-5-hydroxyhexadecan-7-one (**24**)

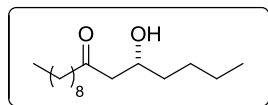

Prepared following General Procedure A. The crude product was purified by flash chromatography (hexanes-EtOAc 9:1) to afford (*R*)-5-hydroxyhexadecan-7-one (**20**) (21 mg, 92%) as a white solid.

mp 41-44 °C

IR (neat): 3333, 2955, 2918, 2849, 1703, 1466, 1118, 720 cm<sup>-1</sup>

<sup>1</sup>H NMR (400 MHz, CDCl<sub>3</sub>) δ: 4.03 (m, 1H), 3.04 (d, *J* = 3.5 Hz, 1H), 2.60 (dd, *J* = 2.8, 17.5 Hz, 1H), 2.49 (dd, *J* = 9.2, 17.5 Hz, 1H), 2.42 (t, *J* = 7.5 Hz, 2H), 1.61-1.20 (m, 20H), 0.93-0.84 (m, 6H).

<sup>13</sup>C NMR (100 MHz, CDCl<sub>3</sub>) δ: 212.7, 67.7, 48.9, 43.7, 36.1, 31.9, 29.40, 29.38, 29.3, 29.2, 27.6, 23.6, 22.7, 22.6, 14.1, 14.0.

HRMS: *m/z* calc for C<sub>16</sub>H<sub>32</sub>O<sub>2</sub>: 257.2481 (M+H); Found: 257.2477 (M+H).

[α]<sub>D</sub><sup>20</sup> = + 29.1° (c 0.28, CHCl<sub>3</sub>)

Determination of enantiomeric excess for 5-hydroxyhexadecan-7-one (**24**).

Samples of both 'racemic'<sup>4,5</sup> and optically enriched 5-hydroxyhexadecan-7-one (**24**) were converted into the corresponding benzoyl esters (5 equiv. benzoyl chloride, 10 equiv. pyridine, CH<sub>2</sub>Cl<sub>2</sub>, 14 h, room temperature). The corresponding enantiomeric benzoyl esters of 5-hydroxyhexadecan-7-one (**24**) were separable by chiral HPLC using a DAICEL-CHIRALCEL-OD column. Eluent = hexanes: IPA 95:5, detection at 230 nm, flow rate = 1.2 mL/min. The retention time of the (+)-enantiomer is 5.18 min; the retention time of the (-)-enantiomer is 4.14 min (see chromatograms below).

---

4. 'Racemic' β-hydroxyketones were prepared in an identical manner to the optically enriched β-hydroxyketones except that the α-chloroaldehyde starting materials were prepared using proline catalysis. As reported by Jørgensen,<sup>5</sup> α-chloroaldehydes prepared in this way have an enantiomeric excess less 25% (enantiomeric ratio approximately 60:40). As a result, the chromatograms of 'racemic' β-hydroxyketones do not show an equal proportion of enantiomers and instead range from 0 to 25% enantiomeric excess.

5. Halland, N.; Braunton, A.; Bachmann, S.; Marigo, M.; Jørgensen, K. A. *J. Am. Chem. Soc.*, **2004**, *126*, 4790.

### (*R*)-3-hydroxy-1-phenyltetradecan-5-one (**27**)

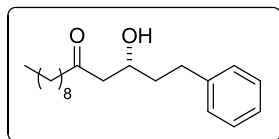

Prepared following General Procedure A. The crude product was purified by flash chromatography (hexanes-EtOAc 9:1) to afford (*R*)-3-hydroxy-1-phenyltetradecan-5-one (**27**) (18 mg, 85%) as a white solid.

mp 35-38 °C

IR (neat): 3372, 3273, 3027, 2953, 2917, 2850, 1704, 14468, 1453, 1110, 697 cm<sup>-1</sup>

<sup>1</sup>H NMR (400 MHz, CDCl<sub>3</sub>) δ: 7.31-7.28 (m, 2H), 7.22-7.17 (m, 3H), 4.05 (m, 1H), 3.17 (d, *J* = 3.2 Hz, 1H), 2.82 (ddd, *J* = 5.4, 9.8, 14.2 Hz, 1H), 2.69 (ddd, *J* = 6.9, 9.8, 14.2 Hz, 1H), 2.60 (dd, *J* = 3.0, 17.7 Hz, 1H), 2.52 (dd, *J* = 8.9, 17.7 Hz, 1H), 2.40 (t, *J* = 7.5 Hz, 2H), 1.82 (m, 1H), 1.68 (m, 1H), 1.61-1.50 (m, 2H), 1.35-1.20 (m, 12H), 0.88 (t, *J* = 7.0 Hz, 3H).

<sup>13</sup>C NMR (100 MHz, CDCl<sub>3</sub>) δ: 212.6, 141.9, 128.47, 128.41, 125.9, 66.9, 48.9, 43.7, 38.0, 31.9, 31.8, 29.4, 29.3, 29.2, 29.1, 23.6, 22.7, 14.1.

HRMS: *m/z* calcd for C<sub>20</sub>H<sub>32</sub>O<sub>2</sub>: 305.2475 (M+H); Found: 305.2476 (M+H).

[α]<sub>D</sub><sup>20</sup> = + 26.6° (c 0.15, CHCl<sub>3</sub>)

Determination of enantiomeric excess for (*R*)-3-hydroxy-1-phenyltetradecan-5-one (**27**).

Samples of both 'racemic'<sup>4,5</sup> and optically enriched (*R*)-3-hydroxy-1-phenyltetradecan-5-one (**27**) were analyzed by chiral HPLC using a DAICEL-CHIRALCEL-OD column. Eluent = hexanes:IPA 20:1; detection at 205 nm; flow rate = 1.2 mL/min. The retention time of the (+)-enantiomer is 12.13 min; the retention time of the (-)-enantiomer is 7.83 min. (see chromatograms below).

### (*R*)-1-(*tert*-butyldimethylsilyloxy)-6-hydroxy-8-phenyloctan-4-one (**26**)

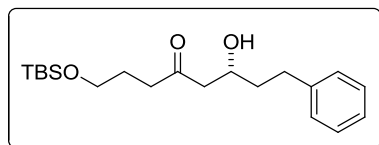

Prepared following General Procedure A. The crude product was purified by flash chromatography (hexanes-EtOAc 10:1) to afford (*R*)-1-(*tert*-butyldimethylsilyloxy)-6-hydroxy-8-phenyloctan-4-one (**26**) (12 mg, 86%) as a

colourless oil.

IR (neat): 3453, 3026, 3027, 2953, 2928, 2857, 1708, 1496, 1256, 1100, 1032, 836, 699 cm<sup>-1</sup>

$^1\text{H}$  NMR (400 MHz,  $\text{CDCl}_3$ )  $\delta$ : 7.32-7.28 (m, 2H), 7.23-7.17 (m, 3H), 4.06 (m, 1H), 3.62 (t,  $J = 6.1$  Hz, 2H), 3.19 (s, 1H), 2.83 (m, 1H), 2.69 (m, 1H), 2.63 (dd,  $J = 2.7, 17.6$  Hz, 1H), 2.55 (dd,  $J = 9.1, 17.6$  Hz, 1H), 2.51 (t,  $J = 7.4$  Hz, 2H), 1.88-1.76 (m, 3H), 1.69 (m, 1H), 0.89 (s, 9H), 0.04 (s, 6H).

$^{13}\text{C}$  NMR (100 MHz,  $\text{CDCl}_3$ )  $\delta$ : 212.2, 141.9, 128.5, 128.4, 125.9, 66.9, 62.0, 49.1, 40.0, 38.1, 31.8, 26.6, 25.9, 25.9, 18.3, -5.4.

HRMS:  $m/z$  calcd for  $\text{C}_{20}\text{H}_{34}\text{O}_3\text{Si}$ : 351.2311 (M+H); Found: 351.2357 (M+H)

$[\alpha]_D^{20} = + 26.2^\circ$  (c 0.11,  $\text{CHCl}_3$ )

Determination of enantiomeric excess for (*R*)-1-(*tert*-butyldimethylsilyloxy)-6-hydroxy-8-phenyloctan-4-one (**26**).

Samples of both 'racemic'<sup>4,5</sup> and optically enriched (*R*)-1-(*tert*-butyldimethylsilyloxy)-6-hydroxy-8-phenyloctan-4-one (**26**) were analyzed by chiral HPLC using a DAICEL-CHIRALCEL-OD column. Eluent = hexanes:IPA 95:5; detection at 205 nm; flow rate = 1.2 mL/min. The retention time of the (+)-enantiomer is 18.06 min; the retention time of the (-)-enantiomer is 10.22 min (see chromatograms below).

### (*R*)-5-hydroxy-1-phenylnonan-3-one (**25**)

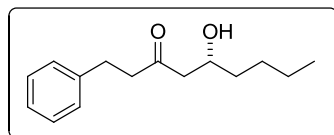

Prepared following General Procedure A. The crude product was purified by flash chromatography hexanes-EtOAc 9:1) to afford (*R*)-5-hydroxy-1-phenylnonan-3-one (**25**) (16 mg, 92%) as a white solid.

mp 161-165 °C

IR (neat): 3454, 2955, 2928, 2857, 1711, 1604, 1454, 1260, 1032, 841  $\text{cm}^{-1}$

$^1\text{H}$  NMR (400 MHz,  $\text{CDCl}_3$ )  $\delta$ : 7.32-7.25 (m, 2H), 7.23-7.15 (m, 3H), 4.02 (m, 1H), 2.95-2.88 (m, 3H), 2.79-2.73 (m, 2H), 2.57 (dd,  $J = 3.0, 17.5$  Hz, 1H), 2.49 (dd,  $J = 8.9, 17.5$  Hz, 1H), 1.43-1.23 (m, 7H), 0.89 (t,  $J = 7.2$  Hz, 3H).

$^{13}\text{C}$  NMR (100 MHz,  $\text{CDCl}_3$ )  $\delta$ : 211.2, 140.7, 128.5, 128.3, 126.2, 67.6, 49.3, 45.1, 36.1, 29.5, 27.6, 22.6, 14.0.

HRMS:  $m/z$  calcd for  $\text{C}_{15}\text{H}_{23}\text{O}_2$ : 235.1693 (M+H); Found: 235.1693 (M+H)

$[\alpha]_D^{20} = + 41.2^\circ$  (c 0.27,  $\text{CHCl}_3$ )

Determination of enantiomeric excess for (*R*)-5-hydroxy-1-phenylnonan-3-one (**25**).

Samples of both 'racemic'<sup>4,5</sup> and optically enriched (*R*)-5-hydroxy-1-phenylnonan-3-one (**25**) were analyzed by chiral HPLC using a DAICEL-CHIRALCEL-OD column. Eluent = hexanes:IPA 20:1; detection at 210 nm; flow rate = 1.2 mL/min. The retention time of the (+)-enantiomer is 12.25 min; the retention time of the (-)-enantiomer is 8.10 min. (see chromatograms below).

### (*R*)-5-hydroxy-7-methyl-1-phenyloctan-3-one (**28**)

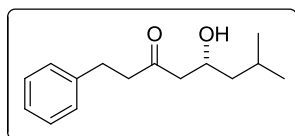

Prepared following General Procedure A. The crude product was purified by flash chromatography (hexanes-EtOAc 9:1) to afford (*R*)-5-hydroxy-7-methyl-1-phenyloctan-3-one (**28**) (20 mg, 95%) as a white solid.

mp 163-164 °C

IR (neat): 3442, 3027, 2955, 2928, 2869, 1707, 1496, 748, 699 cm<sup>-1</sup>

<sup>1</sup>H NMR (400 MHz, CDCl<sub>3</sub>) δ: 7.32-7.26 (m, 2H), 7.23-7.16 (m, 3H), 4.12 (m, 1H), 2.95-2.87 (m, 3H), 2.80-2.75 (m, 2H), 2.56 (dd, *J* = 3.2, 17.4 Hz, 1H), 2.49 (dd, *J* = 8.6, 17.4 Hz, 1H), 1.78 (m, 1H), 1.46 (ddd, *J* = 5.5, 8.6, 13.9 Hz, 1H), 1.12 (dddd, *J* = 0.6, 4.5, 8.6, 13.9 Hz, 1H), 0.93 (d, *J* = 0.6 Hz, 3H), 0.91 (d, *J* = 0.6 Hz, 3H).

<sup>13</sup>C NMR (100 MHz, CDCl<sub>3</sub>) δ: 211.2, 140.7, 128.6, 128.3, 126.2, 65.7, 49.8, 45.6, 45.1, 29.5, 24.4, 23.3, 22.0.

HRMS: *m/z* calcd for C<sub>15</sub>H<sub>23</sub>O<sub>2</sub>: 235.1693 (M+H); Found: 235.1694 (M+H)

[α]<sub>D</sub><sup>20</sup> = + 22.6° (c 0.53, CHCl<sub>3</sub>)

Determination of enantiomeric excess for (*R*)-5-hydroxy-7-methyl-1-phenyloctan-3-one (**28**).

Samples of both 'racemic'<sup>4,5</sup> and optically enriched (*R*)-5-hydroxy-7-methyl-1-phenyloctan-3-one (**28**) were analyzed by chiral HPLC using a DAICEL-CHIRALCEL-OD column. Eluent = hexanes:IPA 20:1; detection at 205 nm; flow rate = 1.2 mL/min. The retention time of the (+)-enantiomer is 10.21 min; the retention time of the (-)-enantiomer is 6.95 min. (see chromatograms below).



### (*R*)-4-hydroxy-2-methylpentadecan-6-one (**29**)

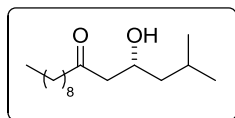

Prepared following General Procedure A. The crude product was purified by flash chromatography (hexanes-EtOAc 9:1) to afford (*R*)-4-hydroxy-2-methylpentadecan-6-one (**29**) (57 mg, 81%) as a colourless oil.

IR (neat): 3439, 2955, 2925, 2855, 1707, 1466, 1358, 840 cm<sup>-1</sup>

<sup>1</sup>H NMR (400 MHz, CDCl<sub>3</sub>) δ: 4.12 (m, 1H), 3.06 (d, *J* = 3.3 Hz, 1H), 2.58 (dd, *J* = 2.6, 17.6 Hz, 1H), 2.48 (dd, *J* = 9.1, 17.6 Hz, 1H), 2.41 (t, *J* = 7.4 Hz, 2H), 1.79 (m, 1H), 1.61-1.52 (m, 2H), 1.46 (m, 1H), 1.30-1.20 (m, 12H), 1.11 (m, 1H), 0.91 (d, *J* = 1.8 Hz, 3H), 0.90 (d, *J* = 1.8 Hz, 3H), 0.87 (t, *J* = 6.7 Hz, 3H)

<sup>13</sup>C NMR (100 MHz, CDCl<sub>3</sub>) δ: 213.4, 66.5, 50.2, 46.3, 44.5, 31.6, 30.2, 30.1, 30.0, 29.9, 25.1, 24.4, 24.1, 23.4, 22.8

HRMS: *m/z* calcd for C<sub>16</sub>H<sub>32</sub>O<sub>2</sub>: 257.2467 (M+H); Found: 257.2475 (M+H).

[α]<sub>D</sub><sup>20</sup> = + 30.0° (c 0.3, CHCl<sub>3</sub>)

Determination of enantiomeric excess for (*R*)-4-hydroxy-2-methylpentadecan-6-one (**29**).

Samples of both 'racemic'<sup>4,5</sup> and optically enriched (*R*)-4-hydroxy-2-methylpentadecan-6-one (**29**) were analyzed by chiral GC using an Agilent 6890 gas chromatograph, equipped with a flame ionization detector and a custom-made chiral GC column coated with a 1:1 mixture of heptakis-(2,6-di-*O*-methyl-3-*O*-pentyl)-beta-cyclodextrin and OV-1701. Temperature program: 140 °C isothermal, split injection. The retention time of the (+)-enantiomer is 89.7 min; the retention time of the (-)-enantiomer is 88.3 min.

### (+)-Dihydroyashabushiketol (**32**)

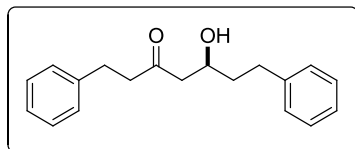

Prepared following General Procedure A. The crude product was purified by flash chromatography (hexanes-EtOAc 9:1) to afford (+)-dihydroyashabushiketol (**32**) (28 mg, 96%) as a white solid. The spectral data acquired on this material was in complete agreement with that reported.<sup>6</sup>

mp 62-65 °C

IR (neat): 3439, 3026, 2926, 2860, 1709, 1603, 1495, 1453, 1406, 1371, 1096, 748, 699  $\text{cm}^{-1}$

<sup>1</sup>H NMR (400 MHz,  $\text{CDCl}_3$ )  $\delta$ : 7.36-7.30 (m, 4H), 7.26-7.19 (m, 6H), 4.10 (m, 1H), 2.95 (t,  $J = 7.4$  Hz, 2H), 2.89-2.67 (m, 5H), 2.60-2.56 (m, 2H), 1.89-1.80 (m, 1H), 1.77-1.67 (m, 1H).

<sup>13</sup>C NMR (100 MHz,  $\text{CDCl}_3$ )  $\delta$ : 211.1, 141.8, 140.7, 128.6, 128.5, 128.4, 128.3, 126.3, 125.9, 66.9, 49.3, 45.0, 38.0, 31.7, 29.5.

HRMS:  $m/z$  calcd for  $\text{C}_{19}\text{H}_{22}\text{O}_2$ : 305.1509 (M+Na); Found: 305.1512 (M+Na).

$[\alpha]_D^{20} = +14.6^\circ$  (c 0.75,  $\text{CHCl}_3$ )

Determination of enantiomeric excess for dihydroyashabushiketol (**32**).

Samples of both 'racemic'<sup>4,5</sup> and optically enriched dihydroyashabushiketol (**32**) were converted into the corresponding benzoyl esters (5 equiv. benzoyl chloride, 10 equiv. pyridine,  $\text{CH}_2\text{Cl}_2$ , 14 h, room temperature). The corresponding enantiomeric benzoyl esters of dihydroyashabushiketol (**32**) were separable by chiral HPLC using a DAICEL-CHIRALCEL-OD column. Eluent = hexanes:IPA 90:10; detection at 230 nm; flow rate = 1.5 mL/min. The retention time of the (+)-enantiomer is 8.39 min; the retention time of the (-)-enantiomer is 9.54 min. (see chromatograms below).

6. Romanski, J.; Nowak, P.; Chapuis, C., Jurczak, J. *Tetrahedron: Asymmetry*, **2011**, *22*, 787

### (+/-)-(4*R*,3*S*)-4-chloro-3-hydroxy-5-methylhexanenitrile (**14**)

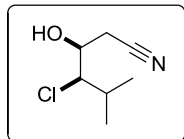

Prepared following General Procedure B. The crude product (4:1 d.r.) was purified by flash chromatography (hexanes-EtOAc 9:1) to afford (+/-)-(4*R*,3*S*)-4-chloro-3-hydroxy-5-methylhexanenitrile (**14**) (121 mg, 54%, 8:1 *dr*) as a colourless oil.

IR (neat): 3443, 2969, 2937, 2878, 2257, 1636, 1464, 1414, 1389, 1371, 1063, 821, 758, 739  $\text{cm}^{-1}$

$^1\text{H}$  NMR (400 MHz,  $\text{CDCl}_3$ )  $\delta$ : 4.08 (dt,  $J = 7.3, 3.8$  Hz, 1H), 3.84 (dd,  $J = 8.1, 4.1$  Hz, 1H), 2.88 (dd,  $J = 16.7, 3.6$  Hz, 1H), 2.77 (dd,  $J = 16.7, 7.3$  Hz, 1H), 2.31 (m, 1H), 1.08 (d,  $J = 6.7$  Hz, 3H), 1.01 (d,  $J = 6.7$  Hz, 3H).

$^{13}\text{C}$  NMR (100 MHz,  $\text{CDCl}_3$ )  $\delta$ : 117.2, 70.7, 69.1, 29.4, 23.9, 20.5, 16.1.

HRMS:  $m/z$  calcd for  $\text{C}_7\text{H}_{12}\text{ClNO}$ : 184.0500 (M+Na); Found: 184.0504 (M+Na).

### (+/-)-(3*R*)-3-hydroxy-5-methylhexanenitrile (**19**)

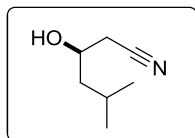

Prepared following General Procedure A. The crude product was purified by flash chromatography (hexanes-EtOAc 4:1) to afford (+/-)-(3*R*)-3-hydroxy-5-methylhexanenitrile (**19**) (33 mg, 70%) as a colourless oil.

IR (neat): 3437, 2959, 2932, 2872, 2252, 1469, 1416, 1369, 1224, 1078, 1023, 612  $\text{cm}^{-1}$

$^1\text{H}$  NMR (600 MHz,  $\text{CDCl}_3$ )  $\delta$ : 4.02 (m, 1H), 2.57 (dd,  $J = 16.7, 4.7$  Hz, 1H), 2.47 (dd,  $J = 16.7, 6.3$  Hz, 1H), 2.29 (s, 1H), 1.79 (m, 1H), 1.57 (m, 1H), 1.36 (m, 1H), 0.97-0.91 (m, 6H).

$^{13}\text{C}$  NMR (150 MHz,  $\text{CDCl}_3$ )  $\delta$ : 117.8, 65.9, 45.5, 26.6, 24.5, 23.1, 21.8.

HRMS:  $m/z$  calcd for  $\text{C}_7\text{H}_{13}\text{NO}$ : 150.0889 (M+Na); Found: 150.0893 (M+Na).

### (+/-)-(4*R*,3*S*)-4-chloro-3-hydroxy-5-(2-methylnaphthalen-1-yl)pentanenitrile (**11**)

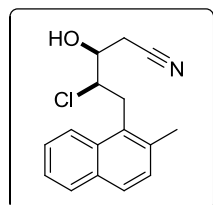

Prepared following General Procedure B. Analysis of the crude reaction product indicated that the ratio of diastereomeric chlorohydrins was 2:1. The major (1,2-*anti*) chlorohydrin was purified by flash chromatography (hexanes:EtOAc: $\text{CH}_2\text{Cl}_2$  9:1:1) to afford (+/-)-(4*R*,3*S*)-4-chloro-3-hydroxy-5-(2-methylnaphthalen-1-yl)pentanenitrile

(11) (378 mg, 53%, 12:1 d.r.) as white solid.

mp 132-136 °C.

IR (neat): 3425, 3052, 2972, 2930, 2870, 2254, 2211, 1729, 1709, 1624, 1599, 1512, 1265, 1076, 955  $\text{cm}^{-1}$

$^1\text{H}$  NMR (400 MHz,  $\text{CDCl}_3$ )  $\delta$ : 7.97 (d,  $J = 8.8$  Hz, 1H), 7.83 (d,  $J = 8.8$  Hz, 1H), 7.71 (d,  $J = 8.4$  Hz, 1H), 7.53 (dt,  $J = 7.6, 1.5$  Hz, 1H), 7.44 (dt,  $J = 7.6, 0.9$  Hz, 1H), 7.33 (d,  $J = 8.4$  Hz, 1H), 4.4 (m, 1H), 4.27 (m, 1H), 3.84 (dd,  $J = 15.0, 4.4$  Hz, 1H), 3.51 (dd,  $J = 15.0, 9.7$  Hz, 1H), 2.91 (dd,  $J = 16.9, 4.0$  Hz, 1H), 2.79 (dd,  $J = 16.9, 8.0$  Hz, 1H), 2.75 (d,  $J = 6.1$  Hz, 1H), 2.58 (s, 3H),

$^{13}\text{C}$  NMR (100 MHz,  $\text{CDCl}_3$ )  $\delta$ : 134.9, 132.7, 132.1, 129.8, 129.3, 129.0, 127.7, 126.6, 124.9, 123.1, 117.1, 71.6, 64.9, 32.6, 23.5, 21.0.

HRMS:  $m/z$  calcd for  $\text{C}_{16}\text{H}_{16}\text{ClNO}$ : 274.0993 (M+H); Found: 274.0998 (M+H).

### (+/-)-(3R)-3-hydroxy-5-(2-methylnaphthalen-1-yl)pentanenitrile (16)

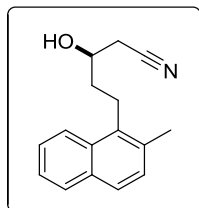

Prepared following General Procedure A. The crude product was purified by flash chromatography (hexanes:EtOAc 4:1) to afford (+/-)-(3R)-3-hydroxy-5-(2-methylnaphthalen-1-yl)pentanenitrile (**16**) (113 mg, 88%) as a colourless oil.

IR (neat): 3453, 3050, 2955, 2924, 2251, 1730, 1707, 1597, 1511, 1414, 1265, 1087, 813  $\text{cm}^{-1}$

$^1\text{H}$  NMR (400 MHz,  $\text{CDCl}_3$ )  $\delta$ : 8.03 (d,  $J = 8.5$  Hz, 1H), 7.82 (d,  $J = 8.0$  Hz, 1H), 7.66 (d,  $J = 8.4$  Hz, 1H), 7.52 (dt,  $J = 7.24, 1.15$  Hz, 1H), 7.43 (t,  $J = 7.24$  Hz, 1H), 7.32 (d,  $J = 8.4$  Hz, 1H), 4.11 (m, 1H), 3.31 (m, 1H), 3.16 (m, 1H), 2.60-2.55 (m, 2H), 2.53 (s, 3H), 1.94-1.88 (m, 2H).

$^{13}\text{C}$  NMR (100 MHz,  $\text{CDCl}_3$ )  $\delta$ : 134.0, 133.2, 132.8, 132.06, 129.4, 126.7, 126.3, 124.8, 123.3, 117.7, 67.9, 60.6, 36.6, 26.5, 24.4, 20.3.

HRMS:  $m/z$  calcd for  $\text{C}_{16}\text{H}_{17}\text{NO}$ : 240.1383 (M+H); Found: 240.1355 (M+H).

**(+/-)-(2R)-2-((1'S,2'R)-2'-chloro-1'-hydroxypentyl)cyclohexanone (12)**

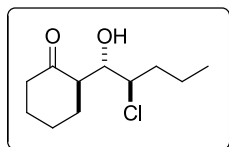

To a cold (-78 °C), stirred 0.2 M solution of diisopropylamine (1.1 equiv) in THF was added *n*-BuLi (1.1 equiv, 2.5 M in hexanes). This mixture was allowed to warm to 0 °C and was stirred at this temperature for 20 minutes prior to cooling to -78 °C, at which temperature a solution of cyclohexanone (1.0 equiv) in THF (1 ml) was added. After an additional 30 minutes of stirring at -78 °C, a solution of the 2-chloropentanal (1.3 equiv) in THF was slowly added to the reaction mixture. After a further 20 minutes stirring at -78 °C, the reaction mixture was quenched by the addition of saturated aqueous NH<sub>4</sub>Cl, diluted with EtOAc, the phases were separated, and the aqueous phase was washed with EtOAc (3 x 30 ml). The combined organic phases were washed with brine, dried (MgSO<sub>4</sub>), and concentrated to provide a crude oil. Purification of the crude product was carried out by flash chromatography (hexanes-CH<sub>2</sub>Cl<sub>2</sub>-EtOAc 9:2:1) to afford (+/-)-(2R)-2-((1'S,2'R)-2'-chloro-1'-hydroxypentyl)cyclohexanone (**12**) (56%, 9:1 d.r.) as a colourless oil.

IR (neat): 3508, 2959, 2938, 2870, 1696, 1450, 1312, 1132, 1082, 974 cm<sup>-1</sup>

<sup>1</sup>H NMR (400 MHz, CDCl<sub>3</sub>) δ: 4.09 (dt, *J* = 8.7, 2.5 Hz, 1H), 3.43 (m, 1H), 3.36 (d, *J* = 10.1 Hz, 1H), 3.01 (ddd, *J* = 12.4, 5.4, 3.1 Hz, 1H), 2.40-2.33 (m, 2H), 2.14-2.0 (m, 3H), 1.96-1.55 (m, 6H), 1.41 (m, 1H), 0.95 (t, *J* = 7.4 Hz, 3H).

<sup>13</sup>C NMR (100 MHz, CDCl<sub>3</sub>) δ: 216.3, 77.1, 64.5, 51.4, 43.1, 36.0, 33.0, 28.5, 25.6, 19.7, 13.6

HRMS: *m/z* calcd for C<sub>11</sub>H<sub>19</sub>ClO<sub>2</sub>: 219.1146 (M+H); Found: 219.1138 (M+H).

Proof of the relative stereochemistry of **12** was accomplished as follows.

A purified sample of **12** was reduced (catecholborane (1.2 eq.), THF) and subsequently converted to the corresponding epoxide (2M NaOH (1.2 eq), EtOH). Analysis of the <sup>1</sup>H NMR spectrum recorded on the epoxide revealed that the two epoxide protons resonated at 2.94 and 2.82 ppm, and shared a coupling constant of 2.5 Hz, typical of a *trans* epoxide. Additionally, irradiation of either proton resonance did not result in an enhancement of the other proton resonance in nOe experiments. These results confirm the *anti* stereochemistry of the chlorohydrin function in **12**.

As described below, reduction of the chloromethine function in **12** afforded the β-hydroxyketone **17**. The spectral data recorded on **17** was consistent with that reported for structurally related *anti*-aldol adducts of cyclohexanone (see below for details).

### (+/-)-(2*R*)-2-(1'*R*)-(1'-hydroxypentyl)cyclohexanone (**17**)

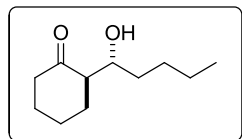

Prepared following General Procedure A. The crude product was purified by flash chromatography (hexanes-EtOAc 9:1) to afford (+/-)-(2*R*)-2-(1'*R*)-(1'-hydroxypentyl)cyclohexanone (**17**) (74%) as a colourless oil. The spectral data derived from compound **17** matched closely to that reported for (2*R*)-2-(1'*R*)-(1'-hydroxydecyl)cyclohexanone.<sup>7</sup> Based on these spectral similarities, the relative stereochemistry for compound **17** was assigned as depicted above and in the manuscript.

IR (neat): 3528, 2936, 2861, 1697, 1449, 1403, 1312, 969 cm<sup>-1</sup>

<sup>1</sup>H NMR (400 MHz, CDCl<sub>3</sub>) δ: 3.73 (m, 1H), 3.42 (d, *J* = 4.3 Hz, 1H), 2.44-2.26 (m, 3H), 2.14-2.05 (m, 2H), 1.91 (m, 1H), 1.74-1.61 (m, 2H), 1.56-1.24 (m, 9H).

<sup>13</sup>C NMR (100 MHz, CDCl<sub>3</sub>) δ: 215.9, 71.5, 55.9, 42.9, 33.3, 30.8, 27.8, 27.4, 25.0, 22.8, 14.1.

HRMS: *m/z* calcd for C<sub>11</sub>H<sub>20</sub>O<sub>2</sub>: 185.1497 (M+H); Found: 185.1536 (M+H).

### (+/-)-(4*R*)-4-((1'*S*,2'*R*)-2'-chloro-1'-hydroxypentyl)-2,2-dimethyl-1,3-dioxan-5-one (**13**)

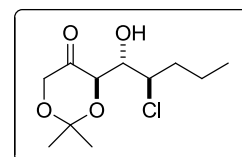

To a cold (-78 °C), stirred solution of diisopropylamine (0.065 ml, 1.1 equiv) in THF (5 ml) was added *n*-BuLi (0.18 ml, 1.1 equiv, 2.5 M in hexanes). This mixture was allowed to warm to 0 °C and was stirred at this temperature for 20 minutes prior to cooling to -78 °C, at which temperature a solution of 2,2-dimethyl-1,3-dioxan-5-one (0.046 ml, 1.0 equiv) in THF (1 ml) was added. After an additional 5 minutes of stirring at -78 °C, a solution of 2-chloropentanal (0.082 g, 1.5 equiv) in THF was slowly added to the reaction mixture. After a further 15 minutes stirring at -78 °C, the reaction mixture was quenched by the slow addition of water (5 ml), diluted with EtOAc, the phases were separated, and the aqueous phase was washed with EtOAc (3 x 10 ml). The combined organic phases were washed with brine, dried (MgSO<sub>4</sub>), and concentrated to provide a crude oil. Purification of the crude product was carried out by flash chromatography (hexanes-

7. The protons H-1' and OH in the 1,2-*anti*-diastereomer of 2-(1'-hydroxydecyl)cyclohexanone resonate at δ 3.72 (m) and 3.41 (d, *J* = 4.0 Hz) ppm, respectively, which is consistent with the spectral data for compound **17**. The proton H-1' in the *syn*-diastereomer of 2-(1'-hydroxydecyl)cyclohexanone resonates at 4.15 ppm. For details, see: Estevez, R. E.; Paradas, M.; Millan, A.; Jimenez, T.; Robles, R.; Cuerva, J. M.; Oltra, J. E. *J. Org. Chem.* **2008**, *73*, 1616.

CH<sub>2</sub>Cl<sub>2</sub>-EtOAc 9:2:1) to afford (+/-)-(4*R*)-4-((1'*S*,2'*R*)-2'-chloro-1'-hydroxypentyl)-2,2-dimethyl-1,3-dioxan-5-one (**13**) (0.051 g, 54%) as a colourless oil.

IR (neat) 3512, 2964, 1749, 1374, 1226, 1100, 864 cm<sup>-1</sup>

<sup>1</sup>H-NMR: (400 MHz, CDCl<sub>3</sub>): δ 4.46 (dd, *J* = 6.7, 1.4 Hz, 1H), 4.30 (dd, *J* = 17.4, 1.4 Hz, 1H), 4.27-4.21 (m, 1H), 4.10-4.05 (m, 1H), 4.06 (d, *J* = 17.4 Hz, 1H), 3.08 (d, *J* = 4.0 Hz, 1H), 1.83-1.77 (m, 2H), 1.70-1.59 (m, 2H), 1.49 (s, 3H), 1.45 (s, 3H), 0.95 (t, *J* = 7.3 Hz, 3H)

<sup>13</sup>C-NMR: (150 MHz, CDCl<sub>3</sub>): δ 210.1, 101.4, 74.1, 66.9, 62.7, 34.9, 24.0, 23.9, 19.8, 13.6

HRMS: *m/z* calcd for C<sub>11</sub>H<sub>19</sub>ClO<sub>4</sub>: 251.1045 (M+H); Found: 251.1036 (M+H).

Proof of the relative stereochemistry of **13** was accomplished as follows.

A purified sample of **13** was reduced (catecholborane (1.2 eq.), THF) and subsequently converted into the corresponding epoxide (2M NaOH (1.2 eq), EtOH). Analysis of the <sup>1</sup>H NMR spectrum recorded on the epoxide revealed that the two epoxide protons resonated at 2.96 and 2.93 ppm, and shared a coupling constant of 2.2 Hz, typical of a *trans* epoxide. Additionally, irradiation of either proton resonance did not result in an enhancement of the other proton resonance in nOe experiments. These results confirm the *anti* stereochemistry of the chlorohydrin function in **13**.

As described below, reduction of the chloromethine function in **13** afforded the β-hydroxyketone **18**. The spectral data recorded on **18** was consistent with that reported for structurally related *anti*-aldol adducts of 2,2-dimethyl-1,3-dioxan-5-one (see below for details)

#### (+/-)-(4*R*)-4-(1'*R*)-1'-hydroxypentyl)-2,2-dimethyl-1,3-dioxan-5-one (**18**)

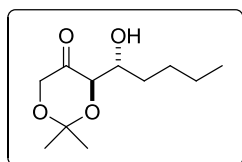

Prepared following General Procedure A. The crude product was purified by flash chromatography (hexanes-EtOAc 9:1) to afford (+/-)-(4*R*)-4-((1'*R*\*)-1'-hydroxypentyl)-2,2-dimethyl-1,3-dioxan-5-one (**18**) (24 mg, 74%) as a colourless oil. The spectral data derived from compound **18** matched closely to that reported for (4*R*)-4-((1'*R*\*)-1'-

hydroxybutyl)-2,2-dimethyl-1,3-dioxan-5-one.<sup>8</sup> Based on these spectral similarities, the relative stereochemistry for compound **18** was assigned as depicted above and in the manuscript.

IR (neat): 3524, 2988, 2957, 2936, 2873, 1742, 1376, 1093, 862 cm<sup>-1</sup>

<sup>1</sup>H NMR (400 MHz, CDCl<sub>3</sub>) δ: 4.26 (dd, *J* = 17.2, 1.3 Hz, 1H), 4.09 (dd, *J* = 7.1, 1.3 Hz, 1H), 4.02 (d, *J* = 17.2 Hz, 1H), 3.89 (m, 1H), 2.94 (d, *J* = 3.9 Hz, 1H), 1.64 (m, 1H), 1.54-1.51 (m, 2H), 1.49 (s, 3H), 1.45 (s, 3H), 1.41-1.30 (m, 3H), 0.92 (t, *J* = 7.1 Hz, 3H).

<sup>13</sup>C NMR (100 MHz, CDCl<sub>3</sub>) δ: 211.5, 100.9, 75.9, 70.9, 66.8, 31.9, 27.4, 24.0, 23.5, 22.6, 14.4

HRMS: *m/z* calcd for C<sub>11</sub>H<sub>20</sub>O<sub>4</sub>: 217.1434 (M+H); found: 217.1430 (M+H).

### 3-(2-methylnaphthalen-1-yl)propanal (**34**)

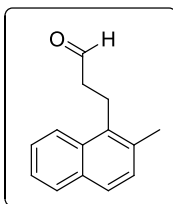

1-bromo-2-methylnaphthalene (0.2 ml, 1.3 mmol), allyl alcohol (0.13 ml, 1.9 mmol), and sodium bicarbonate (130 mg, 1.5 mmol) were added to *N*-methylpyrrolidinone (2.5 ml) and the suspension was sparged with N<sub>2</sub> for 20 minutes. Pd(PPh<sub>3</sub>)<sub>2</sub>Cl<sub>2</sub> (89 mg, 0.13 mmol) was then added and the solution was sparged with N<sub>2</sub> for a further 5 minutes. The nitrogen inlet was removed and the reaction vial was sealed and heated at 140 °C for 4.5 hours. The reaction vessel was then cooled to room temperature and the reaction mixture was filtered through a pad of Celite®, the organic layer extracted with ethyl acetate (2 x 15 ml), and the combined extracts were washed with brine (3 x 20 ml), dried (MgSO<sub>4</sub>), and concentrated via rotary evaporator to yield an orange oil. Purification of the crude product by column chromatography (hexanes-ethyl acetate 20:1) gave the aldehyde **34** as a colorless oil (251 mg, 89%). The spectral data recorded for this material was in complete agreement with that reported.<sup>9</sup>

8. The protons H-4, H6a, H6b, and H1' in the 1,2-*anti*-diastereomer of 4-(1'-hydroxybutyl)-2,2-dimethyl-1,3-dioxan-5-one resonate at δ 4.08, 4.25, 4.01, and 3.89 ppm, respectively, which is consistent with the spectral data for compound **18** (comparison: δ 4.09, 4.26, 4.02, and 3.89 ppm). Likewise, the carbons C4 and C1' resonate at δ 76.07 and 70.34 ppm, respectively in the <sup>13</sup>C NMR spectrum of 4-(1'-hydroxybutyl)-2,2-dimethyl-1,3-dioxan-5-one, which compare well with compound **18** (δ 75.9 and 70.9). For details, see: Enders, D.; Prokopenko, O. F.; Raabe, G.; Runsink, J. *Synthesis*, **1996**, 1095.

9. Binder, J. T.; Kirsch, S. F. *Chem. Comm.* **2007**, 4164.



### (2*R*)-2-chloro-3-(2-methylnaphthalen-1-yl)propanal (**36**)

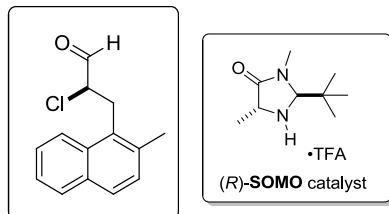

To a cold (-30 °C), stirred solution of (*R*)-SOMO catalyst<sup>10</sup> (42 mg, 0.20 mmol), Cu(TFA)<sub>2</sub> (89 mg, 0.49 mmol), LiCl (63 mg, 1.5 mmol), and Na<sub>2</sub>S<sub>2</sub>O<sub>8</sub> (215 mg, 0.98 mmol) in CH<sub>3</sub>CN (10 ml) and H<sub>2</sub>O (0.03 ml, 1.9 mmol) was added a solution of the aldehyde **34** (148 mg, 0.747 mmol) in CH<sub>3</sub>CN (1 ml), and the resultant green-yellow mixture was

stirred at -30 °C for 4 days. The reaction mixture was then diluted with H<sub>2</sub>O (1 mL), the organic layer extracted with ethyl acetate (3 x 10 ml) and the combined extracts washed with brine (1 x 20 ml), dried (MgSO<sub>4</sub>) and concentrated to yield an orange oil. Purification of the crude product by column chromatography (hexanes-ethyl acetate 4:1) gave (*2R*)-2-chloro-3-(2-methylnaphthalen-1-yl)propanal (**36**) (82 mg, 47%, 66% based on recovered starting material), as a yellow oil. The enantiomeric excess of this material was determined to be ≥ 94% following its conversion to (+)-solistatin (see below).

IR (neat): 3051, 2958, 2929, 2870, 1731, 1623, 1598, 1512, 1443, 1265, 1067, 811, 741 cm<sup>-1</sup>

<sup>1</sup>H NMR (400 MHz, CDCl<sub>3</sub>) δ: 9.63 (d, *J* = 2.3 Hz, 1H), 7.92 (d, *J* = 8.5 Hz, 1H), 7.84 (d, *J* = 8.2 Hz, 1H), 7.72 (d, *J* = 8.4 Hz, 1H), 7.53 (dt, *J* = 7.6, 1.3 Hz, 1H), 7.45 (dt, *J* = 7.6, 0.8 Hz, 1H), 7.33 (d, *J* = 8.4 Hz, 1H), 4.58 (dt, *J* = 7.6, 2.2 Hz, 1H), 3.89 (dd, *J* = 15.0, 6.2 Hz, 1H), 3.62 (dd, *J* = 15.0, 8.2 Hz, 1H), 2.56 (s, 3H).

<sup>13</sup>C NMR (100 MHz, CDCl<sub>3</sub>) δ: 194.6, 135.2, 132.8, 132.1, 129.4, 129.2, 128.6, 126.8, 125.1, 122.9, 63.8, 31.4, 21.0.

HRMS: *m/z* calcd for C<sub>14</sub>H<sub>13</sub>ClO: 255.0547 (M+Na); Found: 255.0545 (M+Na).

[α]<sub>D</sub><sup>20</sup> = + 32.4° (c 0.34, CHCl<sub>3</sub>)

10. Amatore, M.; Beeson, T. D.; Brown, S. P.; MacMillan, D. W. C. *Angew. Chem., Int. Ed.* **2009**, *48*, 5121. For preparation of the SOMO catalyst, see: Graham, T. H.; Horning, B. D.; MacMillan, D. W. C. *Org. Synth.* **2011**, *88*, 42.

## Chlorohydrin **38**

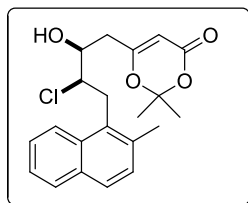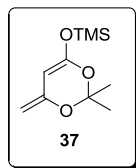

To cold (-60 °C), stirred a solution of (2*R*)-2-chloro-3-(2-methylnaphthalen-1-yl)propanal (**36**) (76 mg, 0.33 mmol, 1 equiv) in dry CH<sub>2</sub>Cl<sub>2</sub> (3 ml) was added BF<sub>3</sub>•OEt<sub>2</sub> (0.12 ml, 0.95 mmol) and the resultant orange solution was stirred for 10 minutes. Silyl enol ether **37**<sup>11</sup> was then added neat (140 mg, 0.66 mmol), and the resulting colourless solution was stirred at -60 °C for 18 hours. H<sub>2</sub>O (5 ml) was then added, and the reaction mixture was allowed to slowly warm to room temperature. The phases were separated and the aqueous phase was washed with CH<sub>2</sub>Cl<sub>2</sub> (3 x 10 ml), and the combined organic washes were extracted with brine (1 x 10 ml), dried (MgSO<sub>4</sub>), and concentrated to provide a crude 2:1 mixture of 1,2-*anti* and 1,2-*syn* chlorohydrins. Purification of the of the crude products by flash chromatography (hexanes-CH<sub>2</sub>Cl<sub>2</sub>-EtOAc 9:2:1; 2 columns required to completely separate diastereomers) afforded chlorohydrin **38** as a white solid (78 mg, 63 %).

mp 32-35 °C

IR (neat): 3413, 3057, 2992, 2948, 1709, 1634, 1511, 1391, 1378, 1275, 1203, 1015, 810, 738 cm<sup>-1</sup>

<sup>1</sup>H NMR (400 MHz, CDCl<sub>3</sub>) δ: 7.96 (d, *J* = 8.4 Hz, 1H), 7.84 (d, *J* = 8.1 Hz, 1H), 7.71 (d, *J* = 8.4 Hz, 1H), 7.51 (t, *J* = 7.4 Hz, 1H), 7.44 (t, *J* = 7.4 Hz, 1H), 7.34 (d, *J* = 8.4 Hz, 1H), 5.39 (s, 1H), 4.44 (m, 1H), 4.22 (m, 1H), 3.76 (dd, *J* = 14.9, 4.5 Hz, 1H), 3.54 (dd, *J* = 9.5, 14.9 Hz, 1H), 2.80 (dd, *J* = 14.9, 2.7 Hz, 2H), 2.66-2.57 (m, 2H), 2.59 (s, 3H), 1.72 (s, 3H), 1.71 (s, 3H).

<sup>13</sup>C NMR (100 MHz, CDCl<sub>3</sub>) δ: 168.3, 160.9, 134.9, 132.7, 132.1, 130.3, 129.3, 129.0, 127.5, 126.4, 124.8, 123.1, 106.9, 95.8, 72.0, 66.8, 37.6, 32.3, 25.5, 24.7.

HRMS: *m/z* calcd for C<sub>21</sub>H<sub>23</sub>ClO<sub>4</sub>: 375.1358 (M+H); Found: 3375.1391 (M+H).

[α]<sub>D</sub><sup>20</sup> = - 43.3° (c 0.06, CHCl<sub>3</sub>)

11. Fettes, A.; Carreira, E. M. *J. Org. Chem.* **2003**, *68*, 9274

### Methyl (5*S*,6*R*)-6-chloro-5-hydroxy-7-(2-methylnaphthalen-1-yl)-3-oxoheptanoate (41)

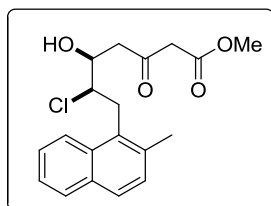

To a stirred solution of anhydrous methanol (0.034 ml, 4 eq.) in toluene (3 ml, 0.07 M) at room temperature was added chlorohydrin **38** (79 mg, 0.21 mmol) and the reaction vessel was sealed and heated to 65 °C in an oil bath and maintained at this temperature for 18 h. Concentration of the crude reaction mixture and purification of the crude product by silica gel chromatography (hexanes-ethyl acetate 4:1) gave methyl (5*S*,6*R*)-6-chloro-5-hydroxy-7-(2-methylnaphthalen-1-yl)-3-oxoheptanoate (**41**) as a colourless oil (61 mg, 83%).

IR (neat): 3477, 3050, 3003, 2955, 2925, 1747, 1713, 1654, 1512, 1437, 1363, 1223, 1092, 814, 531 cm<sup>-1</sup>

<sup>1</sup>H NMR (400 MHz, CDCl<sub>3</sub>) δ: 8.01 (d, *J* = 8.4 Hz, 1H), 7.83 (d, *J* = 8.0 Hz, 1H), 7.70 (d, *J* = 8.4 Hz, 1H), 7.51 (t, *J* = 7.4 Hz, 1H), 7.43 (t, *J* = 7.4 Hz, 1H), 7.33 (d, *J* = 8.4 Hz, 1H), 4.41-4.30 (m, 2H), 3.91 (dd, *J* = 15.2, 3.5 Hz, 1H), 3.77 (s, 3H), 3.54 (d, *J* = 2.0 Hz, 2H), 3.45 (dd, *J* = 15.2, 9.8 Hz, 1H), 3.18 (dd, *J* = 17.8, 2.1 Hz, 1H), 2.97 (dd, *J* = 17.8, 8.5 Hz, 1H), 2.58 (s, 3H)

<sup>13</sup>C NMR (100 MHz, CDCl<sub>3</sub>) δ: 203.0, 167.2, 134.9, 132.6, 132.2, 130.7, 129.3, 128.8, 127.3, 126.2, 124.7, 123.5, 71.4, 65.6, 52.6, 49.6, 46.2, 32.7, 21.0.

HRMS: *m/z* calcd for C<sub>19</sub>H<sub>21</sub>ClO<sub>4</sub>: 349.1201(M+H); Found: 349.1196 (M+H).

[α]<sub>D</sub><sup>20</sup> = - 22.6° (c 0.15, CHCl<sub>3</sub>)

### Methyl (3*R*,5*S*,6*R*)-6-chloro-3,5-dihydroxy-7-(2-methylnaphthalen-1-yl)heptanoate (39)

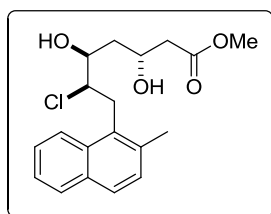

To a stirred solution of triethylborane (0.17 ml, 1.0 M in THF) in THF (5 ml) at room temperature was added methanol (0.4 ml). The resulting solution was stirred for 20 minutes and then cooled to -78 °C. A solution of methyl (5*S*,6*R*)-6-chloro-5-hydroxy-7-(2-methylnaphthalen-1-yl)-3-oxoheptanoate (51 mg, 0.15 mmol) in THF (1 ml) was then added slowly, and the resultant yellow solution was stirred for one hour. Sodium borohydride (11 mg, 0.3 mmol) was then added, and the reaction mixture was stirred for one hour at -78 °C. The reaction mixture was then treated with glacial acetic acid (0.2 ml), followed by water (6 ml), and slowly warmed to room temperature. The phases were separated and the aqueous layer was extracted with ethyl acetate (4 x 15 ml). The combined organic extracts were washed

with saturated aqueous NaHCO<sub>3</sub> (2 x 10 ml) and brine (1 x 10 ml), then dried (MgSO<sub>4</sub>), filtered, and concentrated. The crude product was dissolved in methanol and concentrated (5 x 10 mL) repeatedly [to ensure complete removal of boron reagents via formation and evaporation of trimethylborate] to give the crude diol **39** as a single diastereomer. Purification of the crude product by column chromatography (hexanes-ethyl acetate 3:1) gave methyl (3*R*,5*S*,6*R*)-6-chloro-3,5-dihydroxy-7-(2-methylnaphthalen-1-yl)heptanoate (**39**) as a colourless oil (39 mg, 77%).

IR (neat): 3437, 3051, 2953, 2924, 2853, 1732, 1512, 1438, 1375, 1250, 1072, 1050, 813 cm<sup>-1</sup>

<sup>1</sup>H NMR (400 MHz, CDCl<sub>3</sub>) δ: 8.03 (d, *J* = 8.5 Hz, 1H), 7.81 (d, *J* = 8.1 Hz, 1H), 7.68 (d, *J* = 8.5 Hz, 1H), 7.50 (t, *J* = 7.5 Hz, 1H), 7.42 (d, *J* = 7.5 Hz, 1H), 7.32 (d, *J* = 8.3 Hz, 1H), 4.37 (m, 1H) 4.28 (m, 1H), 4.15 (m, 1H) 4.11 (d, *J* = 2.1 Hz, 1H), 3.89 (dd, *J* = 15.0, 3.6 Hz, 1H), 3.82 (m, 1H), 3.75 (s, 3H) 3.45 (dd, *J* = 15.0, 10.1 Hz, 1H), 2.58 (s, 3H), 2.56 (d, *J* = 1.68 Hz, 1H) 2.10 (m, 1H), 1.78 (m, 1H)

<sup>13</sup>C NMR (100 MHz, CDCl<sub>3</sub>) δ: 173.1, 134.9, 132.6, 132.3, 131.2, 129.3, 128.8, 127.2, 126.2, 124.6, 123.6, 75.6, 68.9, 67.0, 52.0, 41.2, 38.5, 29.7, 21.0.

HRMS: *m/z* calcd for C<sub>19</sub>H<sub>23</sub>ClO<sub>4</sub>: 351.1358 (M+H); Found: 351.1361 (M+H).

[α]<sub>D</sub><sup>20</sup> = - 26.9° (c 0.13, CHCl<sub>3</sub>)

### (+)-Solistatin (40)

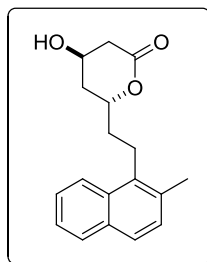

Prepared following General Procedure A. The crude product was flushed through a short plug of silica gel (hexanes-EtOAc 2:1) to provide a mixture of diol (14 mg) and solistatin (6 mg), which was immediately dissolved in CH<sub>2</sub>Cl<sub>2</sub> (2 ml), treated with a catalytic amount of *p*-TsOH and stirred for 4 hours at room temperature. The resulting solution was then treated with saturated NaHCO<sub>3</sub> (3 ml), extracted with CH<sub>2</sub>Cl<sub>2</sub> (3 x 5 ml), washed with brine (5 ml), dried (MgSO<sub>4</sub>), and concentrated. The crude product was purified by flash column chromatography (hexanes:EtOAc 2:1) to provide (+)-solistatin (**40**) (18 mg, 57% yield over 2 steps) as a colourless oil. The spectral data acquired on this material was in complete agreement with that reported for the natural product.<sup>12</sup>

12. Sorensen, D., Larsen, T. O., Christophersen, C., Nielsen, P. H., Anthoni, U., *Phytochem.* **1999**, *51*, 1027.

IR (neat): 3422, 3049, 2956, 2922, 2851, 1709, 1511, 1388, 1256, 1056, 1069, 811, 743  $\text{cm}^{-1}$

$^1\text{H}$  NMR (400 MHz,  $\text{CDCl}_3$ )  $\delta$ : 8.04 (d,  $J = 8.6$  Hz, 1H), 7.81 (d,  $J = 7.9$  Hz, 1H), 7.64 (d,  $J = 8.3$  Hz, 1H), 7.5 (dt,  $J = 7.6, 1.3$  Hz, 1H), 7.41 (t,  $J = 7.6$  Hz, 1H), 7.3 (d,  $J = 8.3$  Hz, 1H), 4.85 (m, 1H), 4.42 (m, 1H), 3.41 (m, 1H), 3.19 (m, 1H), 2.80 (dd,  $J = 17.0, 5.0$  Hz, 1H), 2.67 (ddd,  $J = 17.0, 3.6, 1.6$  Hz, 1H), 2.52 (s, 3H), 2.03-1.98 (m, 2H), 1.93 (m, 1H), 1.86 (dt,  $J = 12.9, 3.3$  Hz, 1H)

$^{13}\text{C}$  NMR (100 MHz,  $\text{CDCl}_3$ )  $\delta$ : 170.1, 134.2, 133.2, 132.6, 132.0, 129.3, 128.7, 126.5, 126.2, 124.6, 123.4, 75.5, 63.0, 38.8, 36.2, 35.7, 24.1, 20.2

HRMS:  $m/z$  calcd for  $\text{C}_{18}\text{H}_{20}\text{O}_3$ : 307.1305 (M+Na); Found: 307.1309 (M+Na).

$[\alpha]_D^{20} = +29.1^\circ$  (c 0.17,  $\text{CHCl}_3$ )

Determination of enantiomeric excess for (+)-solistatin (**40**).

Samples of both 'racemic'<sup>4,5</sup> and optically enriched (+)-solistatin (**40**) were analyzed by chiral HPLC using a DAICEL-CHIRALCEL-OD column. Eluent = hexanes-IPA 92:8; detection at 227 nm; flow rate = 1.5 mL/min. The retention time of the (+)-enantiomer is 15.19 min; the retention time of the (-)-enantiomer is 14.01 min (see chromatogram below).

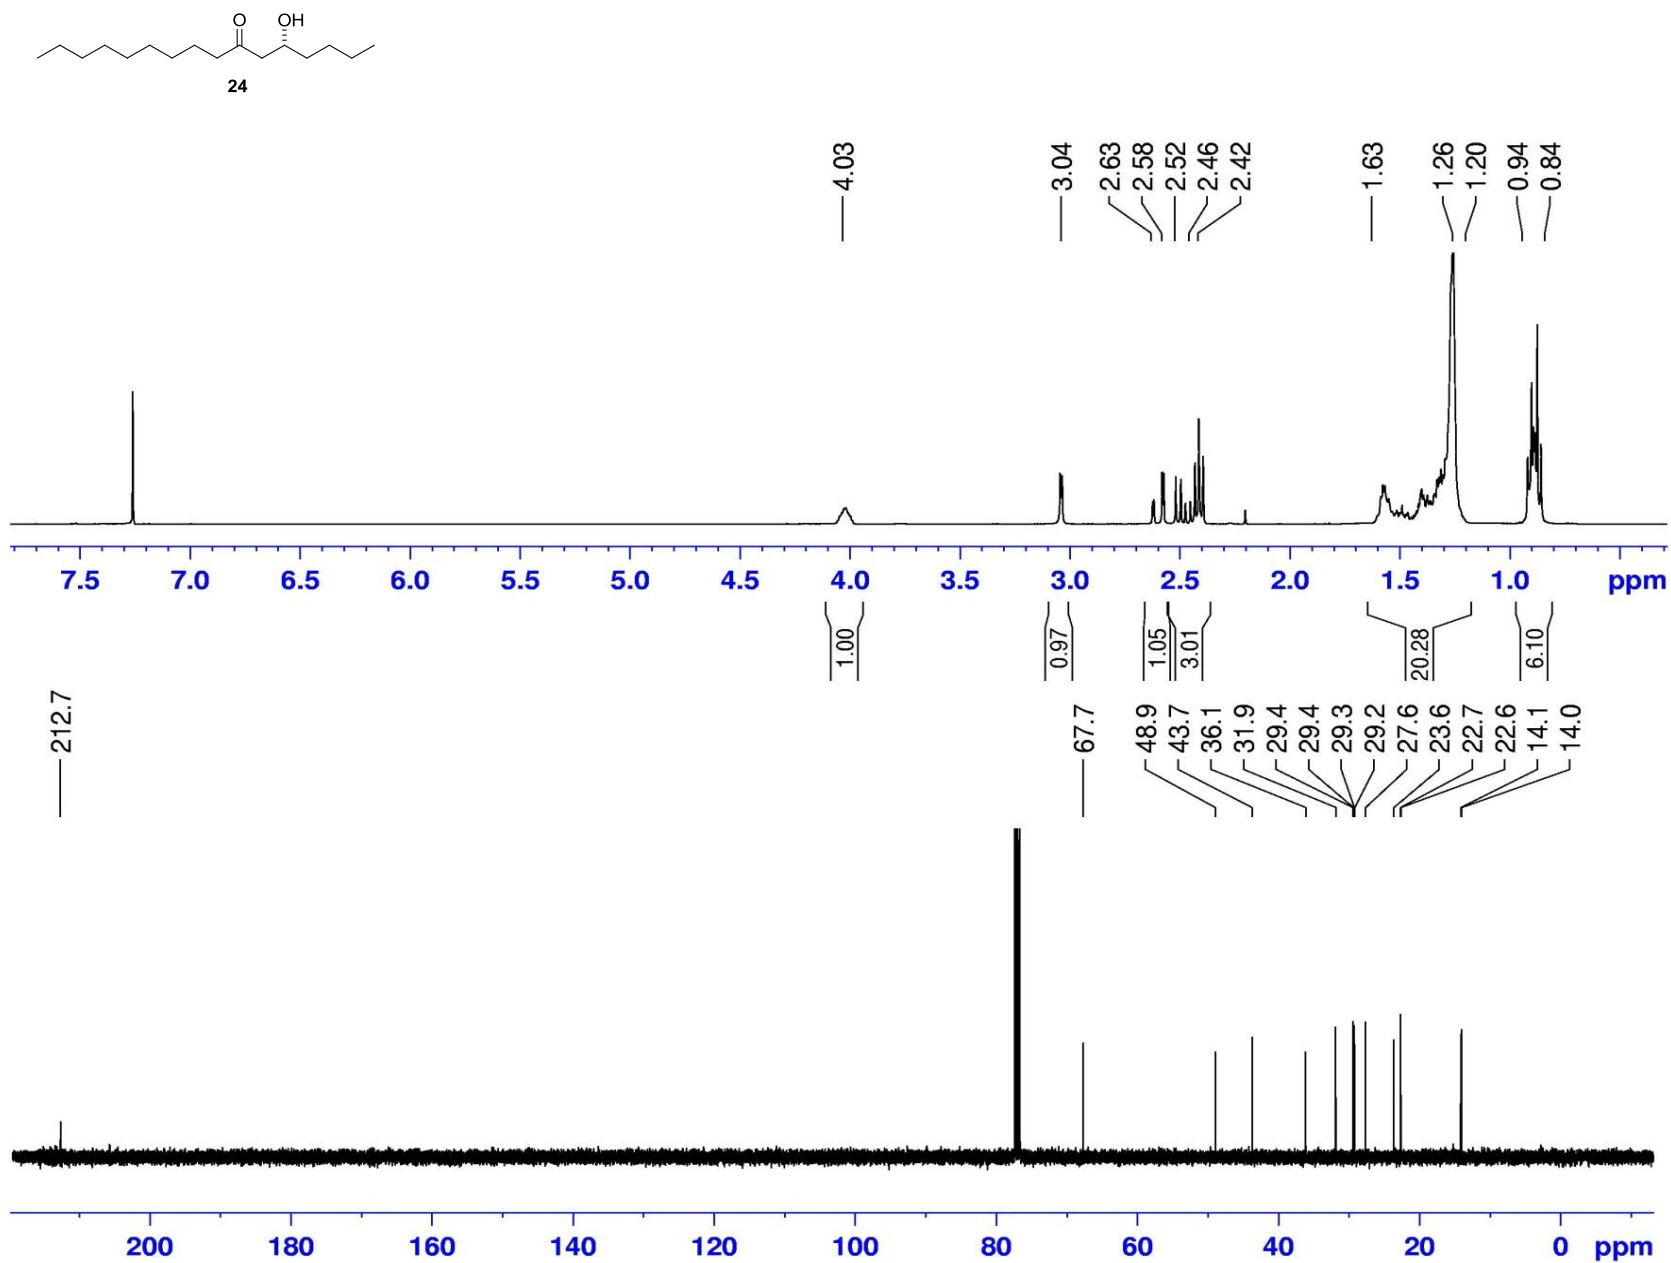

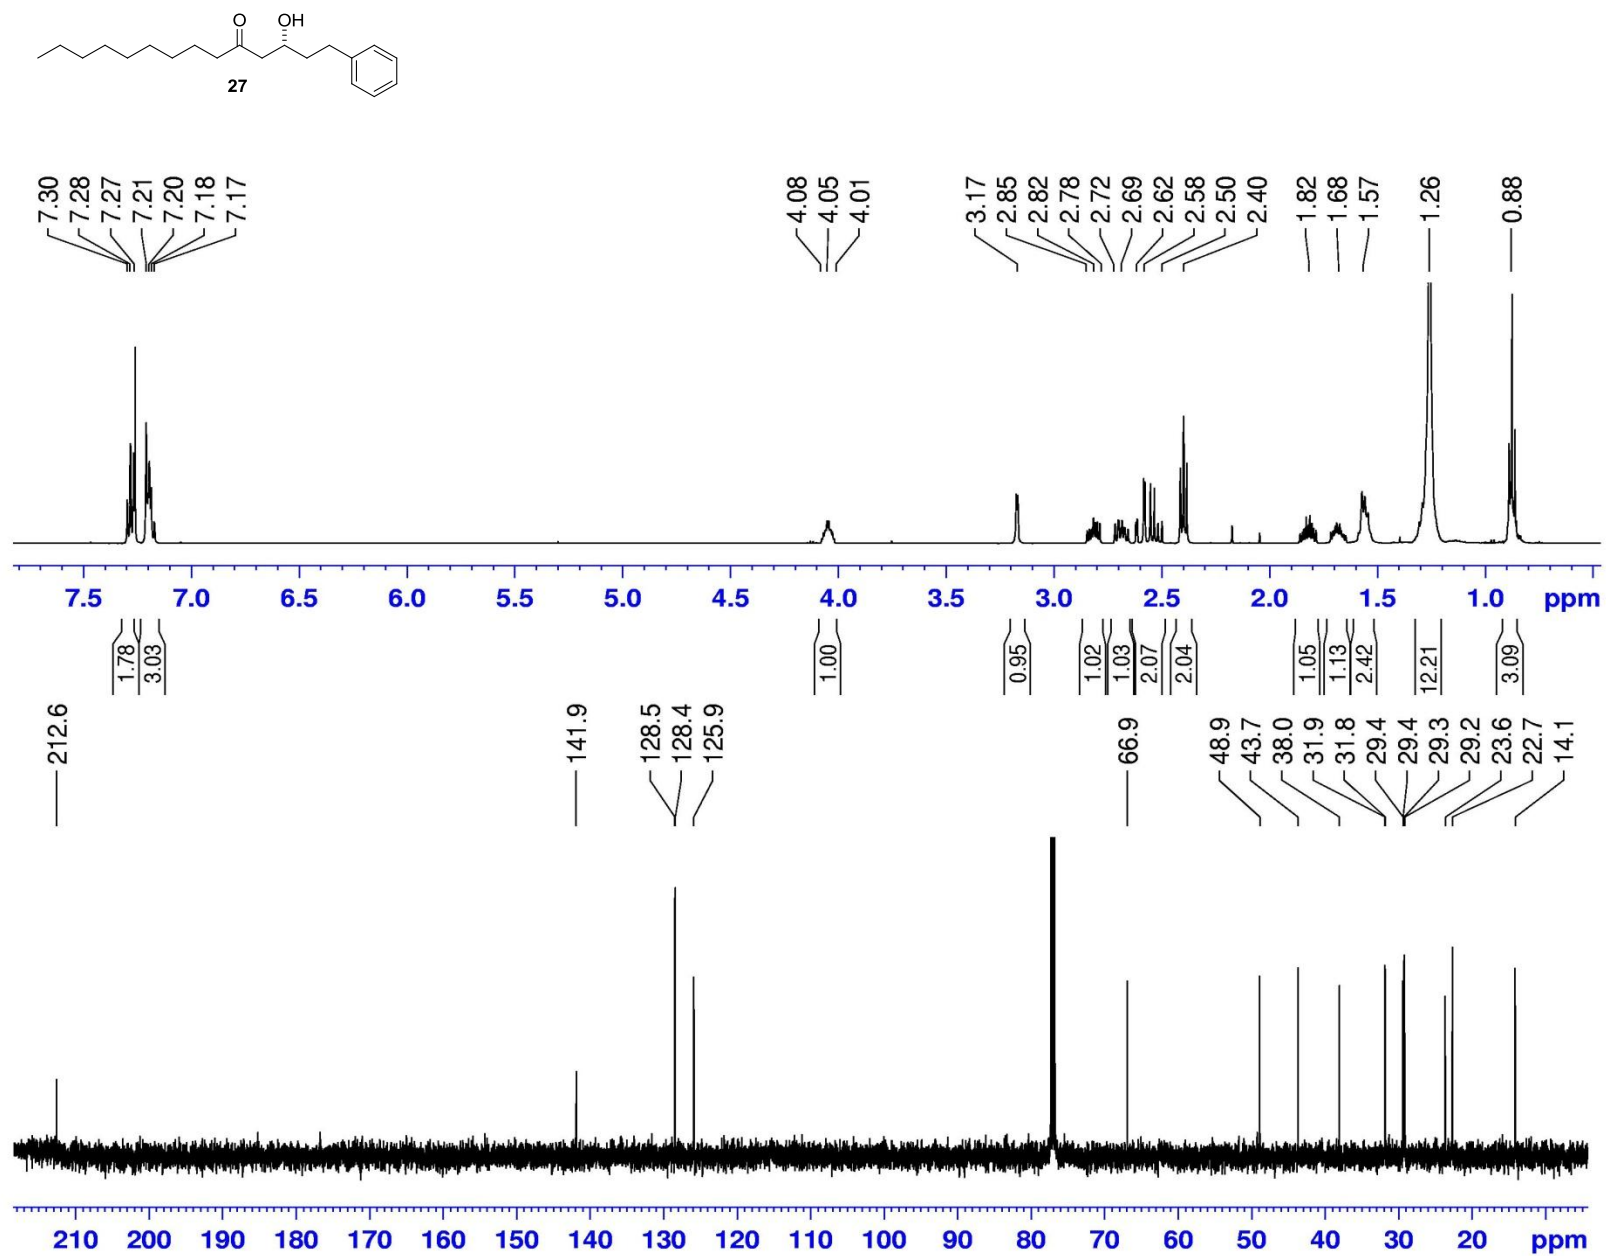

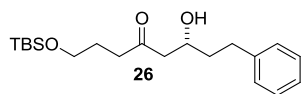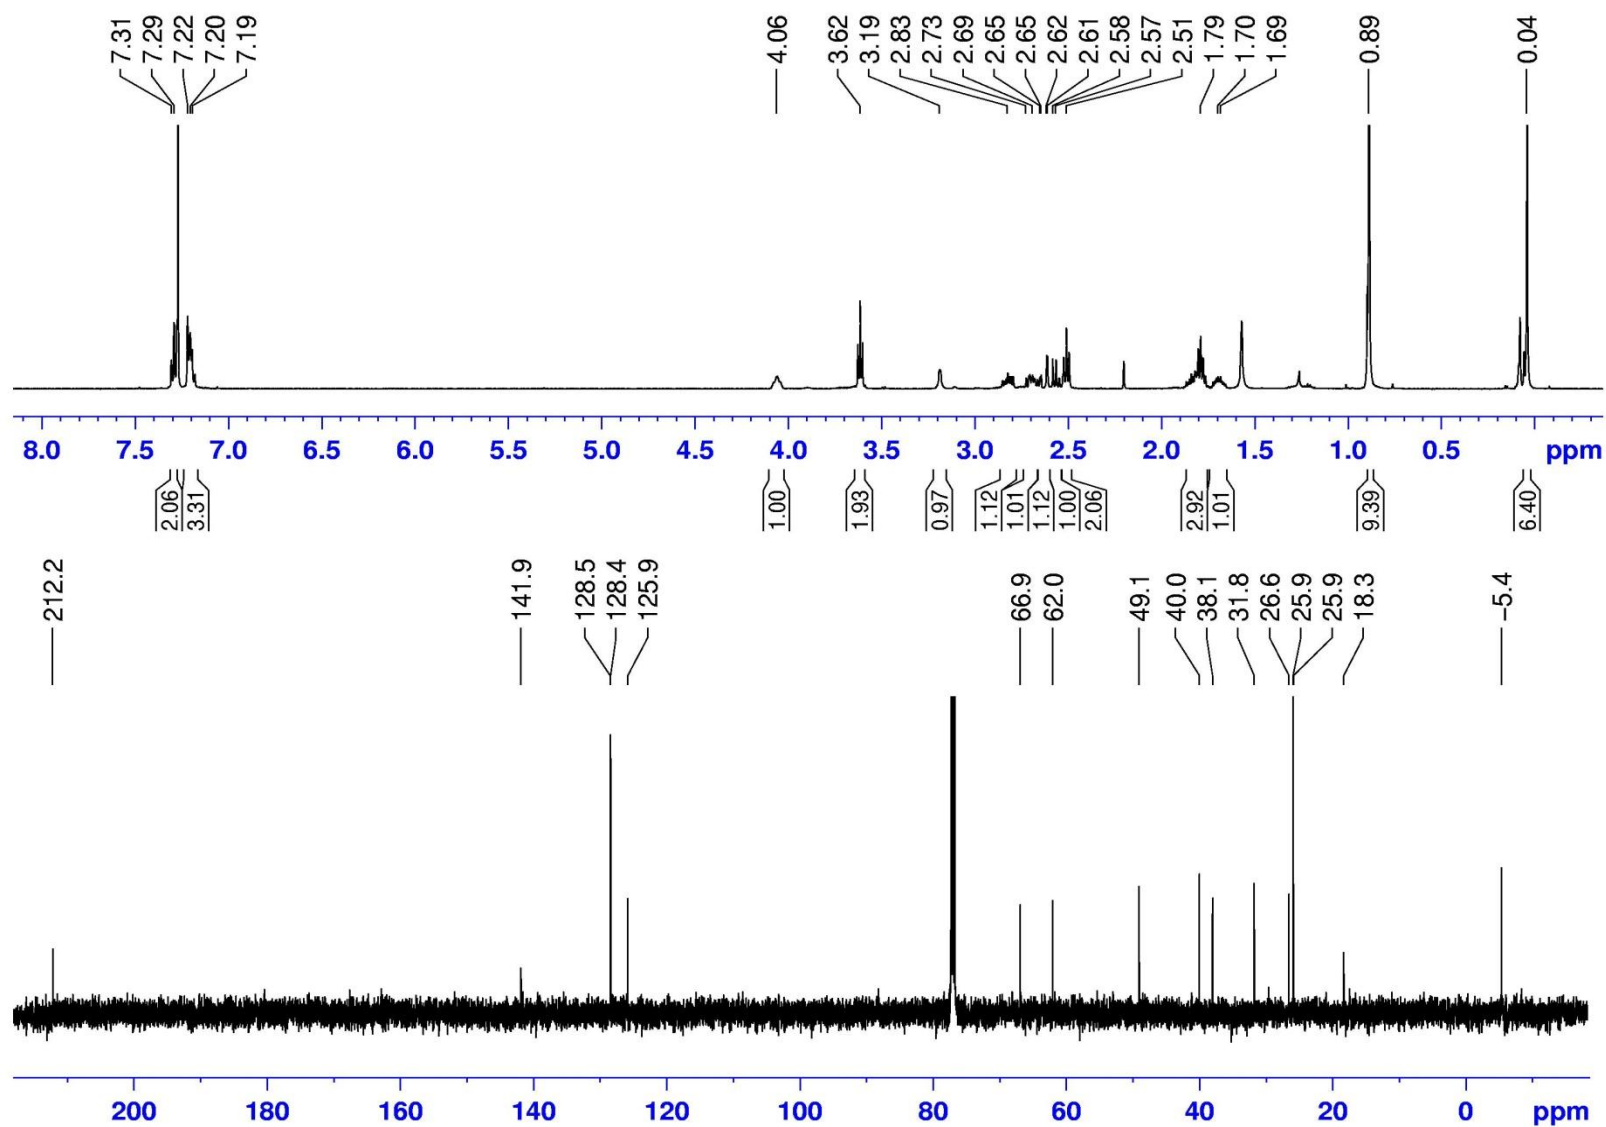



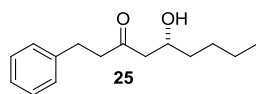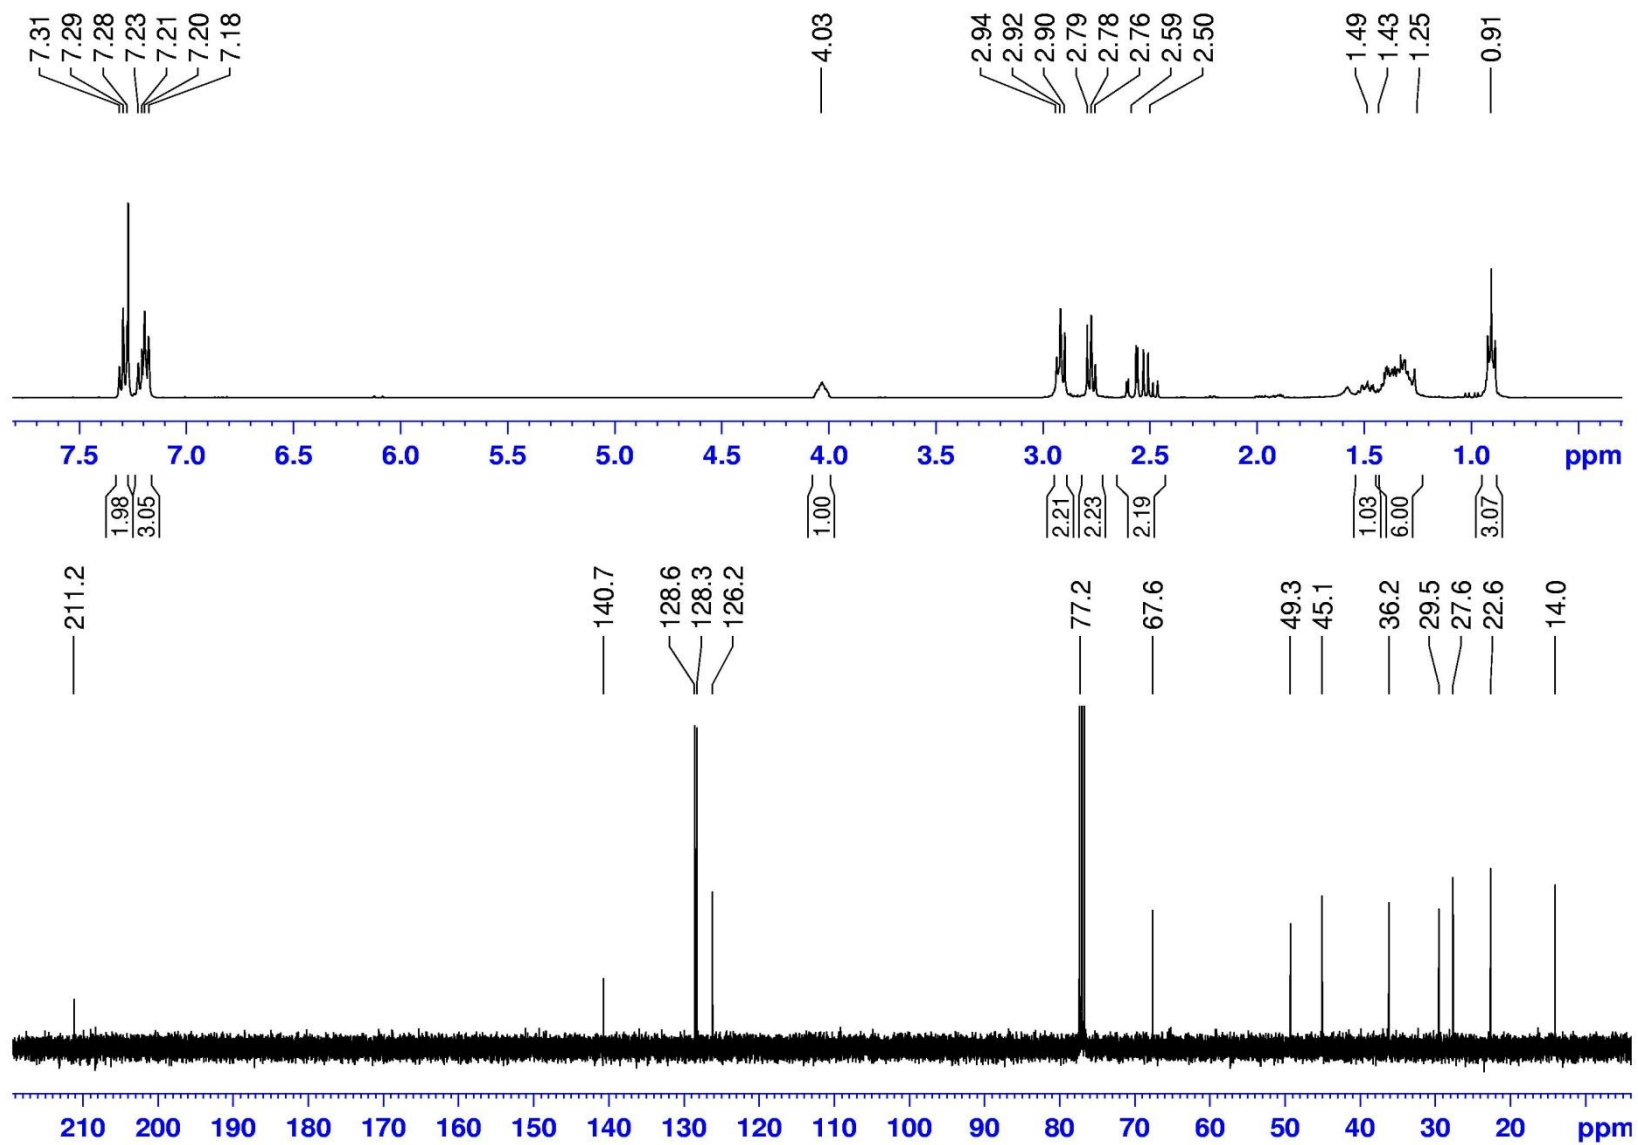

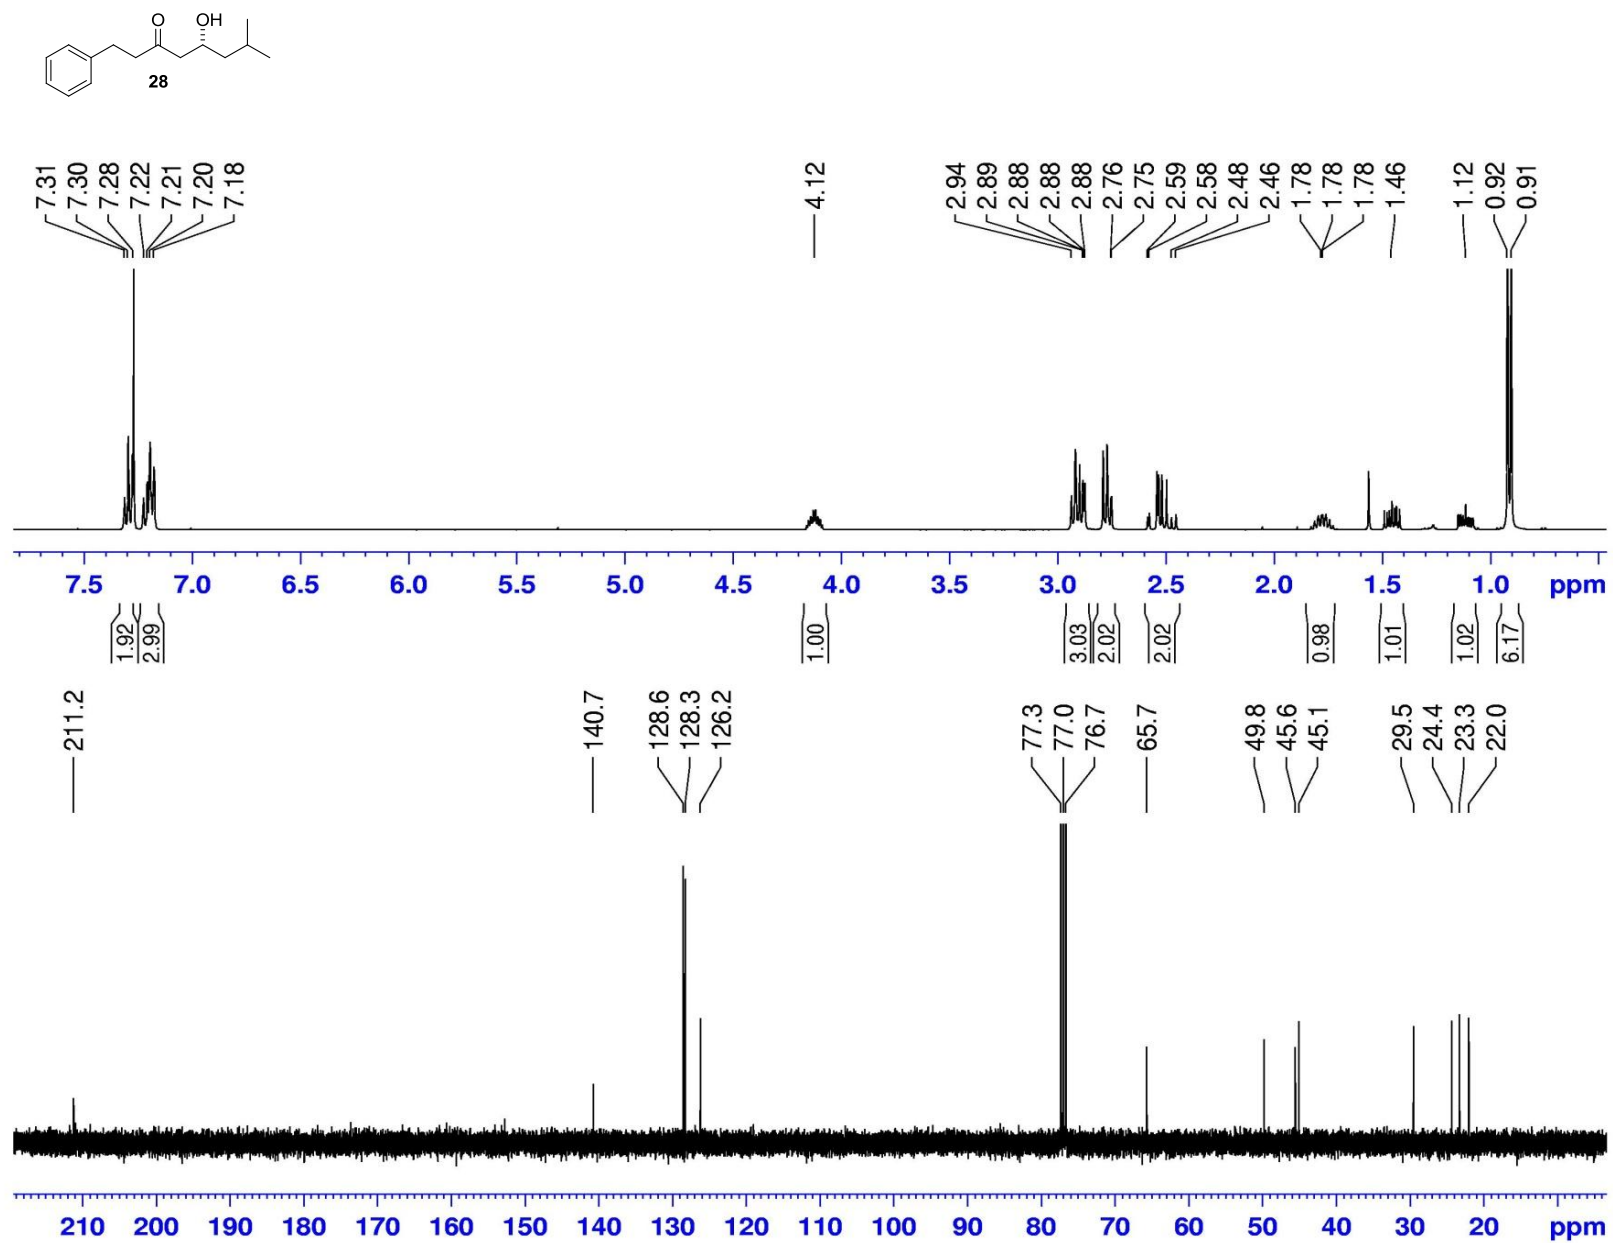

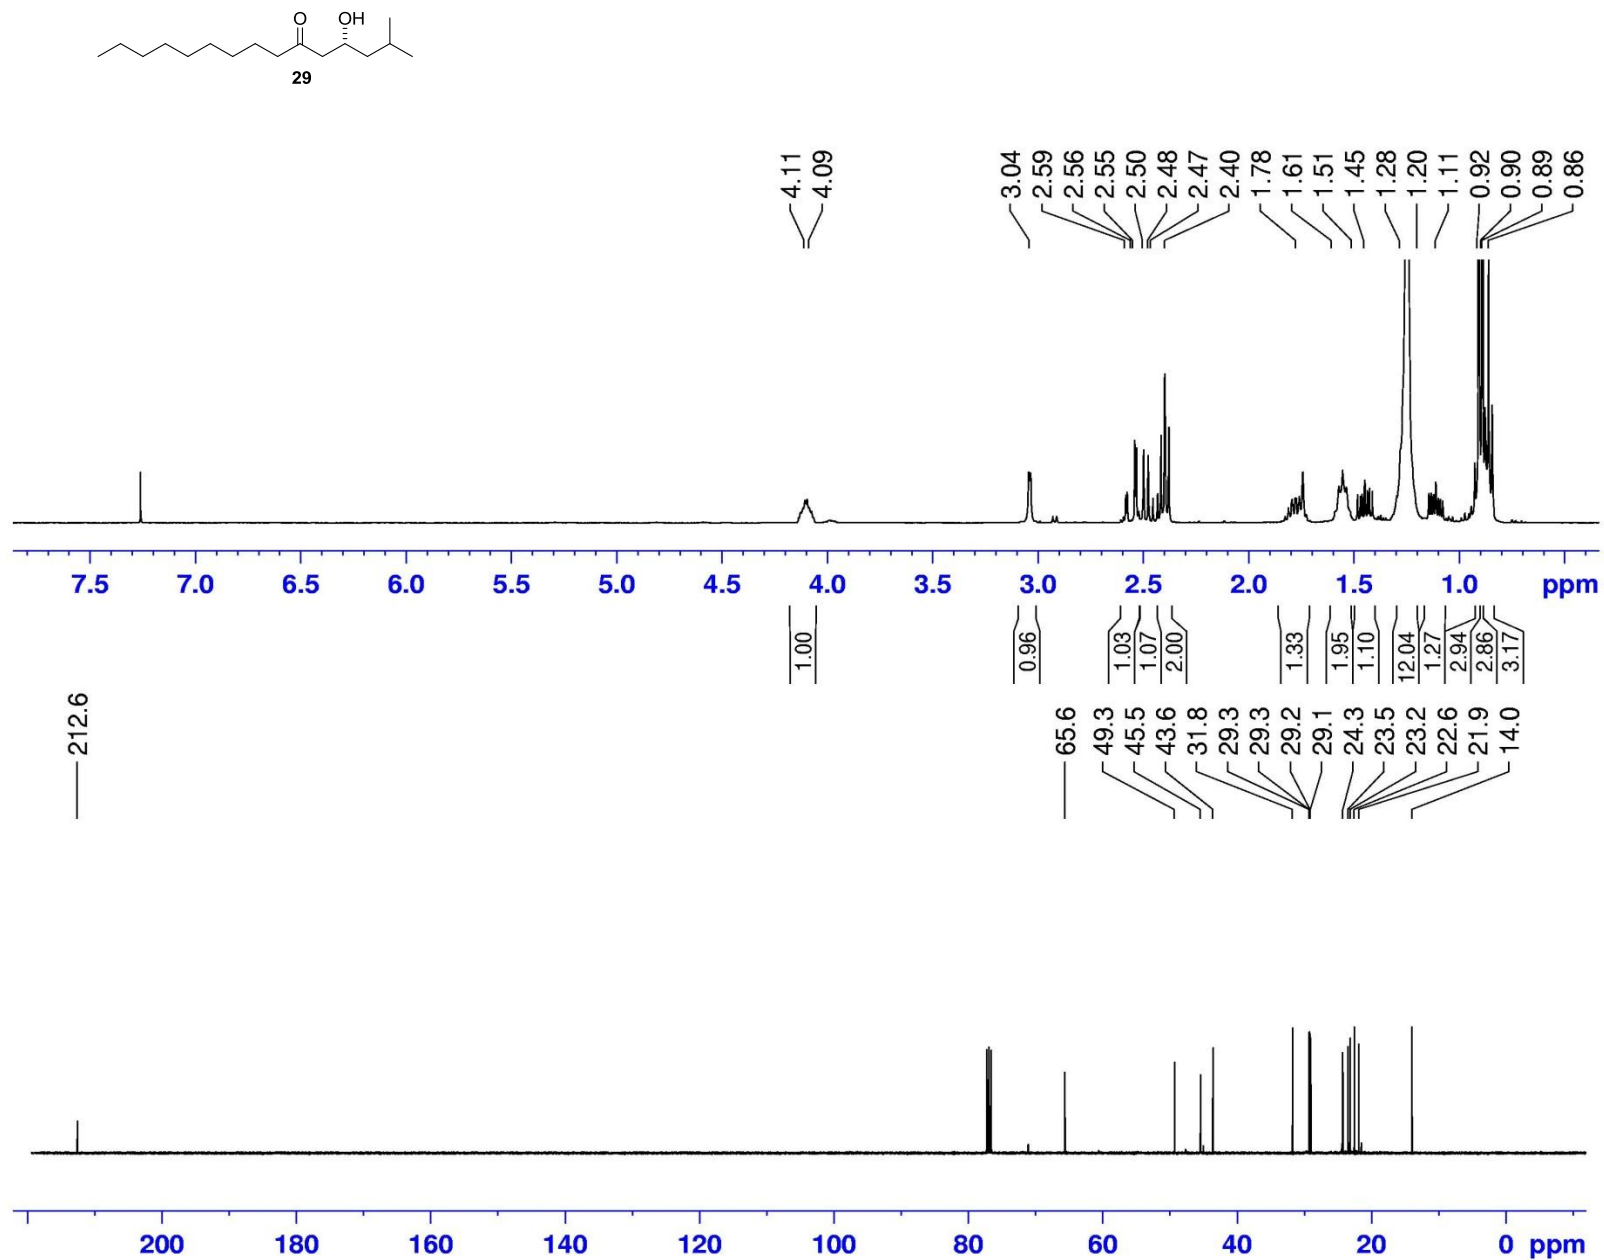

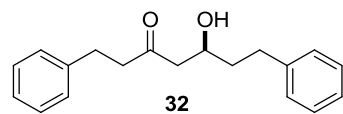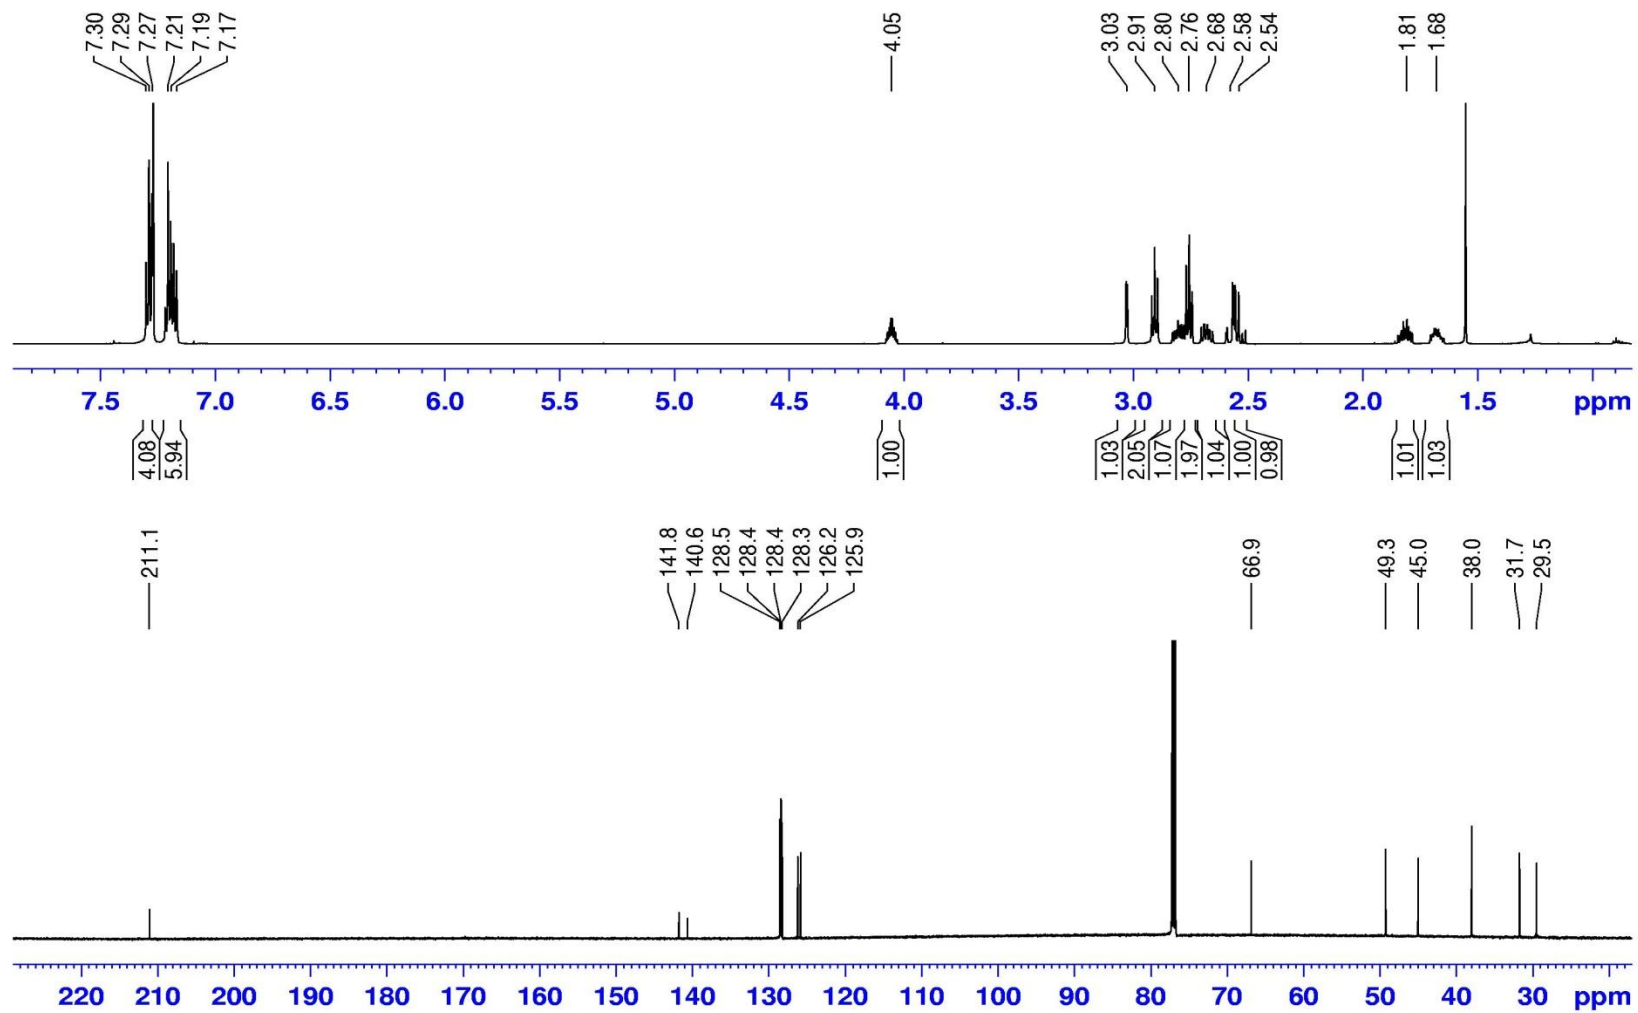

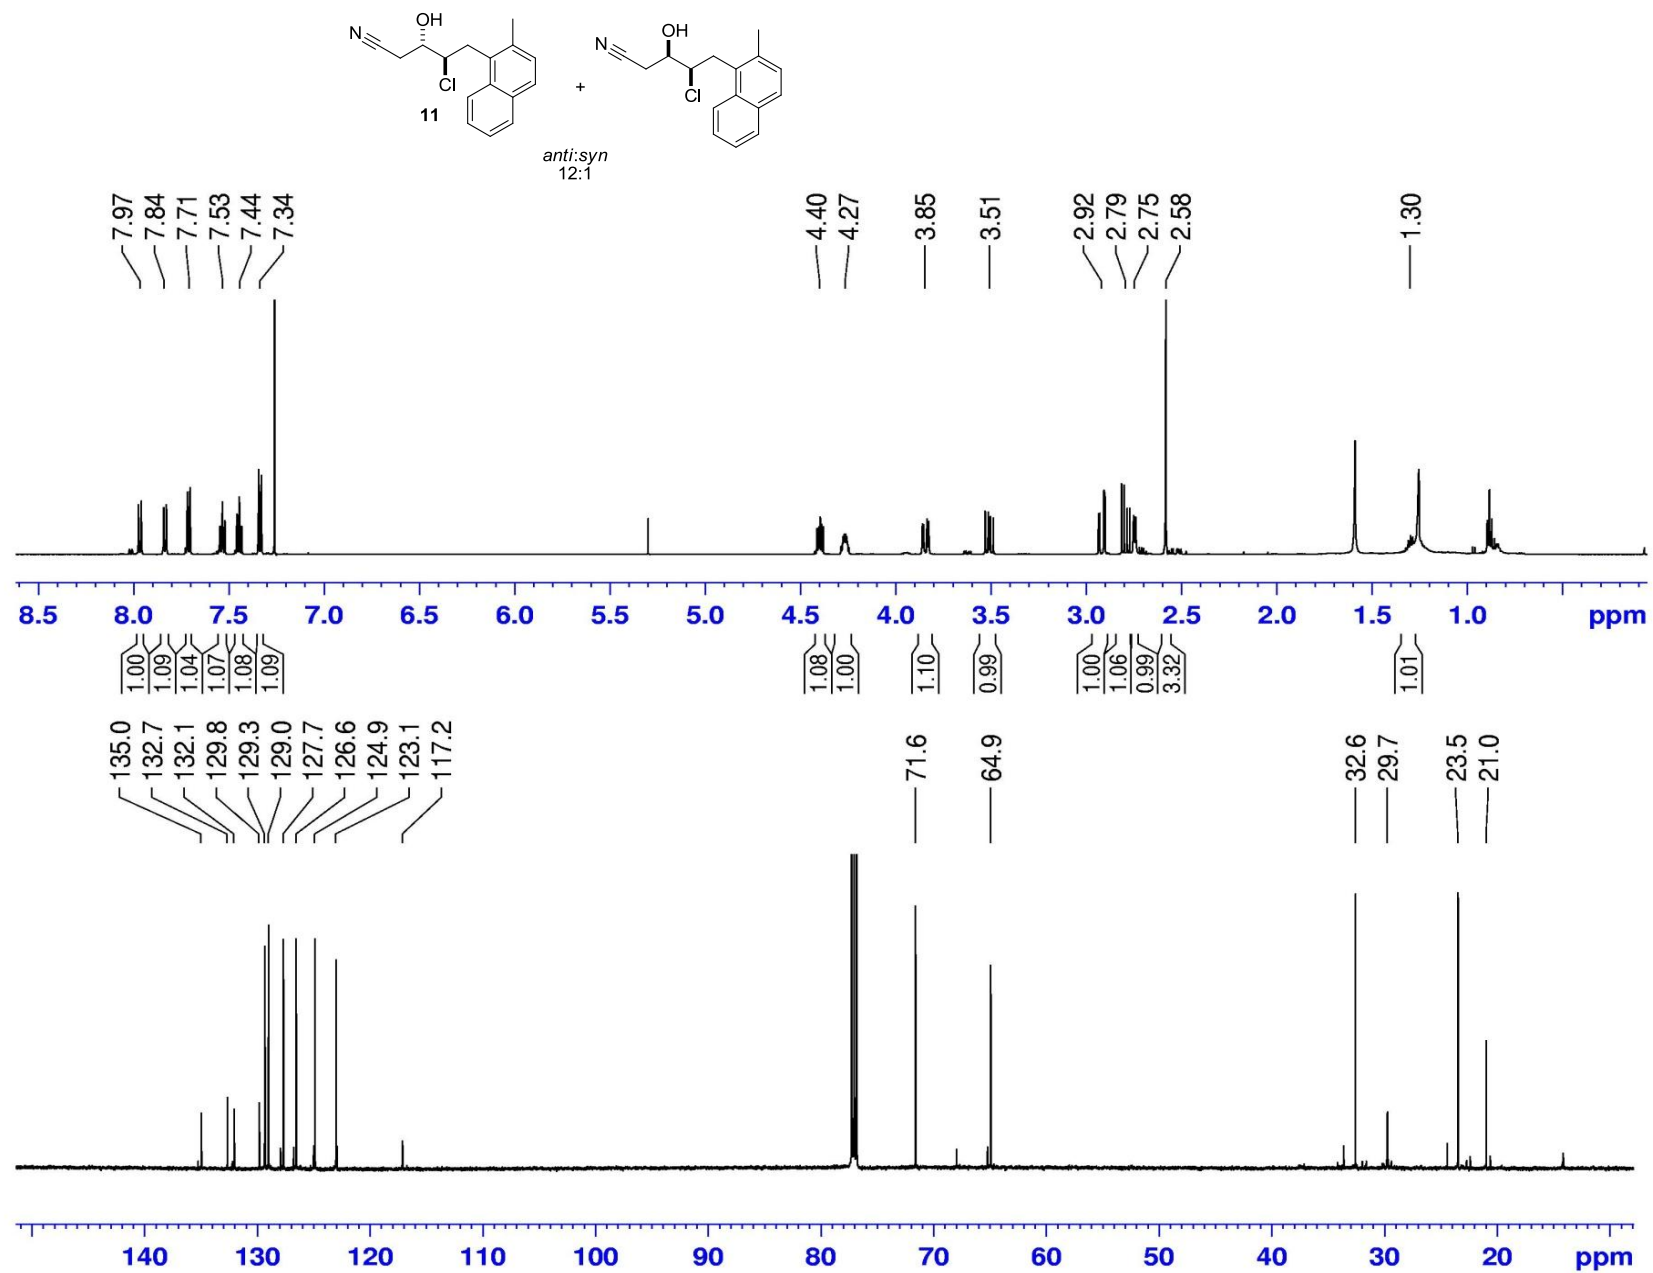

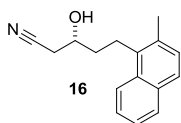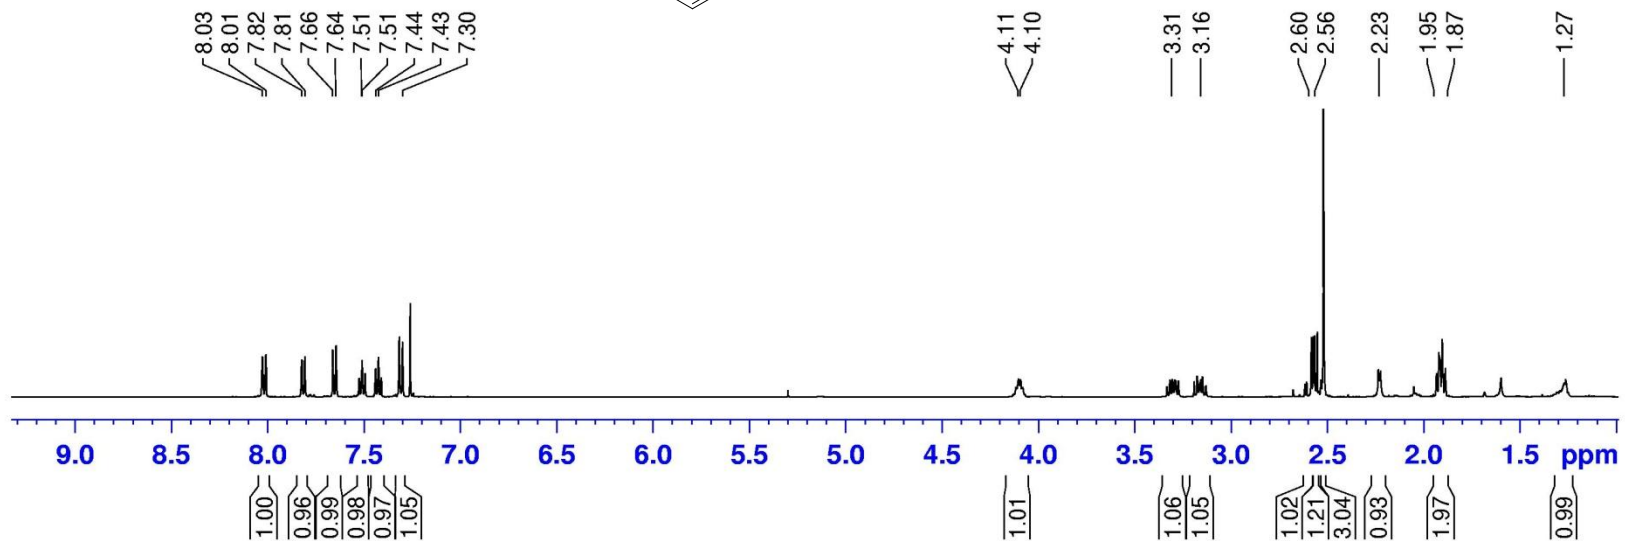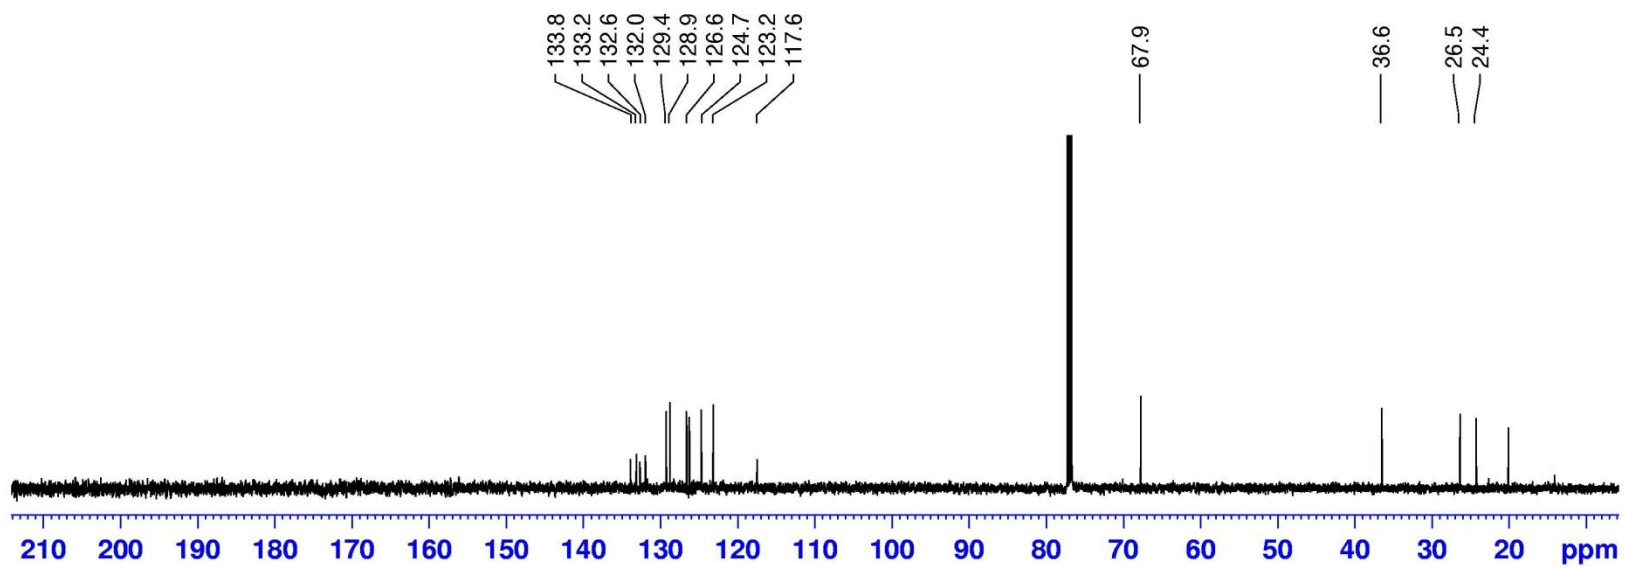

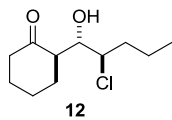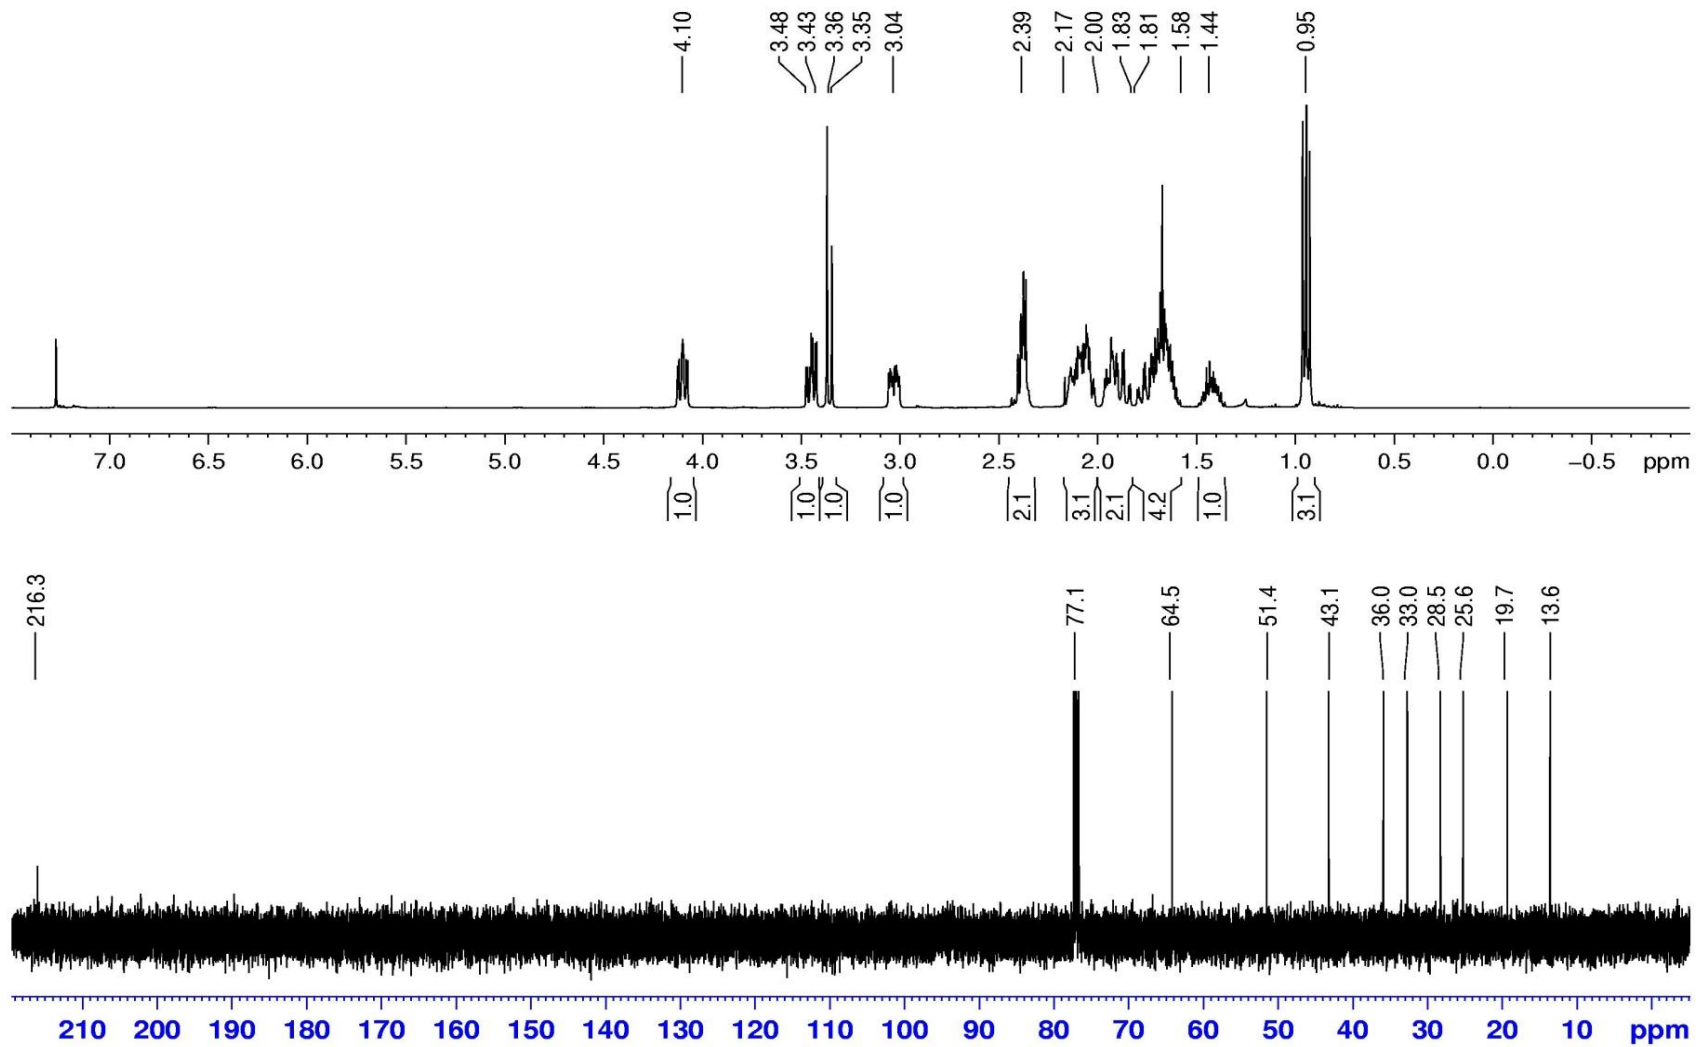

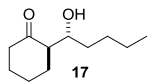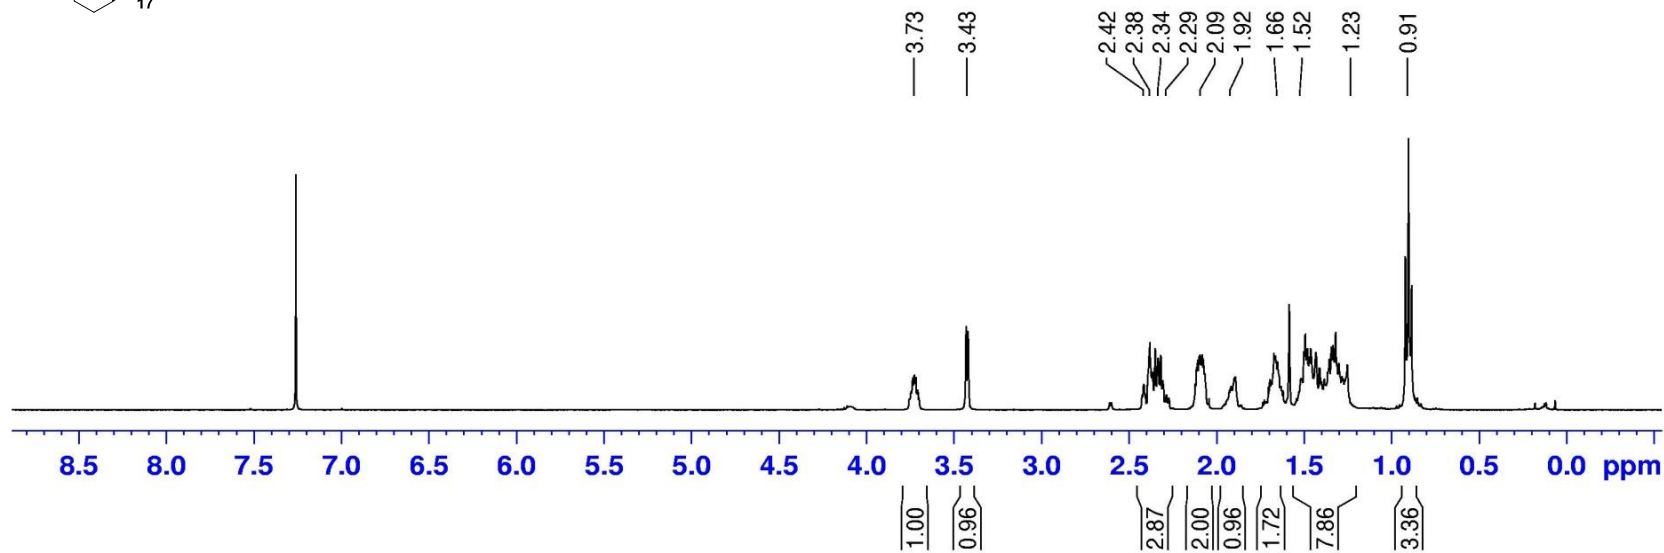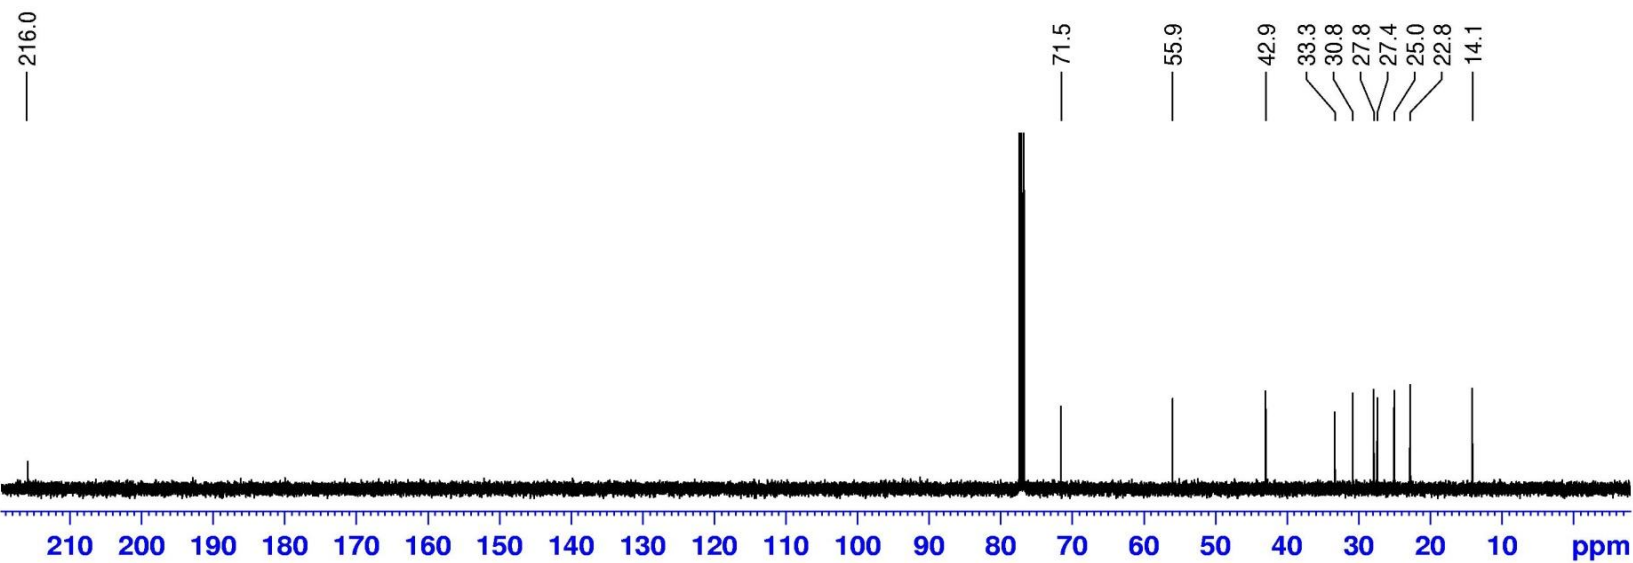



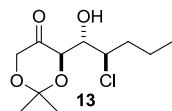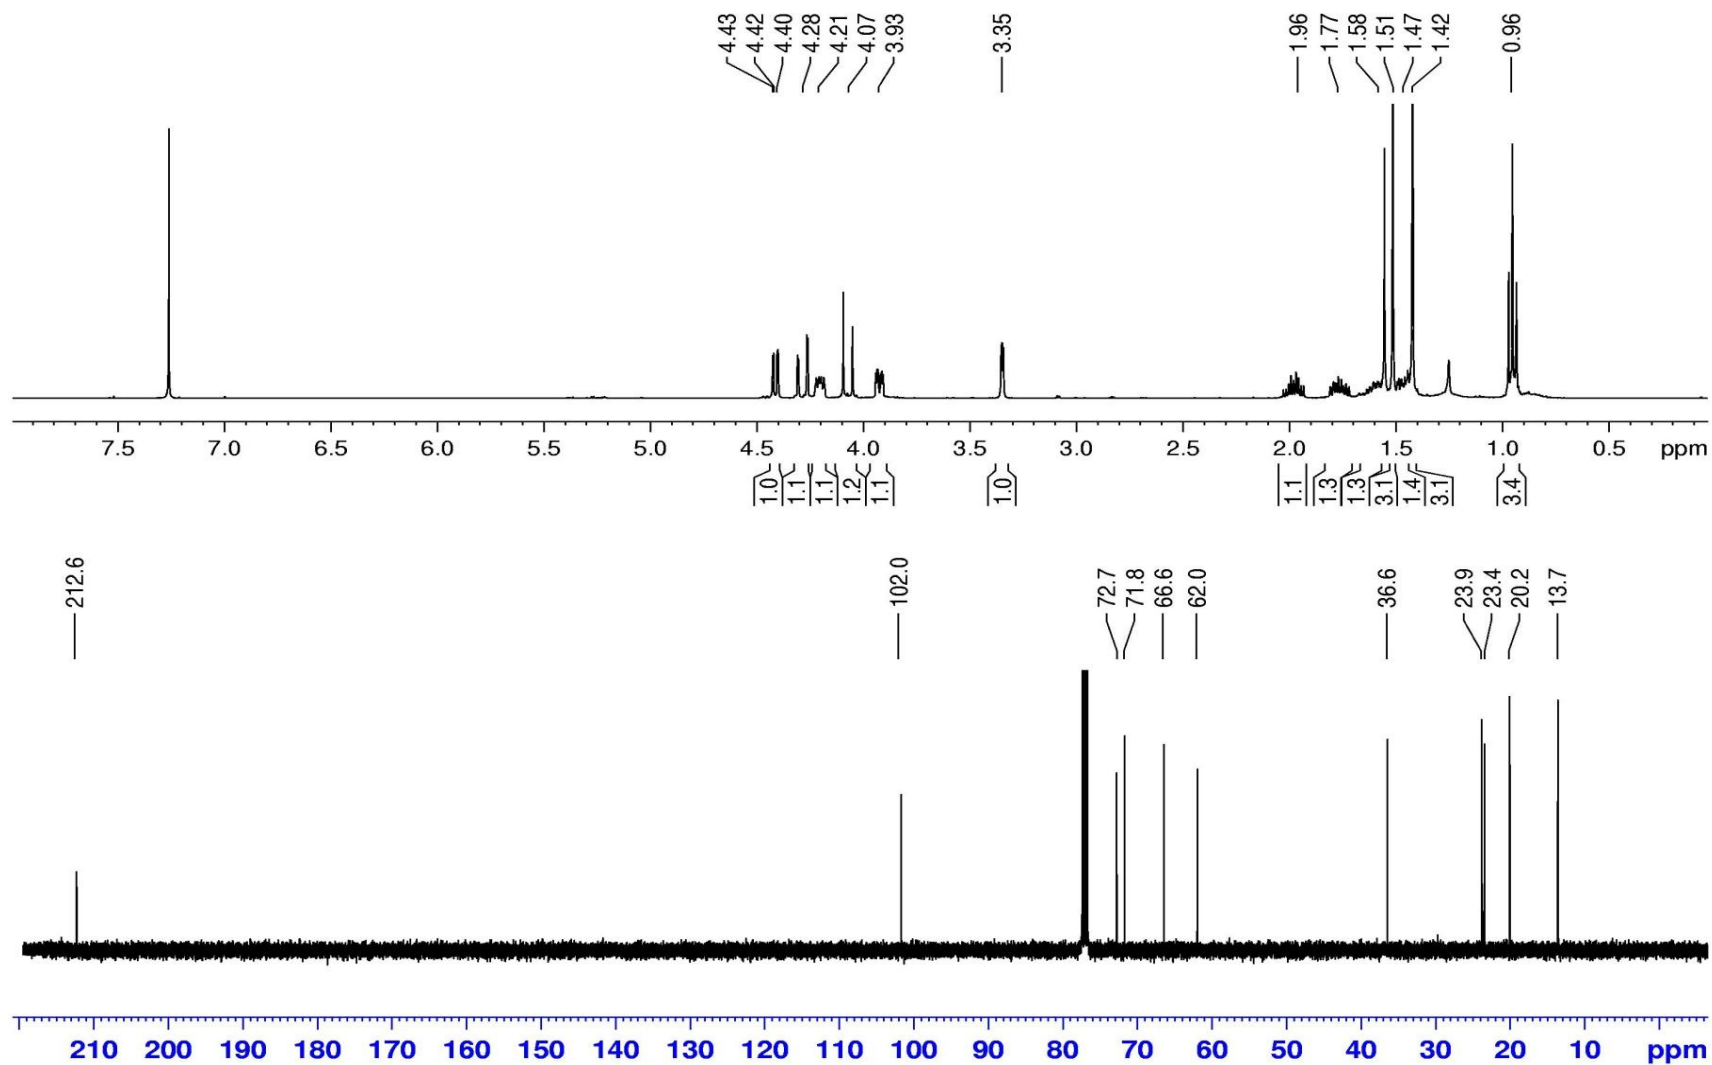

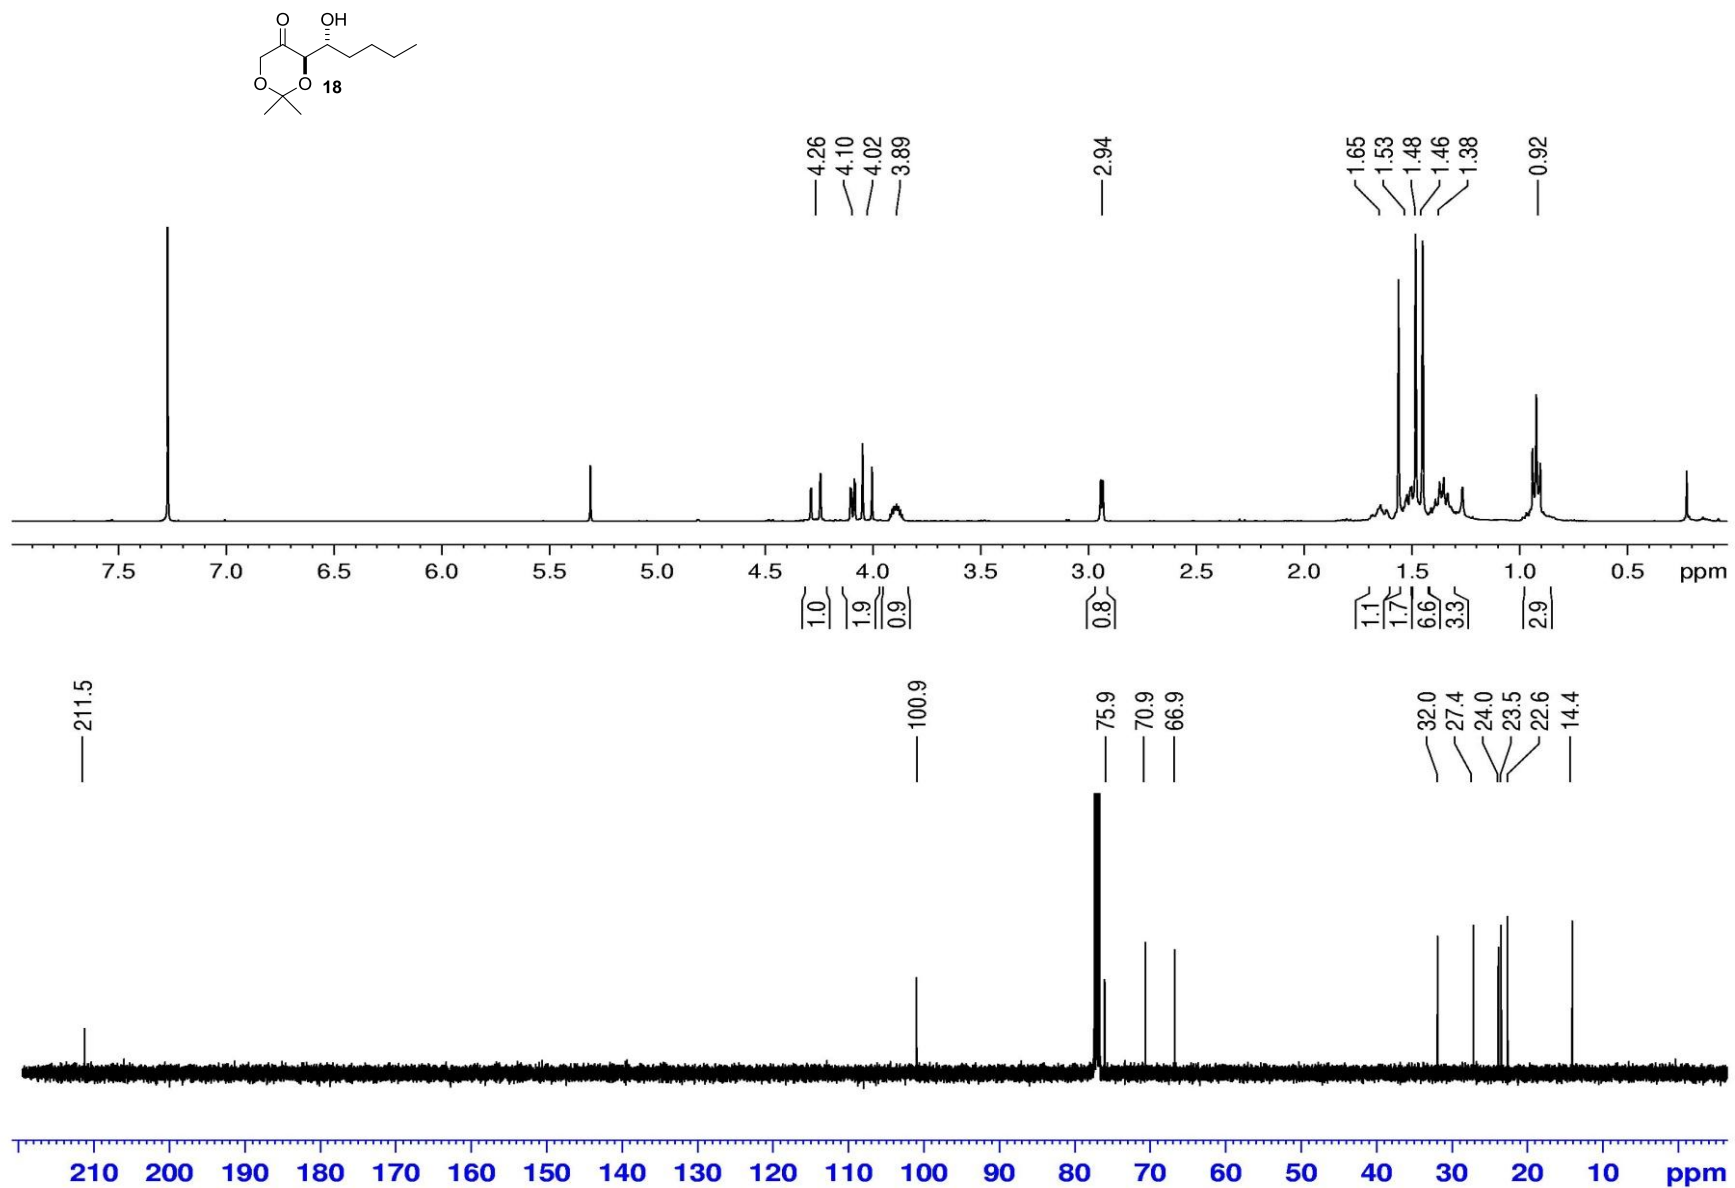

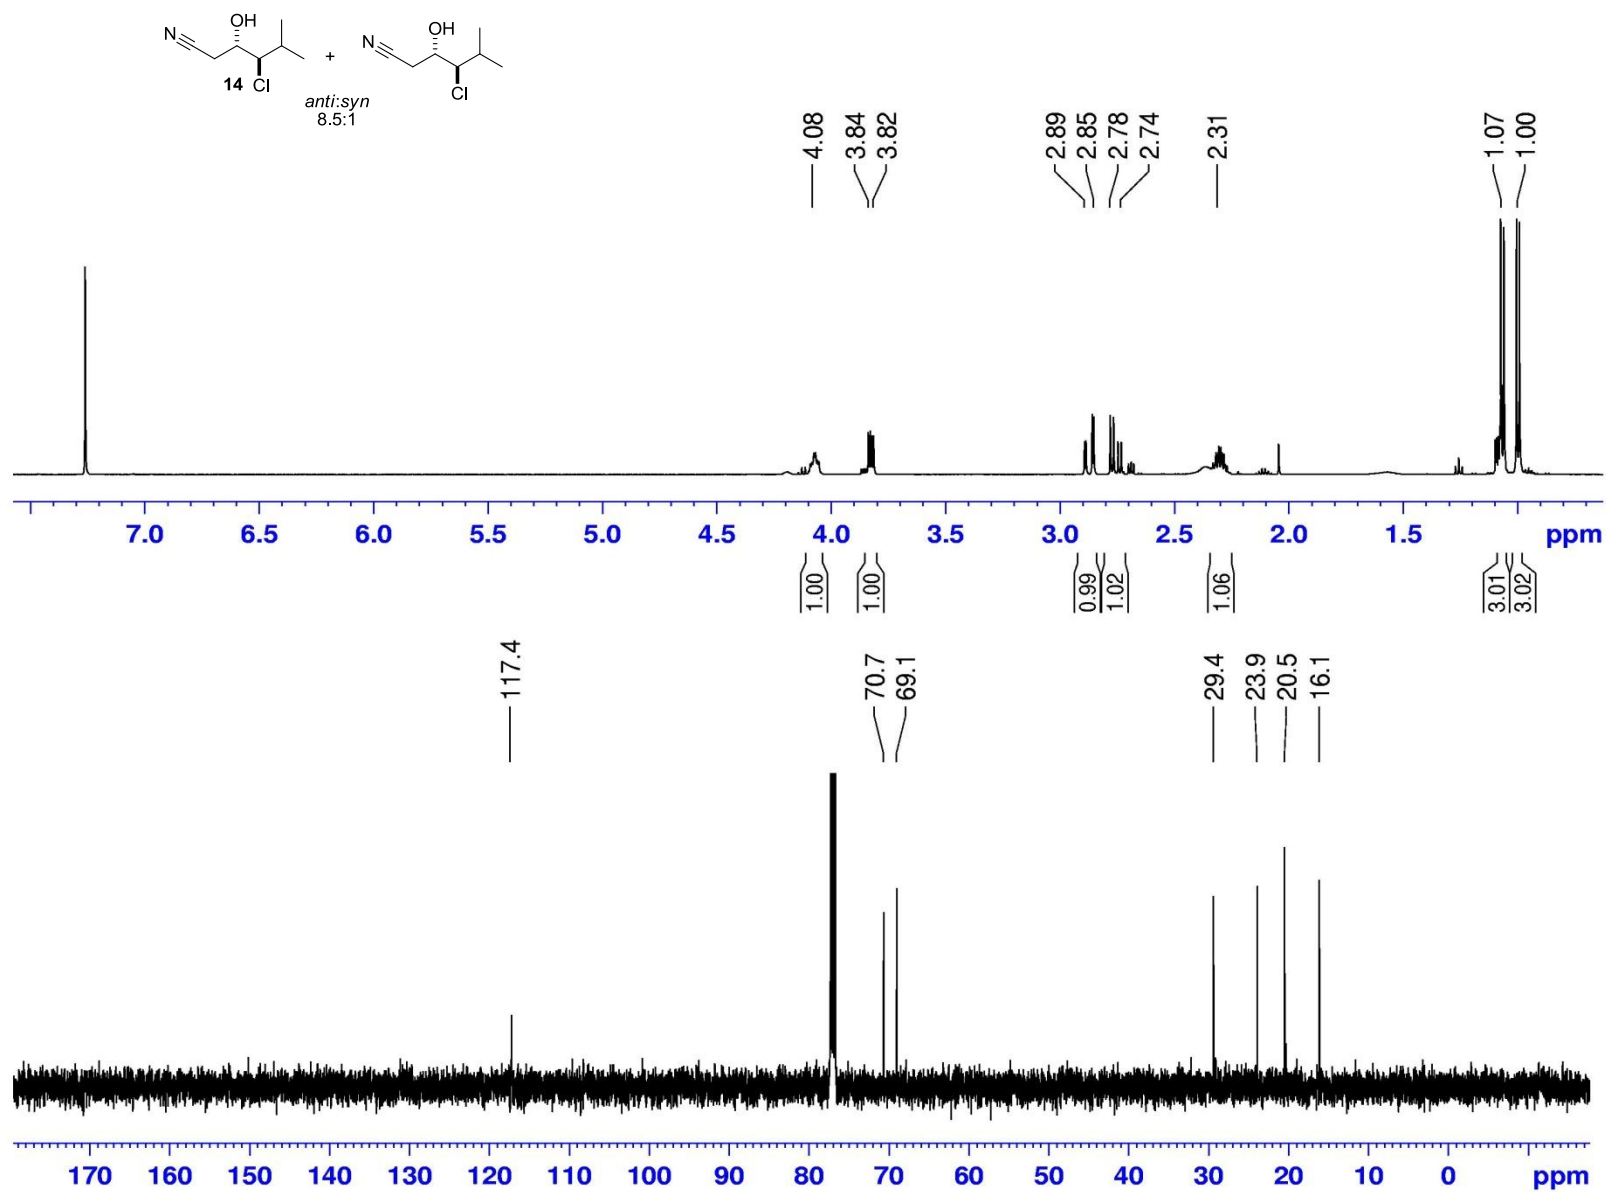

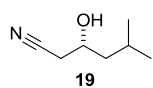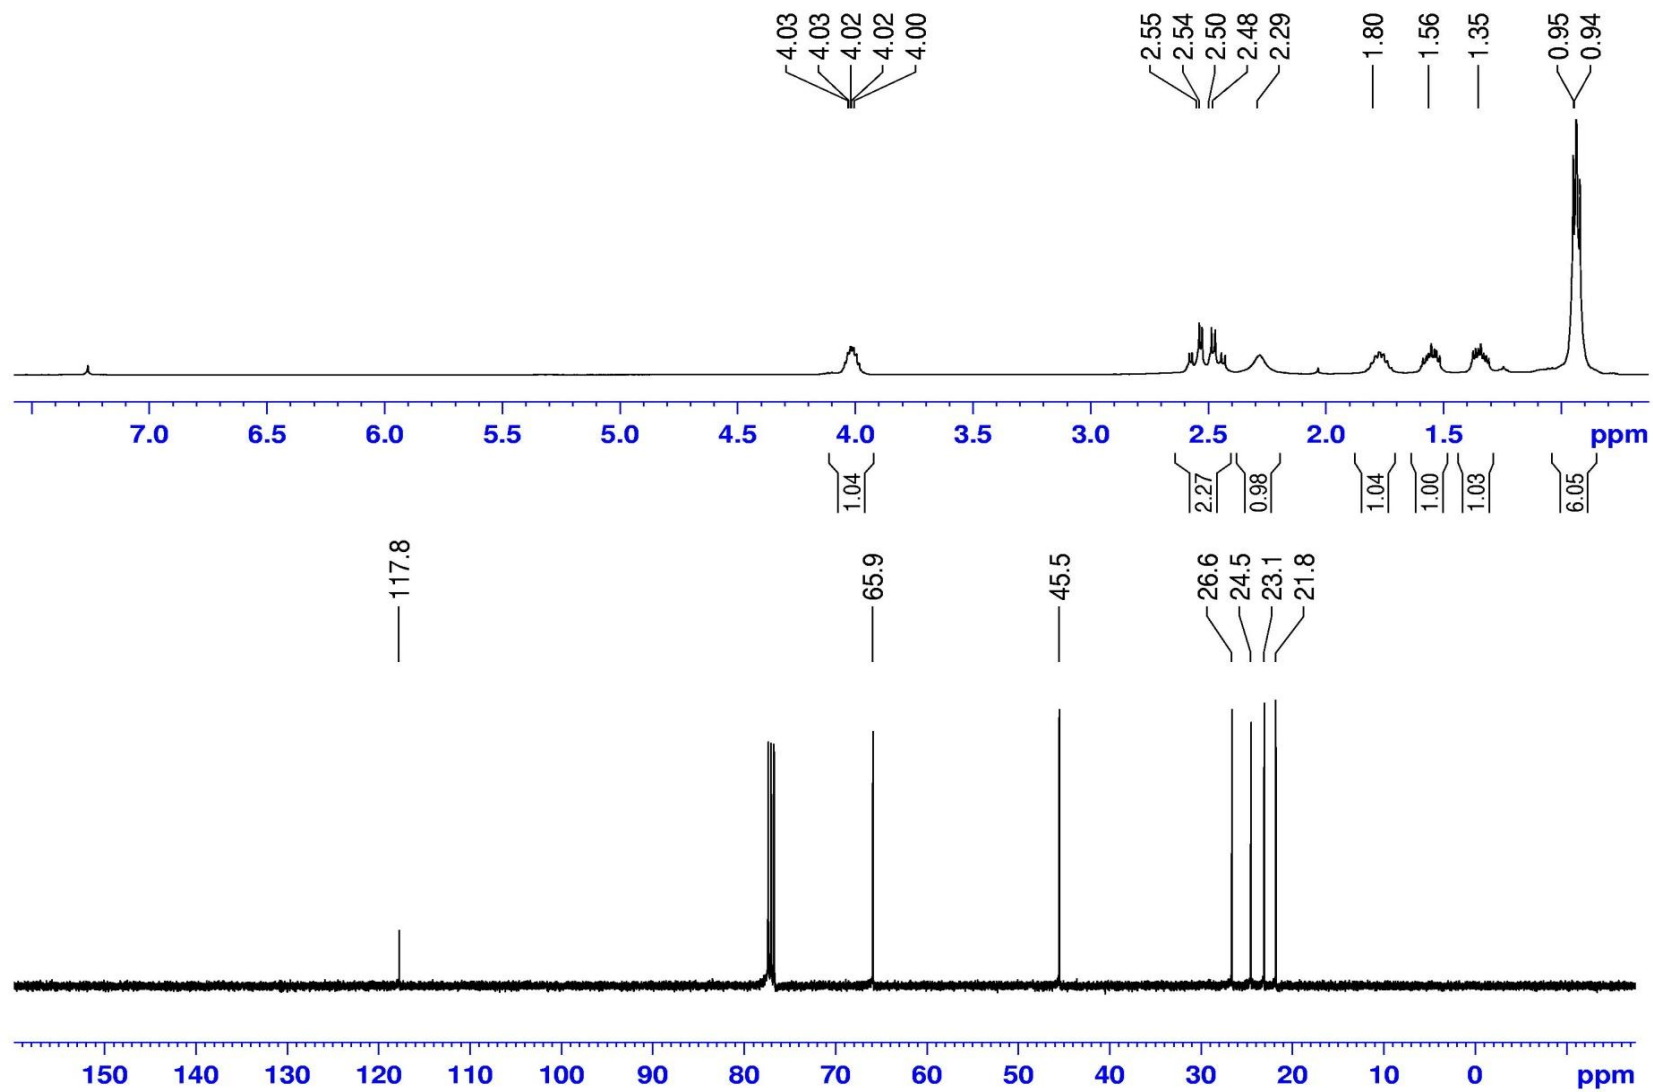

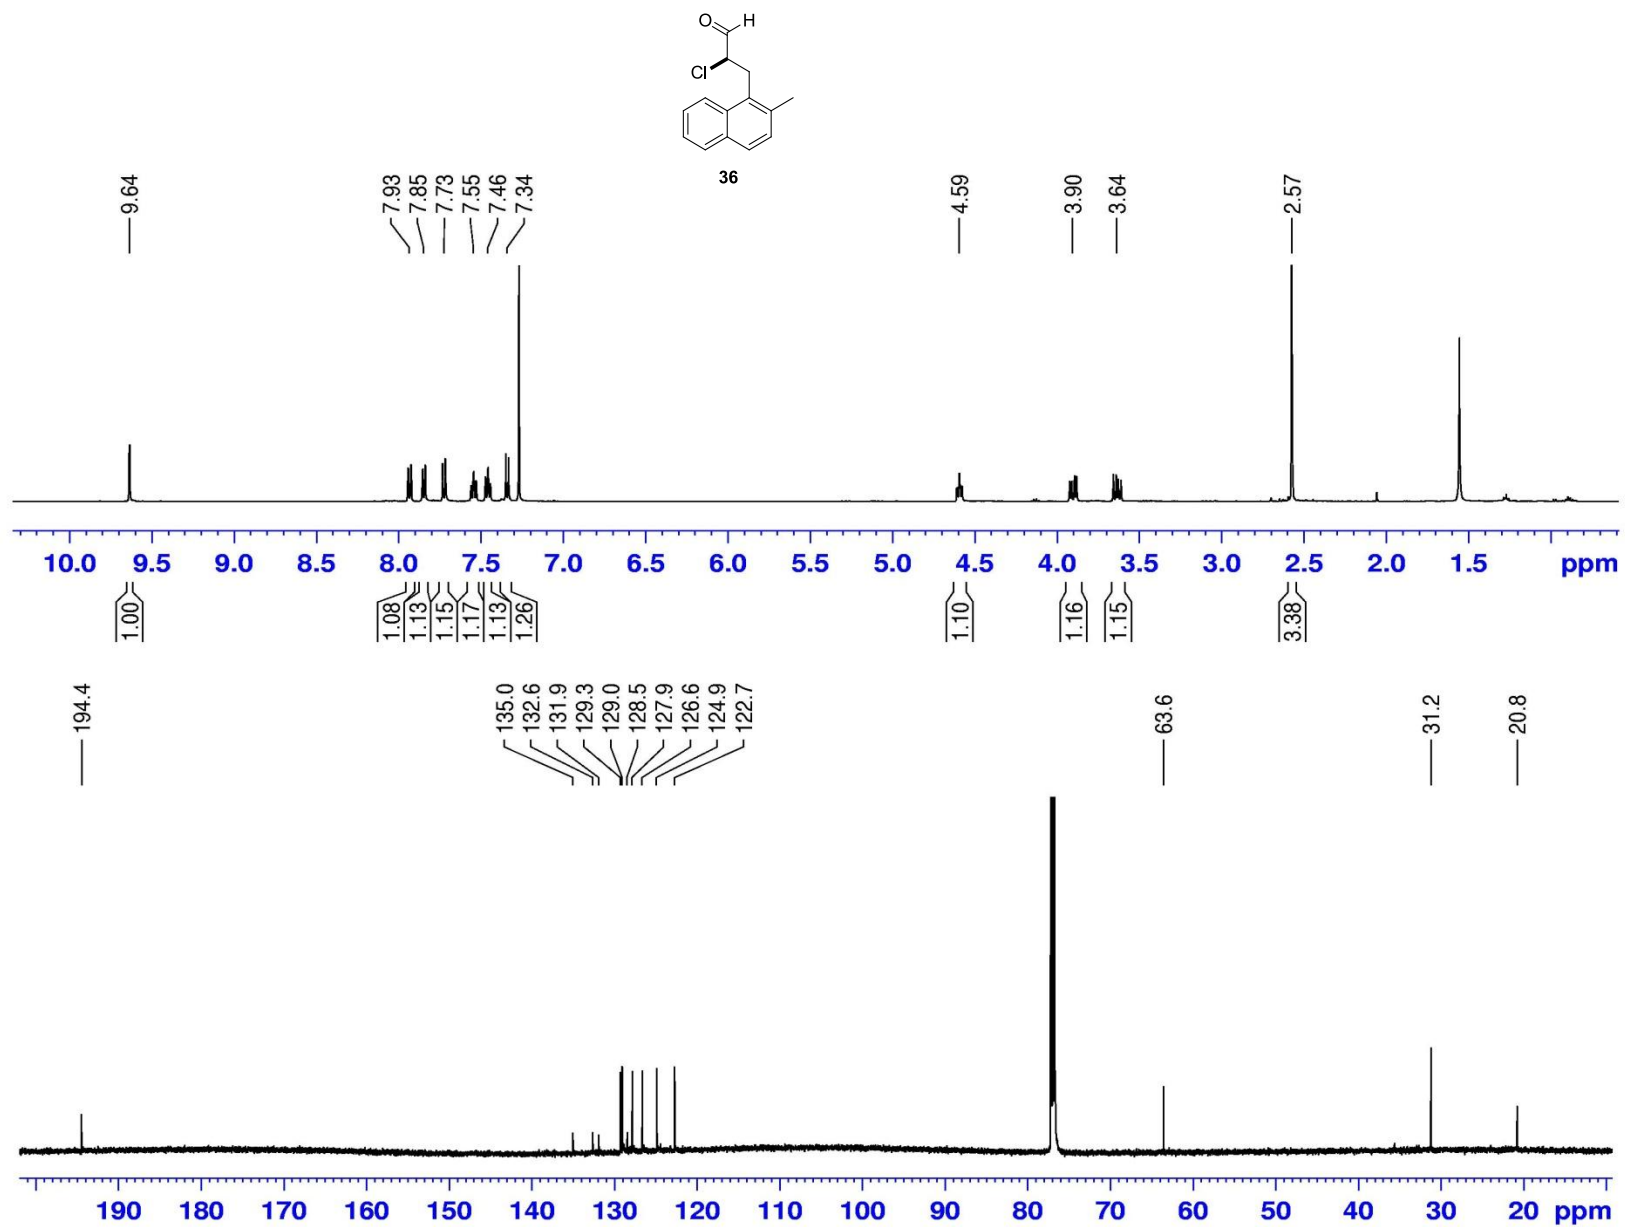

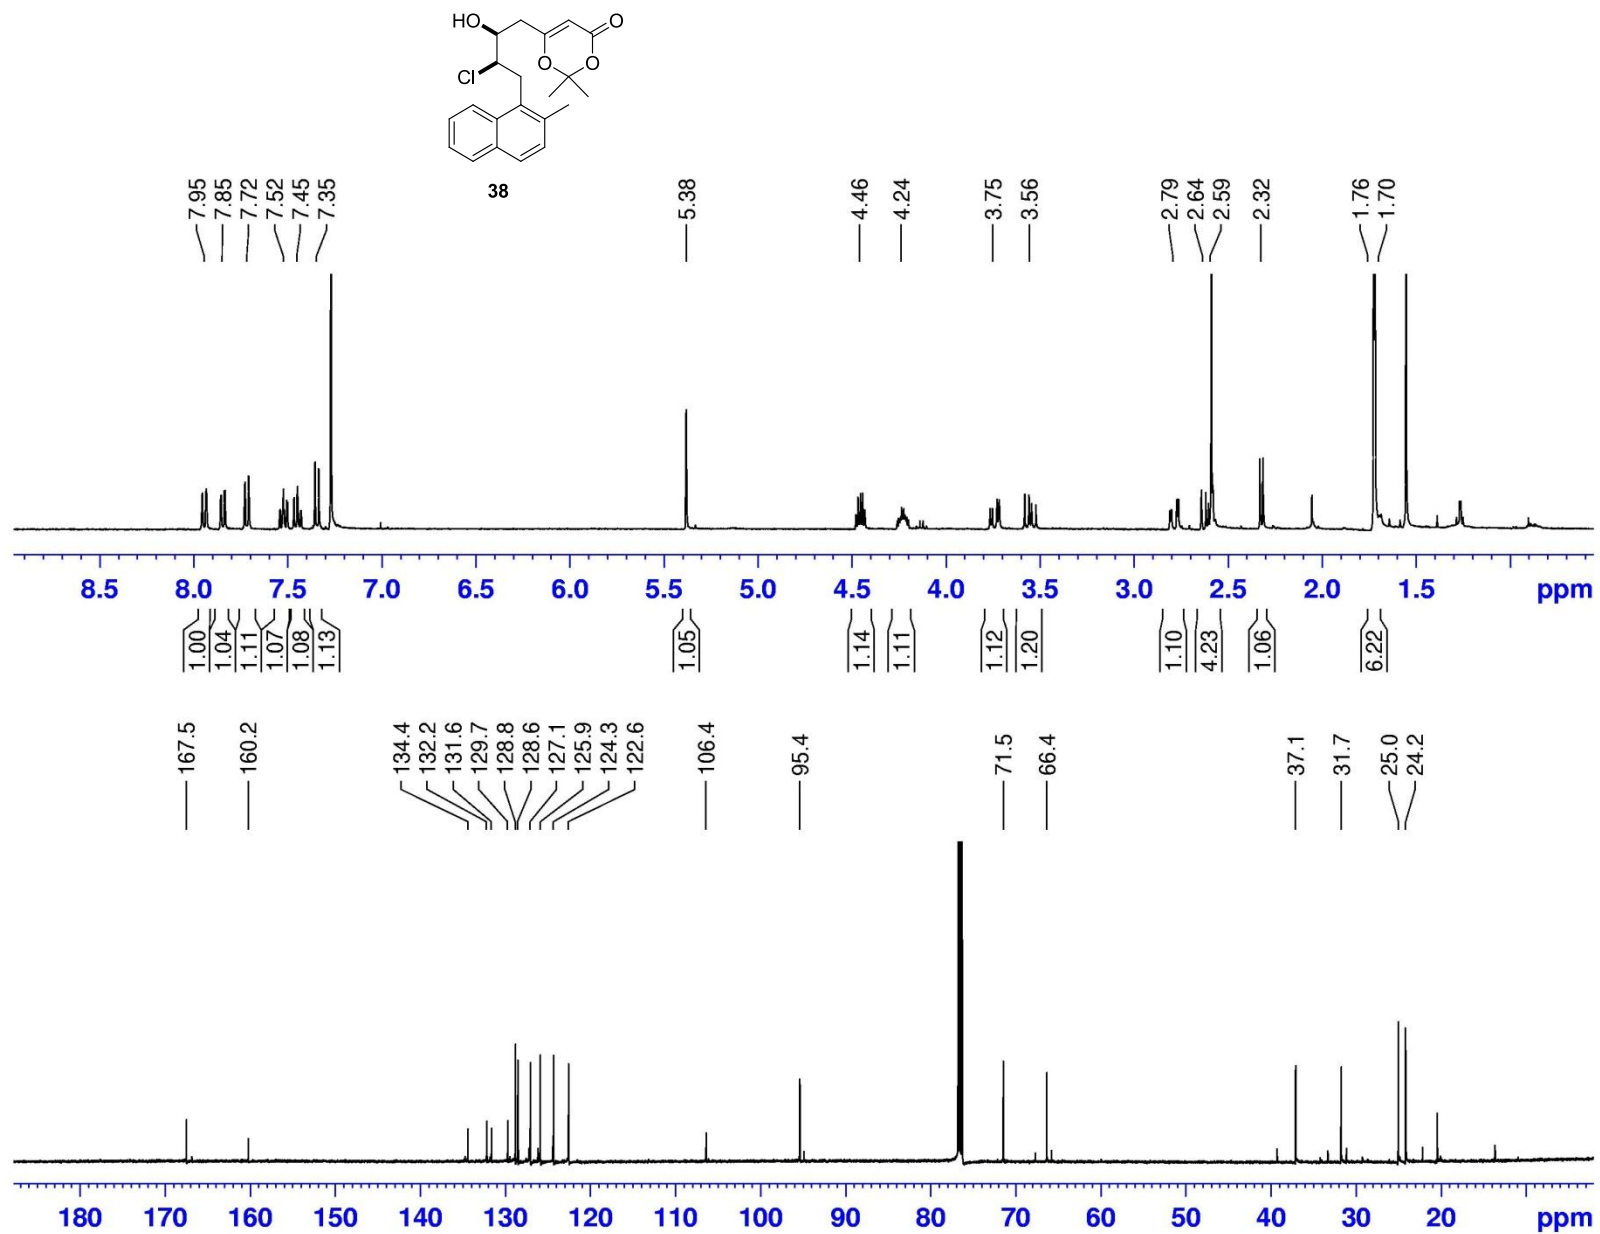

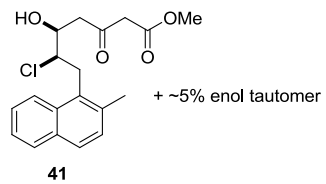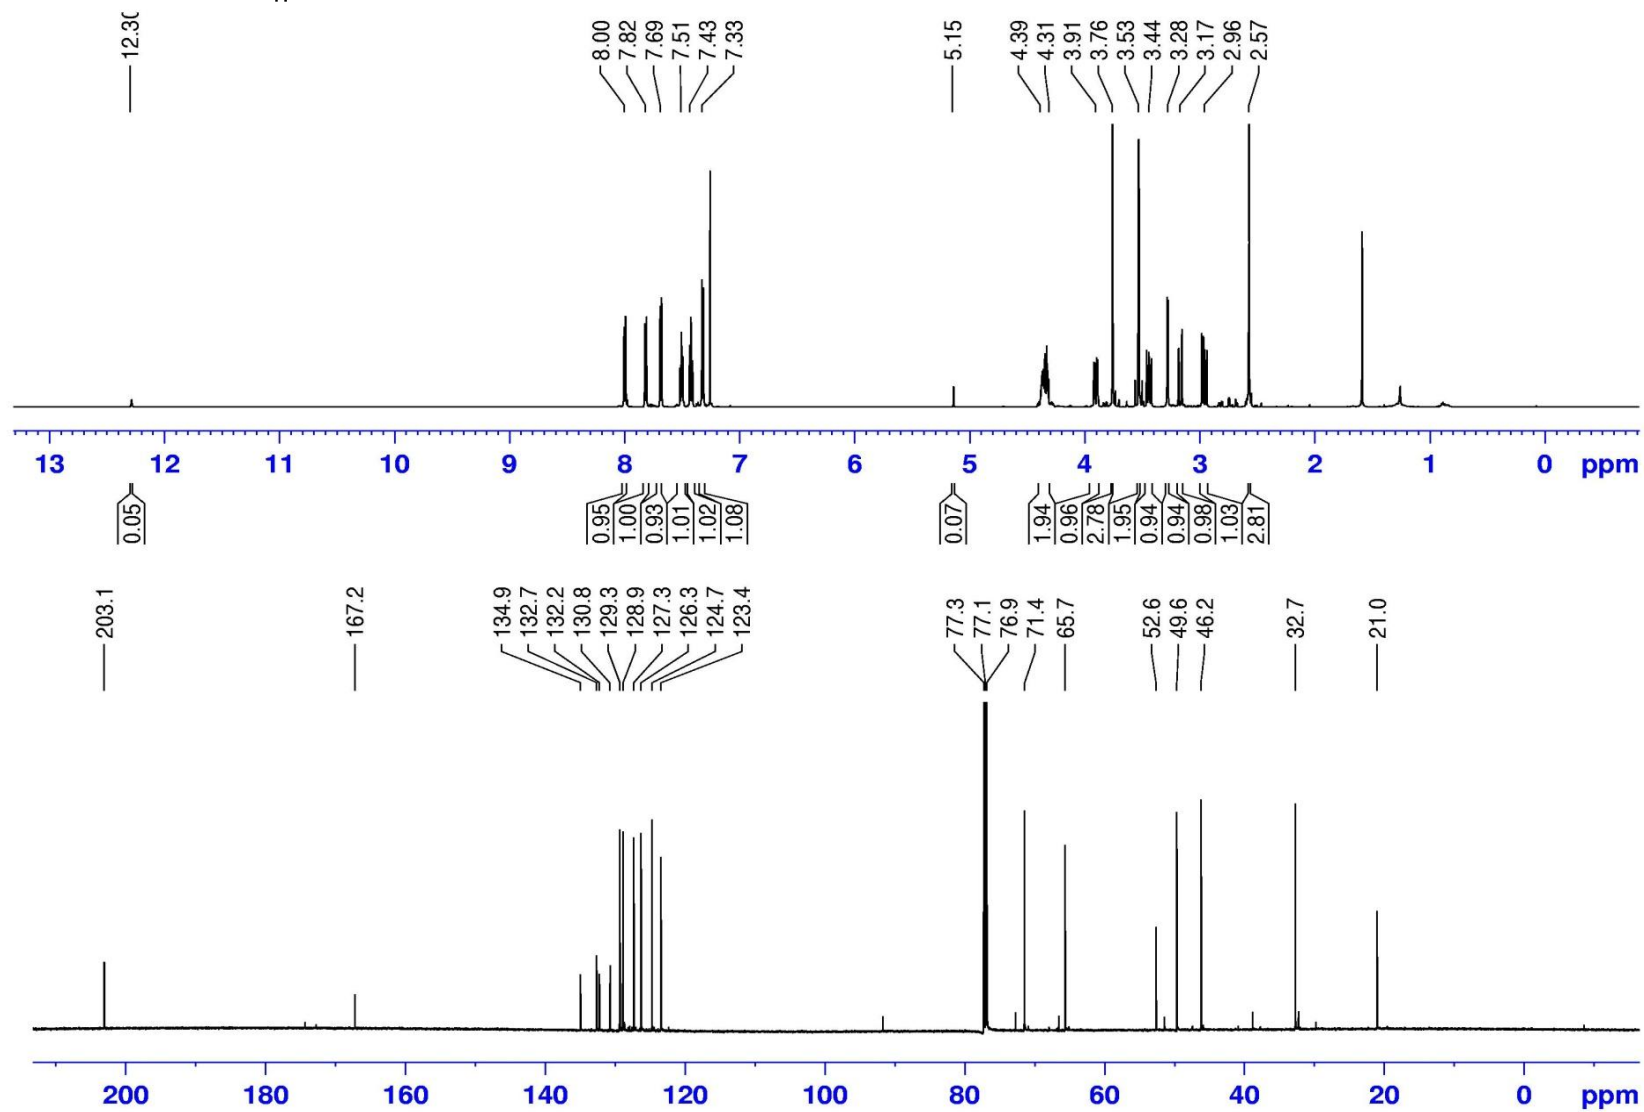

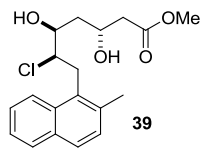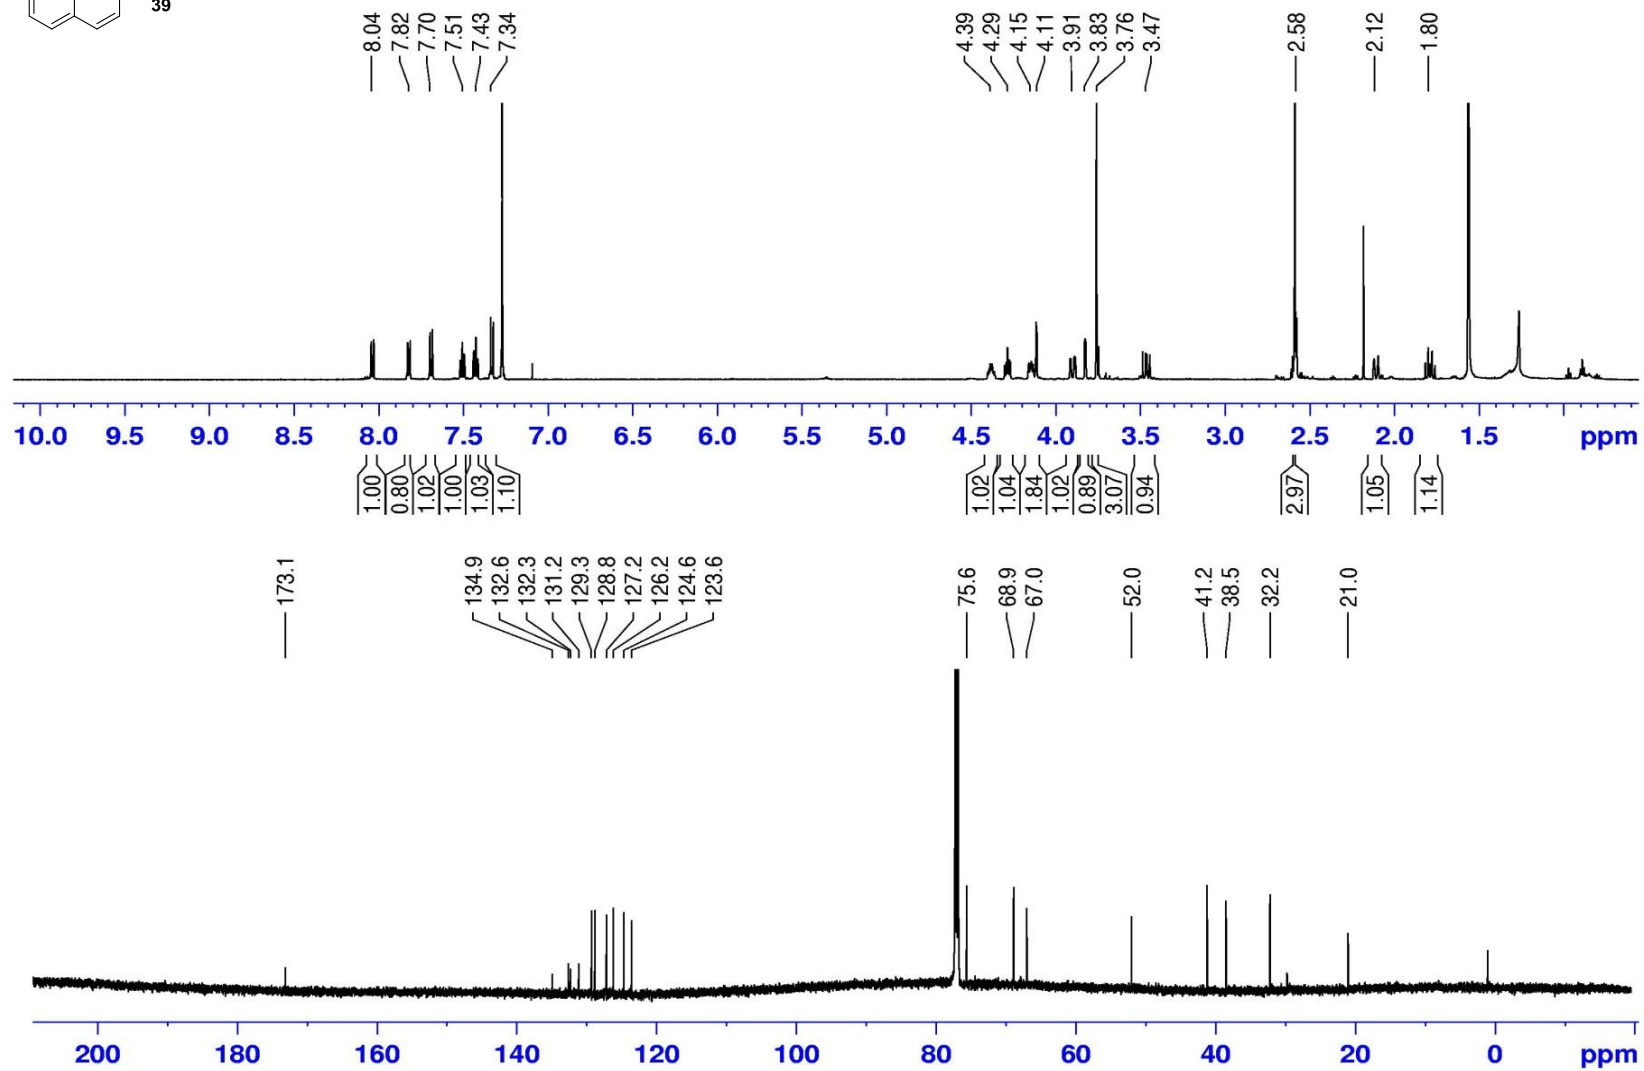



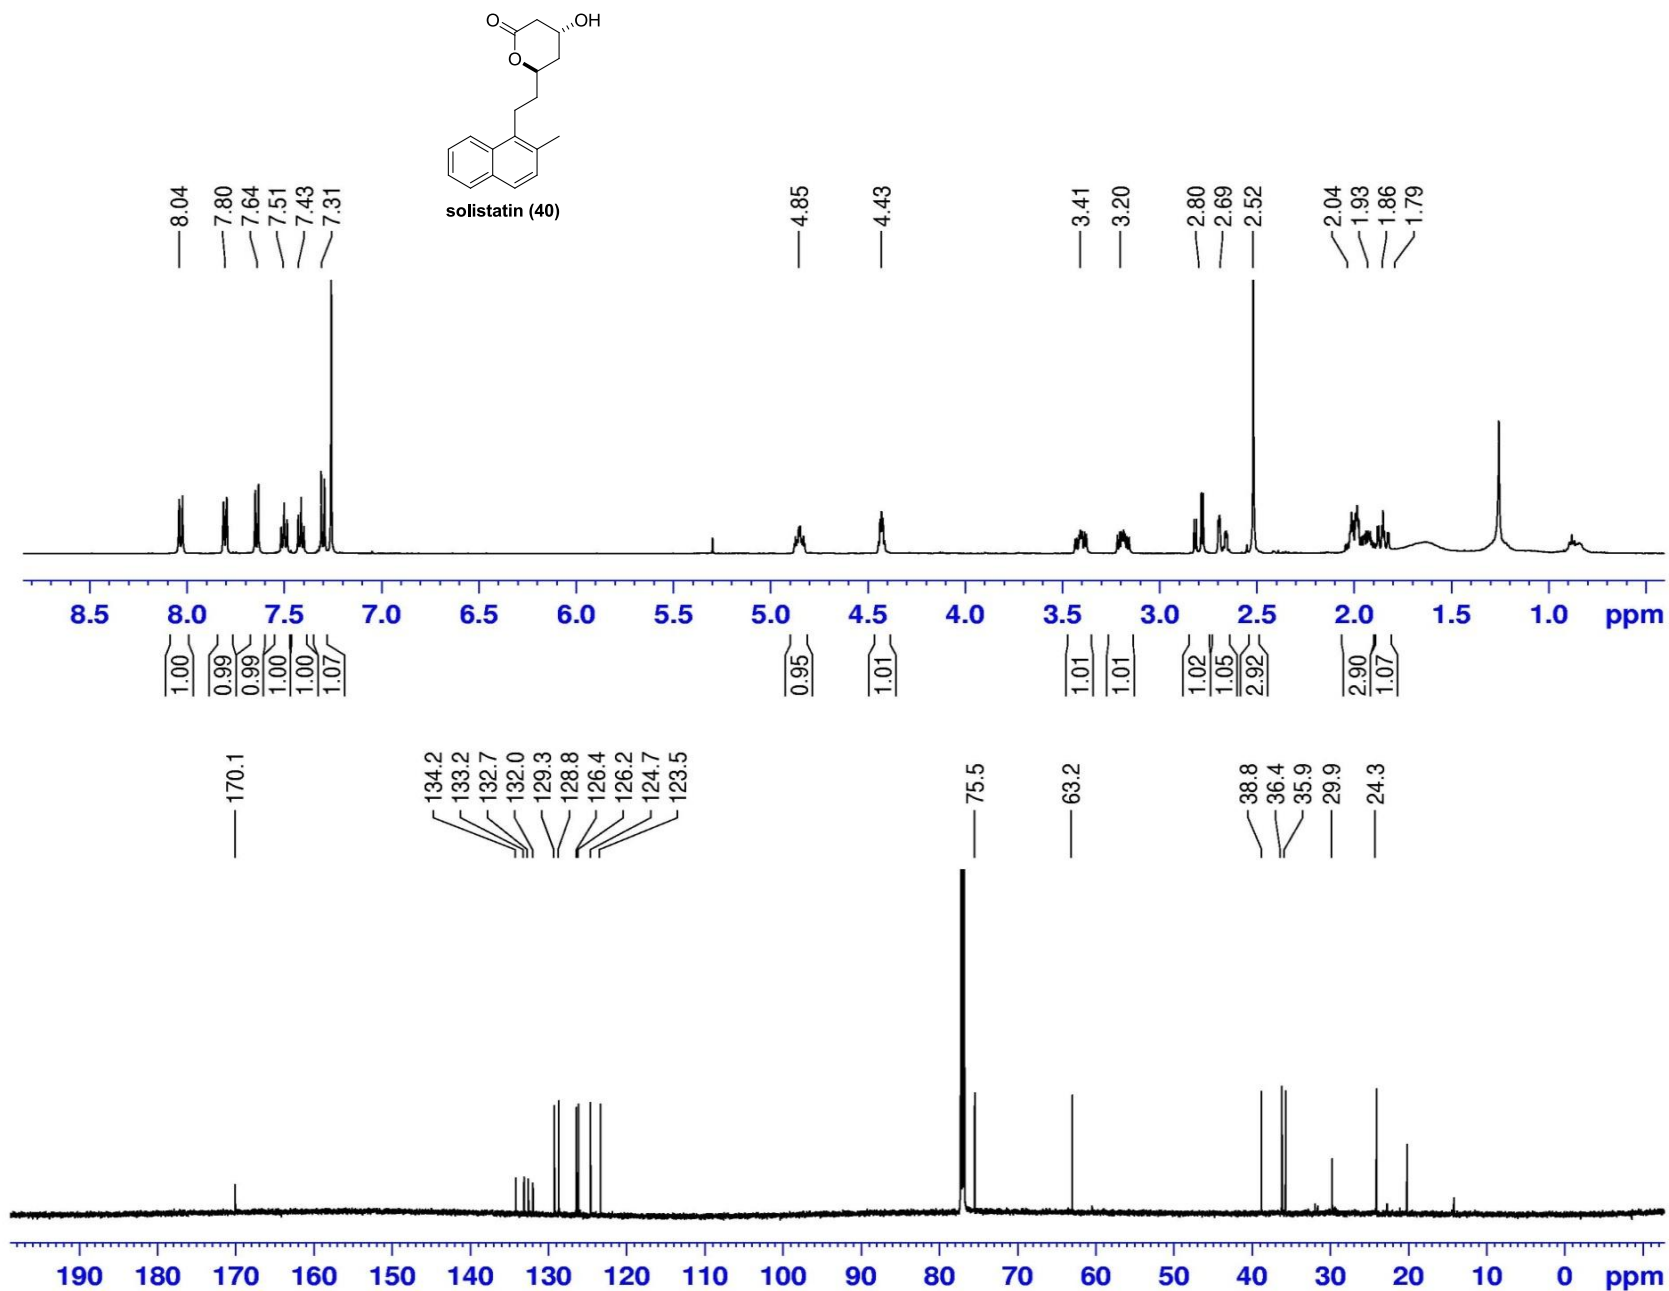

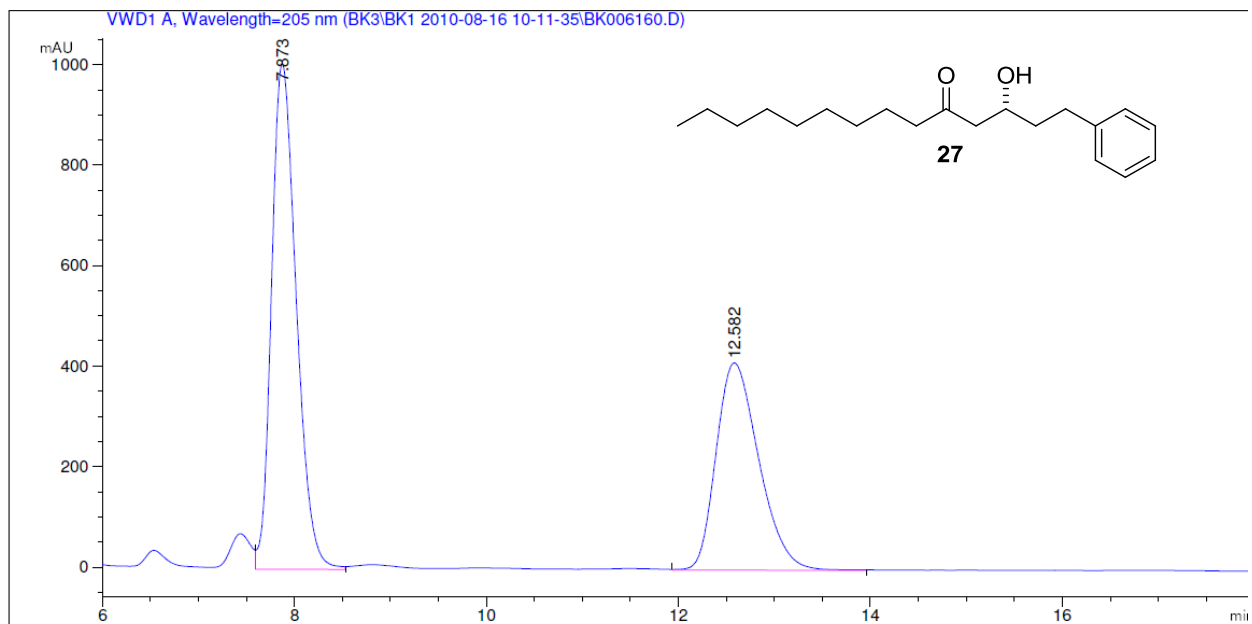

| Peak # | RetTime [min] | Type | Width [min] | Area mAU  | Height [mAU] | Area %  |
|--------|---------------|------|-------------|-----------|--------------|---------|
| 1      | 7.873         | VV   | 0.2771      | 1.79999e4 | 1006.29382   | 58.4702 |
| 2      | 12.582        | VB   | 0.4810      | 1.27848e4 | 412.52826    | 41.5298 |

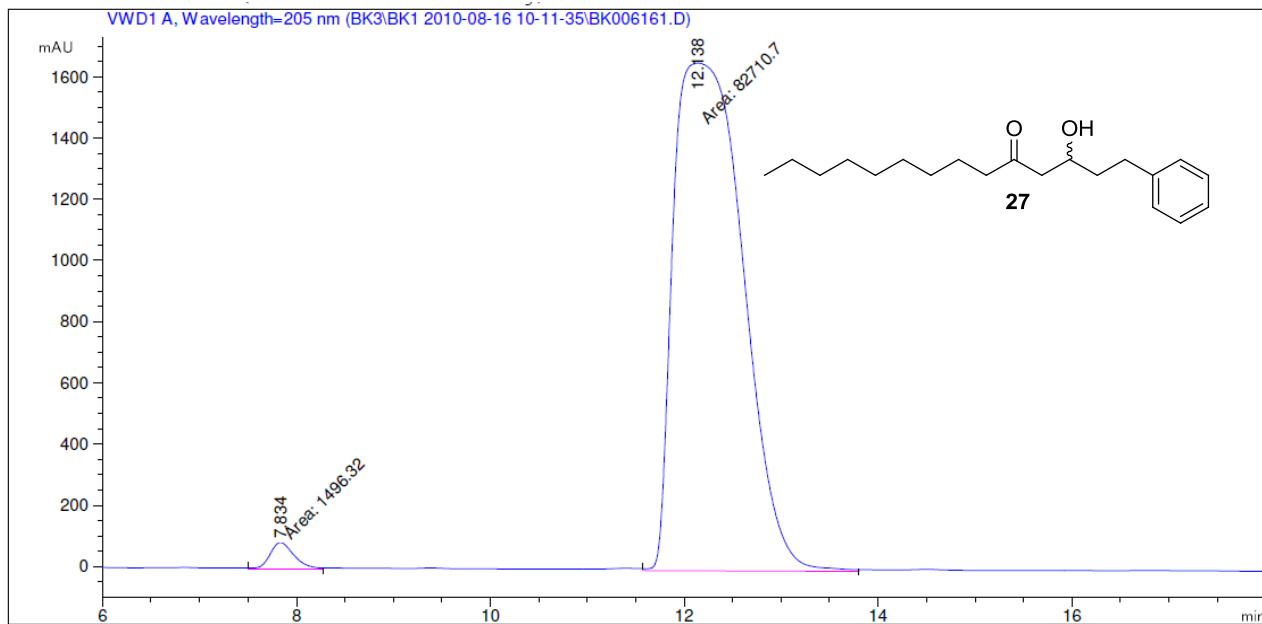

| Peak # | RetTime [min] | Type | Width [min] | Area mAU   | Height [mAU] | Area %  |
|--------|---------------|------|-------------|------------|--------------|---------|
| 1      | 7.834         | MM   | 0.2861      | 1464.21179 | 85.28441     | 1.7436  |
| 2      | 12.137        | VV   | 0.8124      | 8.25107e4  | 1657.16943   | 98.2564 |

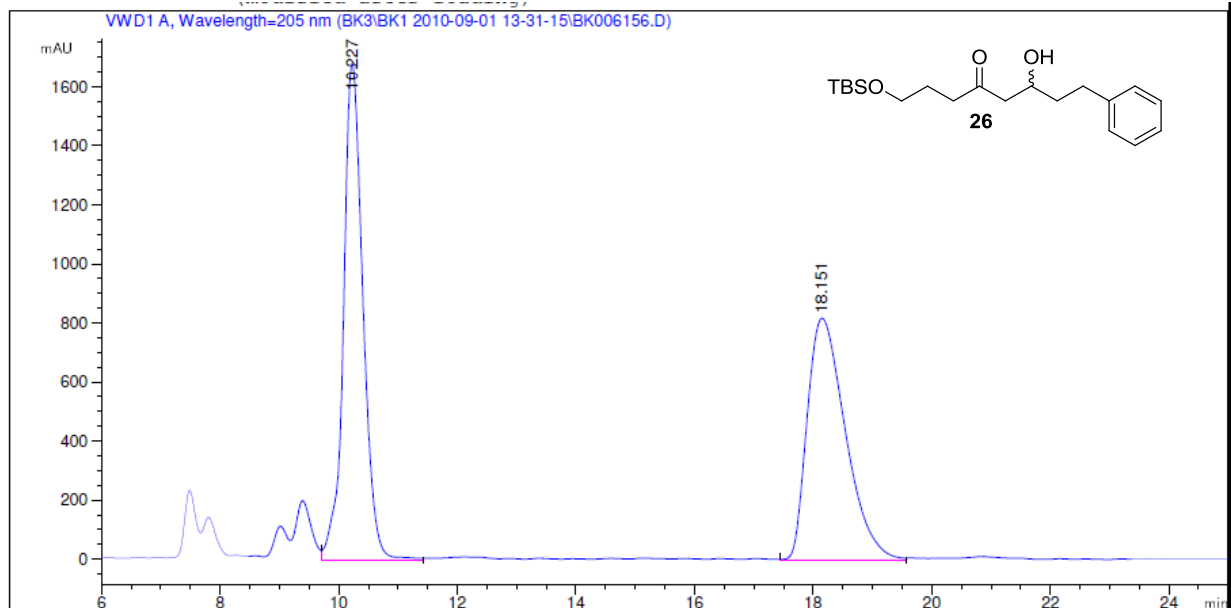

| Peak # | RetTime [min] | Type | Width [min] | Area mAU *s | Height [mAU] | Area %  |
|--------|---------------|------|-------------|-------------|--------------|---------|
| 1      | 10.227        | VB   | 0.3449      | 3.83431e4   | 1680.15918   | 51.0998 |
| 2      | 18.151        | VV   | 0.7060      | 3.66926e4   | 819.17365    | 48.9002 |

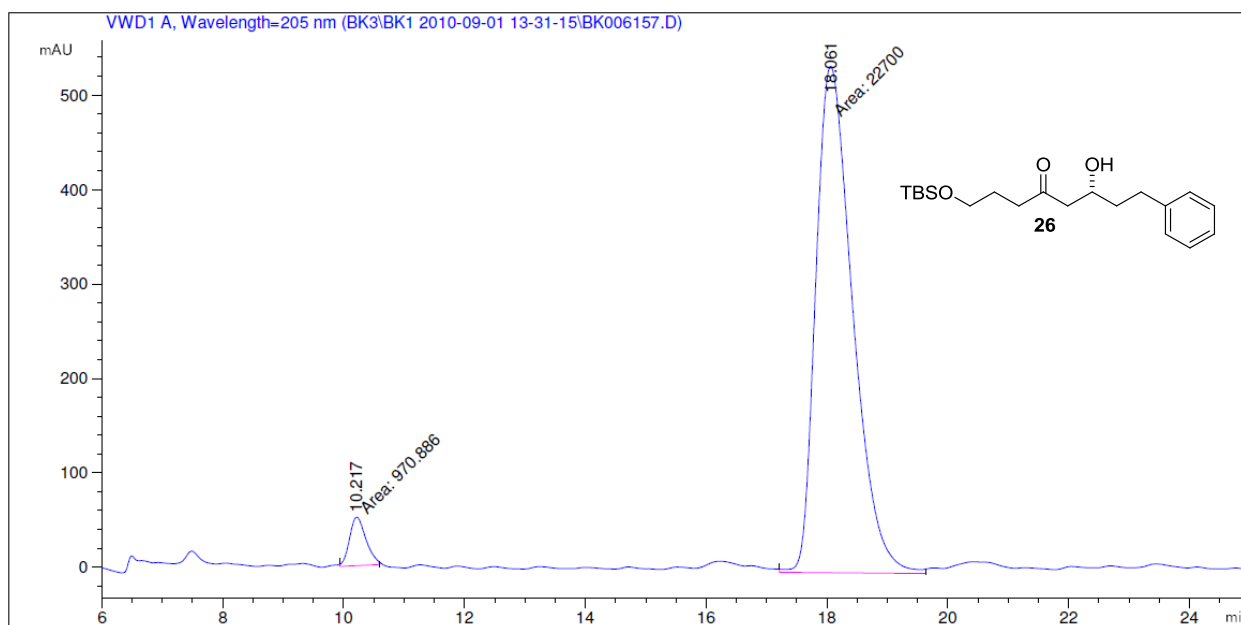

| Peak # | RetTime [min] | Type | Width [min] | Area mAU *s | Height [mAU] | Area %  |
|--------|---------------|------|-------------|-------------|--------------|---------|
| 1      | 10.217        | MM   | 0.3193      | 979.10400   | 51.11217     | 4.1675  |
| 2      | 18.061        | VV   | 0.6598      | 2.25148e4   | 535.04608    | 95.8325 |

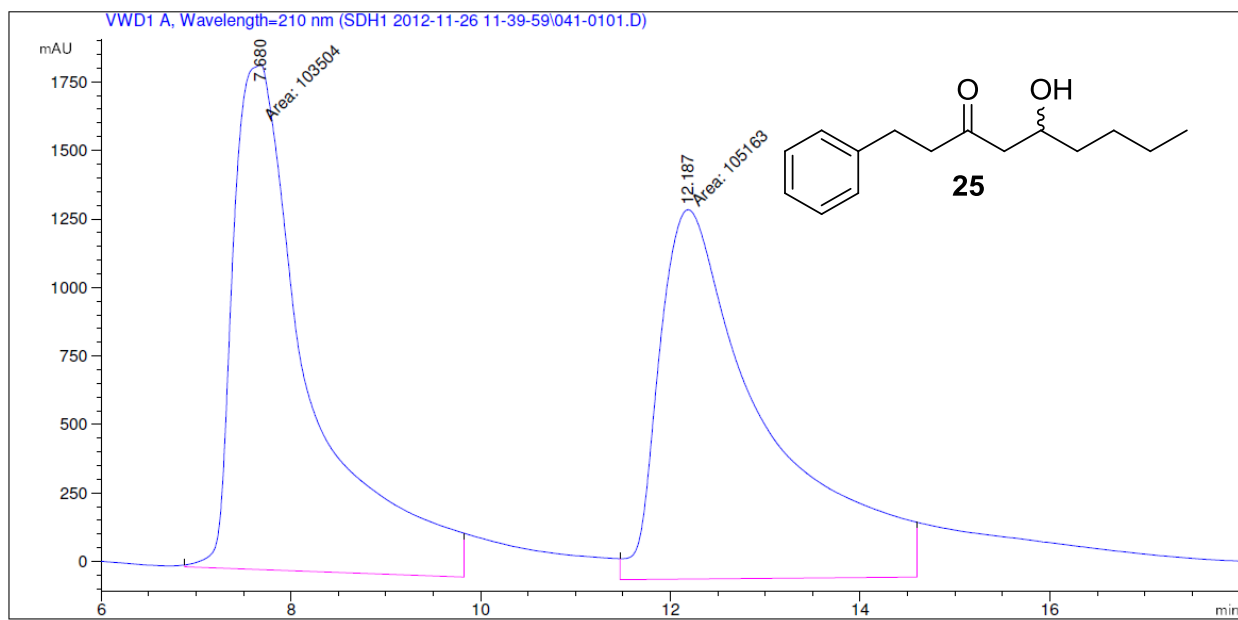

| Peak # | RetTime [min] | Type | Width [min] | Area mAU *s | Height [mAU] | Area %  |
|--------|---------------|------|-------------|-------------|--------------|---------|
| 1      | 7.680         | MM   | 0.9352      | 1.03504e5   | 1844.63452   | 49.6025 |
| 2      | 12.187        | MM   | 1.3000      | 1.05163e5   | 1348.22693   | 50.3975 |

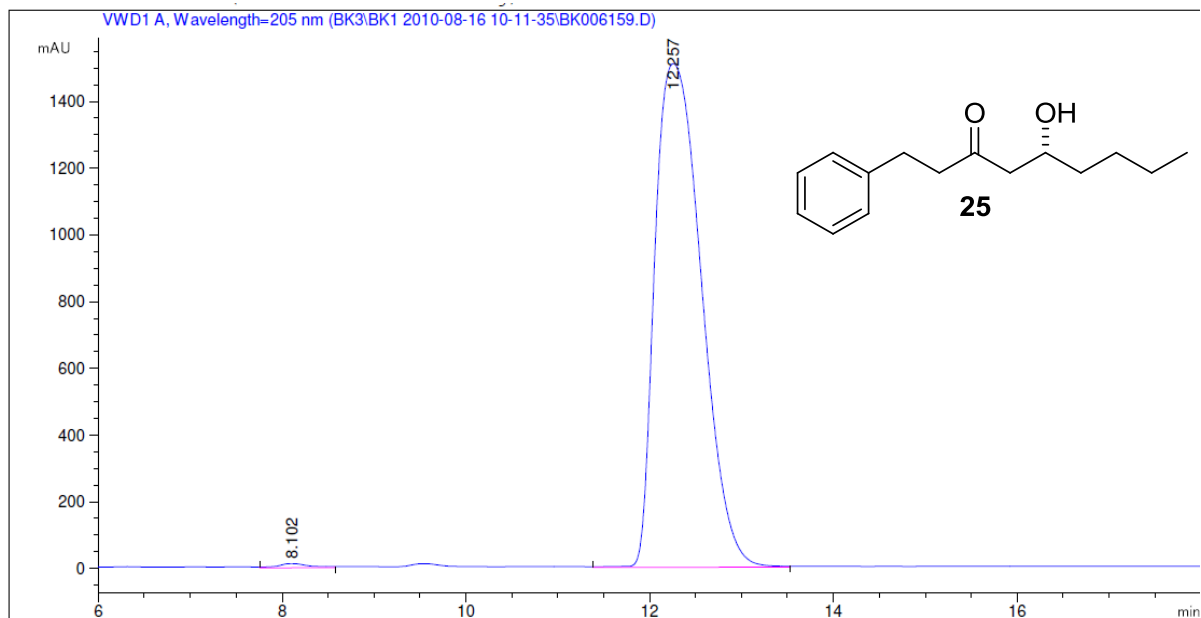

| Peak # | RetTime [min] | Type | Width [min] | Area mAU *s | Height [mAU] | Area %  |
|--------|---------------|------|-------------|-------------|--------------|---------|
| 1      | 8.102         | VV   | 0.3415      | 306.74646   | 13.03632     | 0.5757  |
| 2      | 12.257        | VB   | 0.5666      | 5.29765e4   | 1509.77332   | 99.4243 |

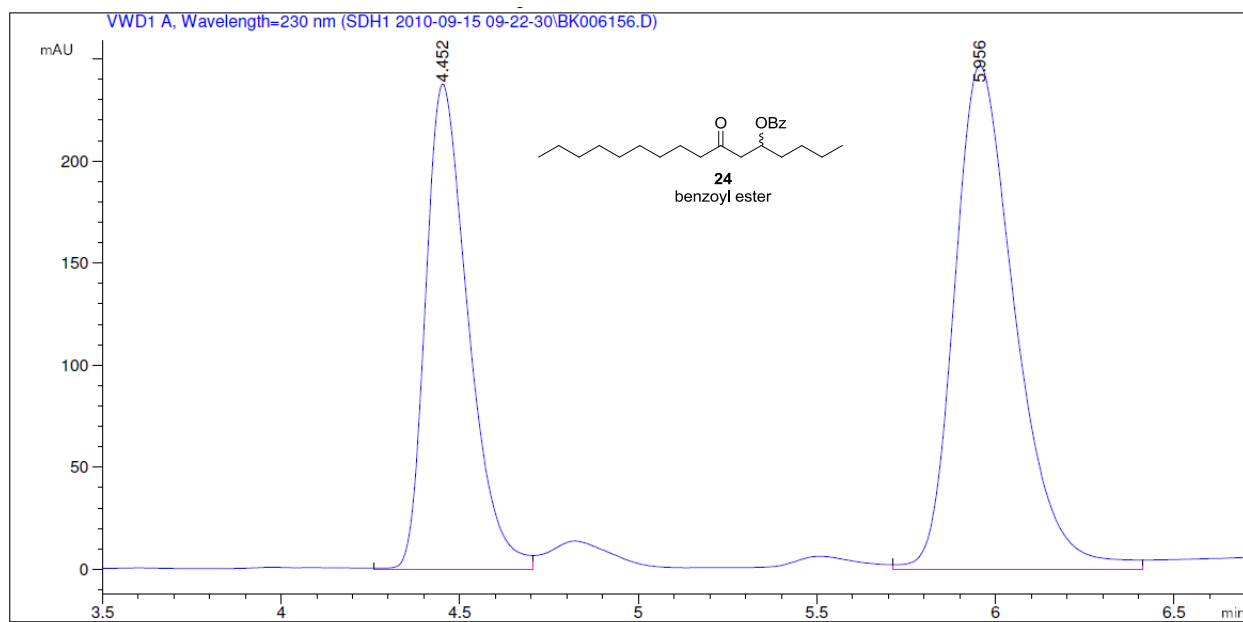

| Peak # | RetTime [min] | Type | Width [min] | Area mAU   | Area %  | Height [mAU] |
|--------|---------------|------|-------------|------------|---------|--------------|
| 1      | 4.452         | VV   | 0.1258      | 1971.41089 | 40.2380 | 237.86618    |
| 2      | 5.956         | VV   | 0.1806      | 2927.96362 | 59.7620 | 246.86720    |

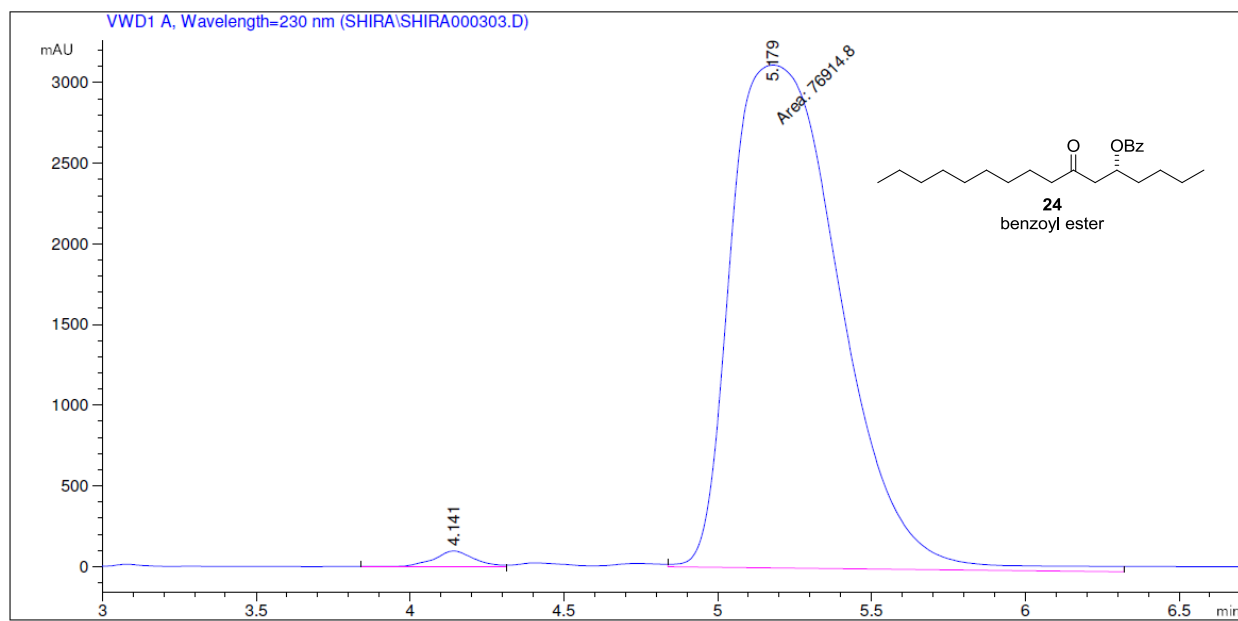

| Peak # | RetTime [min] | Type | Width [min] | Area mAU  | Area %  | Height [mAU] |
|--------|---------------|------|-------------|-----------|---------|--------------|
| 1      | 4.141         | VV   | 0.1305      | 881.31396 | 1.1541  | 97.26041     |
| 2      | 5.179         | VB   | 0.3836      | 7.54797e4 | 98.8459 | 3110.52026   |

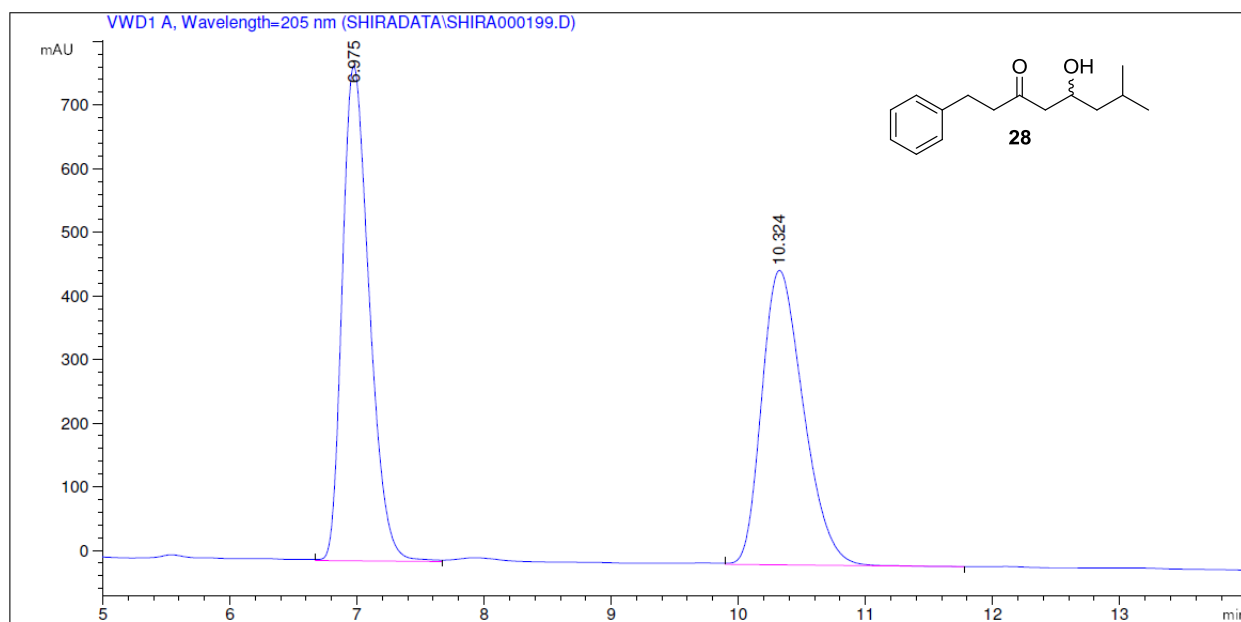

| Peak # | RetTime [min] | Type | Width [min] | Area mAU *s | Height [mAU] | Area %  |
|--------|---------------|------|-------------|-------------|--------------|---------|
| 1      | 6.975         | MM   | 0.2445      | 1.14400e4   | 779.66901    | 52.5809 |
| 2      | 10.324        | MM   | 0.3738      | 1.03169e4   | 460.00323    | 47.4191 |

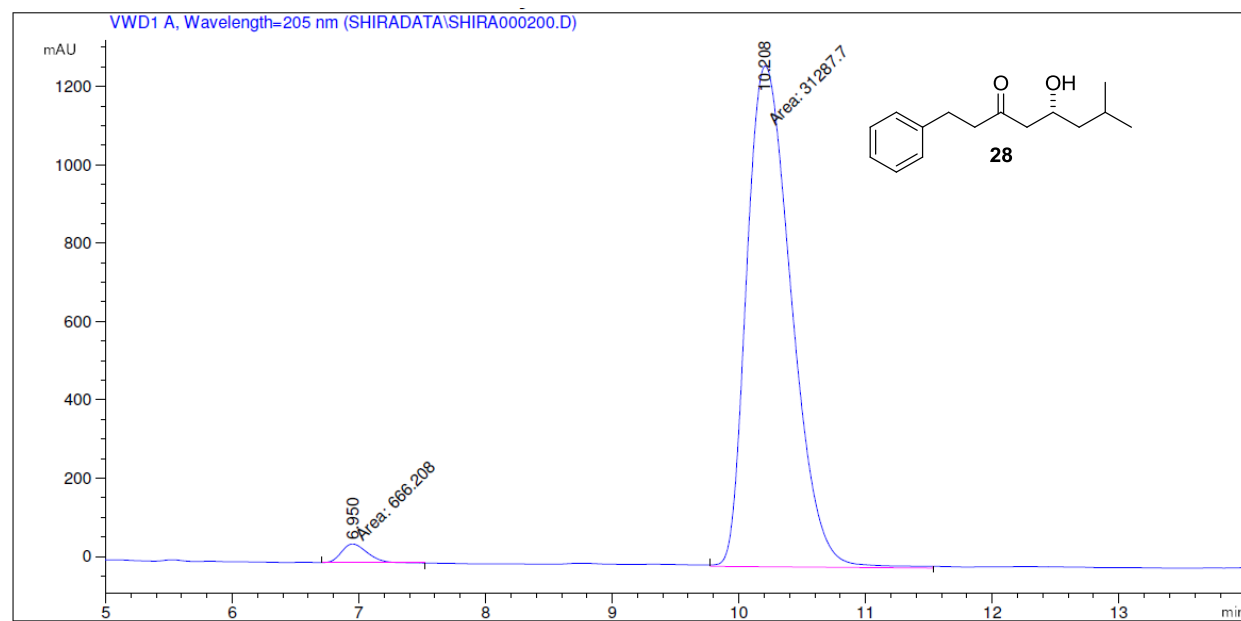

| Peak # | RetTime [min] | Type | Width [min] | Area mAU *s | Height [mAU] | Area %  |
|--------|---------------|------|-------------|-------------|--------------|---------|
| 1      | 6.950         | MM   | 0.2294      | 649.61737   | 47.19313     | 2.0484  |
| 2      | 10.208        | MM   | 0.4052      | 3.10637e4   | 1277.60266   | 97.9516 |

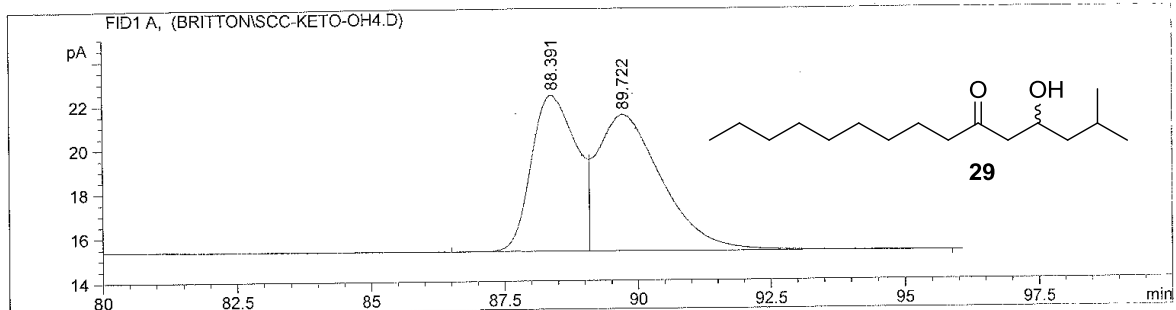

| Peak # | RetTime [min] | Type | Width [min] | Area [pA*s] | Height [pA] | Area %   |
|--------|---------------|------|-------------|-------------|-------------|----------|
| 1      | 39.963        | VV   | 0.4322      | 41.15893    | 1.49949     | 4.21302  |
| 2      | 88.391        | VV   | 0.8940      | 415.05957   | 7.05911     | 42.48537 |
| 3      | 89.722        | VV   | 1.2395      | 520.72864   | 6.17689     | 53.30162 |

Analysis Method : C:\CHEM32\1\METHODS\FPAP.M  
 Last changed : 09/08/2012 2:08:27 PM by Regine  
 (modified after loading)  
 Sample Info : 100(0)10-140, chiral material!

$$\frac{550}{580} = 95\%$$

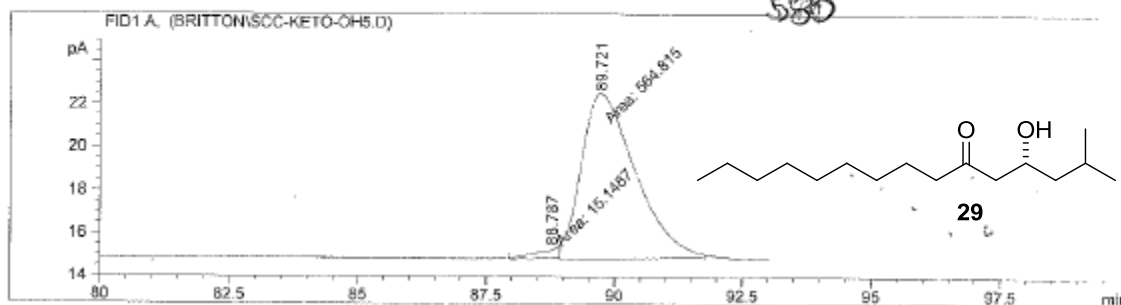

| Peak # | RetTime [min] | Type | Width [min] | Area [pA*s] | Height [pA] | Area %   |
|--------|---------------|------|-------------|-------------|-------------|----------|
| 1      | 6.137         | BV   | 0.4077      | 12.16436    | 7.72565e-1  | 1.84717  |
| 2      | 7.628         | VV   | 3.5795      | 61.98114    | 2.09506e-1  | 9.41190  |
| 3      | 39.978        | VV   | 0.6314      | 4.43102     | 1.09652e-1  | 0.67286  |
| 4      | 88.787        | MM   | 0.6199      | 15.14868    | 4.07288e-1  | 2.30034  |
| 5      | 89.721        | MM   | 1.2195      | 564.81488   | 7.71907     | 85.76773 |

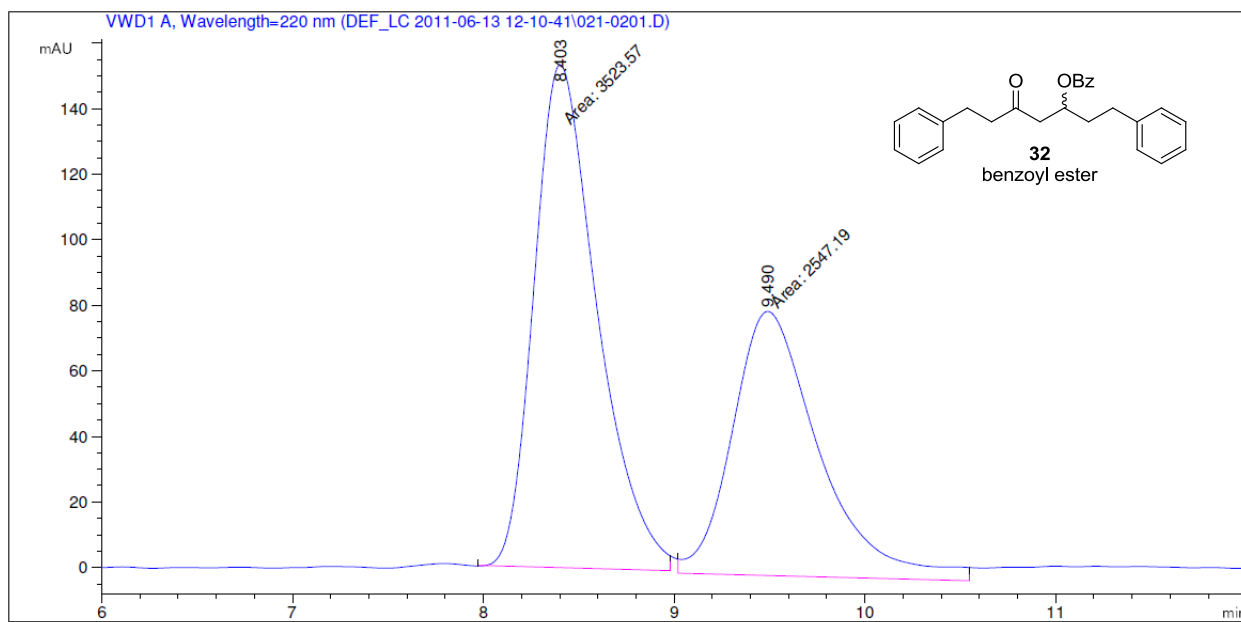

| Peak # | RetTime [min] | Type | Width [min] | Area mAU *s | Height [mAU] | Area %  |
|--------|---------------|------|-------------|-------------|--------------|---------|
| 1      | 8.403         | VV   | 0.3491      | 3546.01221  | 153.76456    | 60.6862 |
| 2      | 9.490         | VB   | 0.4469      | 2297.18335  | 78.35359     | 39.3138 |

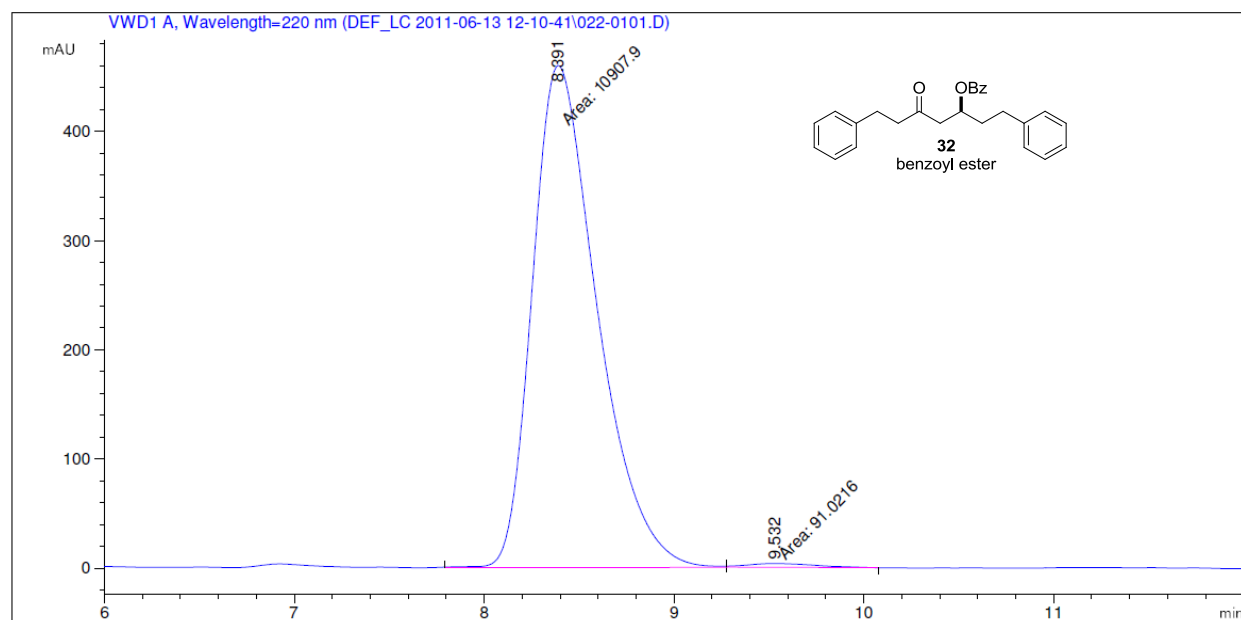

| Peak # | RetTime [min] | Type | Width [min] | Area mAU *s | Height [mAU] | Area %  |
|--------|---------------|------|-------------|-------------|--------------|---------|
| 1      | 8.391         | MM   | 0.3954      | 1.09079e4   | 459.75327    | 99.1724 |
| 2      | 9.532         | MM   | 0.4221      | 91.02157    | 3.59410      | 0.8276  |



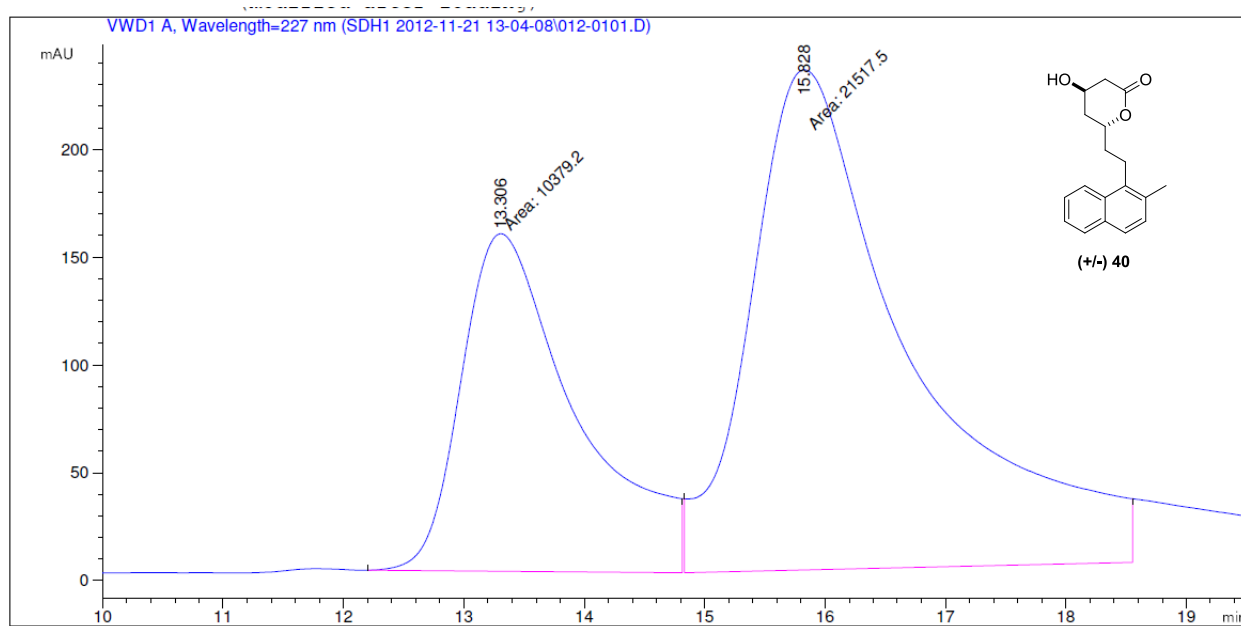

| Peak # | RetTime [min] | Type | Width [min] | Area mAU  | Height [mAU] | Area %  |
|--------|---------------|------|-------------|-----------|--------------|---------|
| 1      | 13.306        | MM   | 1.1379      | 1.07567e4 | 157.54660    | 32.1620 |
| 2      | 15.828        | MM   | 1.6209      | 2.26888e4 | 233.29745    | 67.8380 |

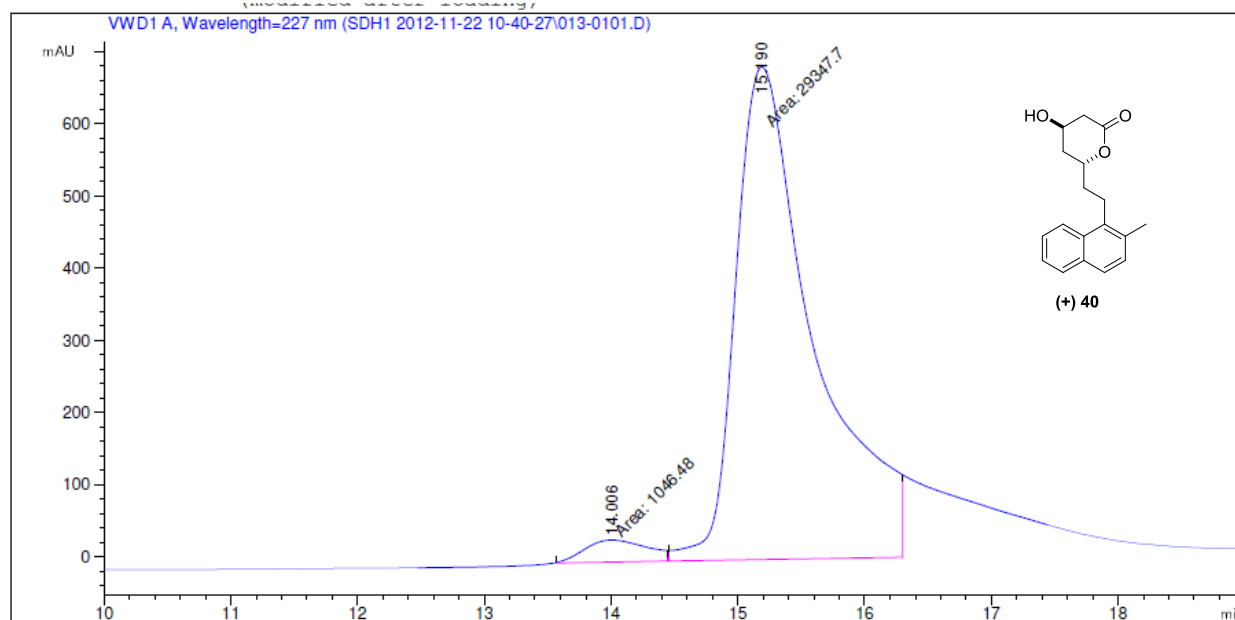

| Peak # | RetTime [min] | Type | Width [min] | Area mAU   | Height [mAU] | Area %  |
|--------|---------------|------|-------------|------------|--------------|---------|
| 1      | 14.006        | MM   | 0.6682      | 1482.08887 | 36.96630     | 3.4584  |
| 2      | 15.190        | MM   | 0.9960      | 4.13725e4  | 692.29071    | 96.5416 |
